# Supplementary material for: Nickel-catalysed chelation-assisted reductive defluorinative sulfenylation of trifluoropropionic acid derivatives
Source: Royal Society of Chemistry journal article supplement (doi:10.1039/d3cc06041a), 2024-01-01

## *Supporting Information*

### **Nickel-catalysed chelation-assisted reductive defluorinative sulfenylation of trifluoropropionic acid derivatives**

Yu-Qiu Guan, Jia-Fan Qiao and Yu-Feng Liang\*

*School of Chemistry and Chemical Engineering, Shandong University, Jinan 250100, China,*

*E-mail: yfliang@sdu.edu.cn*

## Table of Contents

|                                                        |            |
|--------------------------------------------------------|------------|
| <b>1. General remarks .....</b>                        | <b>S3</b>  |
| <b>2. General procedure .....</b>                      | <b>S4</b>  |
| <b>3. Optimization of the reaction conditions.....</b> | <b>S6</b>  |
| <b>4. Characterization data .....</b>                  | <b>S10</b> |
| <b>5. Mechanistic studies .....</b>                    | <b>S25</b> |
| <b>6. Proposed reaction mechanism for amides .....</b> | <b>S29</b> |
| <b>7. References.....</b>                              | <b>S29</b> |
| <b>8. NMR Spectra .....</b>                            | <b>S30</b> |

## 1. General remarks

$^1\text{H}$  NMR,  $^{13}\text{C}$  NMR data were obtained on AVANCE III Bruker 500 MHz nuclear resonance spectrometers unless otherwise noted. Chemical shifts (in ppm) were referenced to tetramethylsilane (TMS) ( $\delta = 0.00$  ppm) in  $\text{CDCl}_3$  or dimethyl sulfoxide ( $\delta = 2.50$  ppm) in  $\text{DMSO}-d_6$  as an internal standard. The data of  $^1\text{H}$  NMR was reported as follows: chemical shift, multiplicity (s = singlet, d = doublet, t = triplet, m = multiplet and br = broad), coupling constant (J values) in Hz and integration.  $^{13}\text{C}$  NMR spectra were obtained by the same NMR spectrometers and were calibrated with  $\text{CDCl}_3$  ( $\delta = 77.16$  ppm) or  $\text{DMSO}-d_6$  ( $\delta = 39.50$  ppm). Flash chromatography was performed using 300-400 mesh silica gel with the indicated eluent according to standard techniques. Analytical thin-layer chromatography (TLC) was performed on pre-coated, glass-backed silica gel plates. Analysis of crude reaction mixture was done on an Agilent 7890 GC System with an Agilent 5975 Mass Selective Detector. Visualization of the developed chromatogram was performed by UV absorbance (254 nm) unless otherwise noted. High-resolution mass spectral (HRMS) data were recorded on Bruker APEX IV Fourier transform ion cyclotron resonance mass spectrometer using electrospray ionization (ESI) mode.



was dried over Na<sub>2</sub>SO<sub>4</sub>, filtered, and concentrated. The residue was purified by flash chromatography.

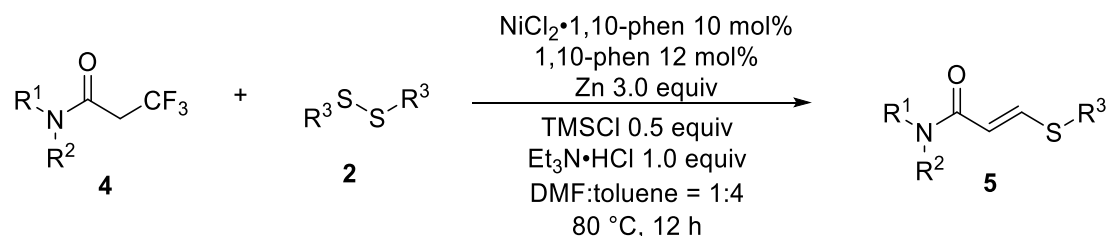

**General procedure for the Ni-catalysed reductive cross-coupling of Product 5:** To a 10 mL Schlenk tube was added sequentially NiCl<sub>2</sub>·1,10-phen (6.20 mg, 0.02 mmol), 1,10-phenanthroline (4.32 mg, 0.024 mmol), Zn power (32.90 mg, 0.6 mmol), Et<sub>3</sub>N·HCl (27.53 mg, 0.2 mmol) and disulfides **2** (0.30 mmol). The vessel was evacuated and filled with argon (three times), toluene (0.40 mL) was added via syringe and the mixture was stirred at room temperature for 10 min. The trifluoropropanamides **4** (0.20 mmol) was added, followed by the chlorotrimethylsilane (10.86 mg, 12.68 μL, 0.10 mmol) in one portion. DMF (0.10 mL) was subsequently added via syringe. The resulting solution was stirred for 12 h at 80 °C. After this time, the crude reaction mixture was diluted with ethyl acetate (5 mL) and washed with water (2.0 mL). The organic layer was dried over Na<sub>2</sub>SO<sub>4</sub>, filtered, and concentrated. The residue was purified by flash chromatography.

### 3. Optimization of the reaction conditions

**Table S1.** Optimization of the catalysts

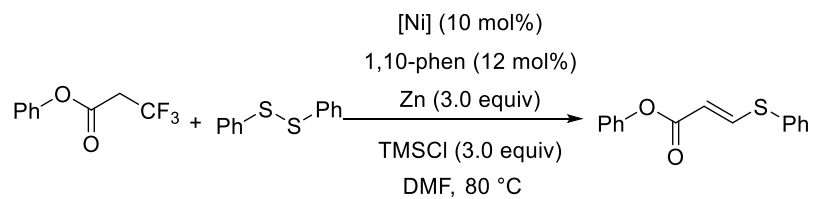

| entry | conditions                           | yield |
|-------|--------------------------------------|-------|
| 1     | NiF <sub>2</sub>                     | <10%  |
| 2     | NiCl <sub>2</sub>                    | 32%   |
| 3     | NiBr <sub>2</sub>                    | 12%   |
| 4     | NiI <sub>2</sub>                     | <10%  |
| 5     | NiCl <sub>2</sub> •DME               | 15%   |
| 6     | NiBr <sub>2</sub> •DME               | <10%  |
| 7     | NiCl <sub>2</sub> •6H <sub>2</sub> O | <10%  |
| 8     | NiCl <sub>2</sub> •1,10-phen         | 30%   |
| 9     | Ni(OTf) <sub>2</sub>                 | <10%  |
| 10    | NiBr <sub>2</sub> •bpy               | 20%   |
| 11    | NiBr <sub>2</sub> •diglyme           | 15%   |
| 12    | Ni(acac) <sub>2</sub>                | 20%   |
| 13    | NiCl <sub>2</sub> •dppe              | 23%   |
| 14    | Fe(OTf) <sub>3</sub>                 | trace |
| 15    | CoBr <sub>2</sub>                    | trace |
| 16    | CrCl <sub>3</sub>                    | trace |

**Table S2.** Optimization of the ligands

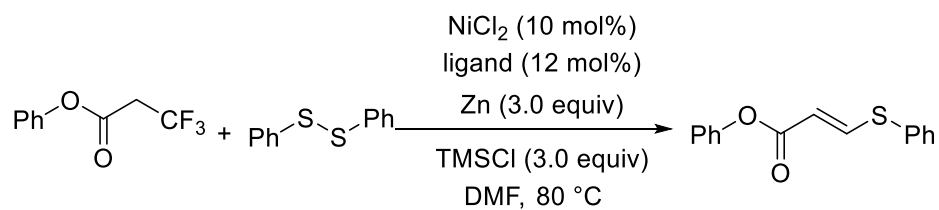

| entry | ligand           | yield                     |
|-------|------------------|---------------------------|
| 1     | 1,10-phen        | 32% ( <i>E:Z</i> = 85:15) |
| 2     | bpy              | 20% ( <i>E:Z</i> = 80:20) |
| 3     | L1               | <10%                      |
| 4     | L2               | 18%                       |
| 5     | L3               | 10%                       |
| 6     | L4               | <20%                      |
| 7     | L5               | 20%                       |
| 8     | L6               | trace                     |
| 9     | L7               | 10%                       |
| 10    | L8               | 18%                       |
| 11    | dppe             | n.d.                      |
| 12    | PCy <sub>3</sub> | trace                     |
| 13    | L9               | trace                     |
| 14    | L10              | n.d.                      |

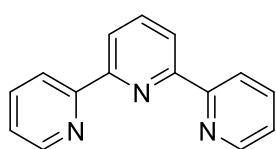

L1

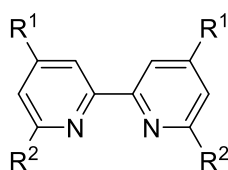

L2: R<sup>1</sup> = *t*Bu, R<sup>2</sup> = H  
 L3: R<sup>1</sup> = H, R<sup>2</sup> = Me  
 L4: R<sup>1</sup> = OMe, R<sup>2</sup> = H  
 L5: R<sup>1</sup> = Me, R<sup>2</sup> = H

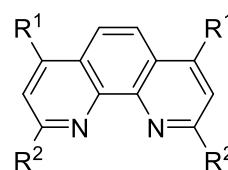

L6: R<sup>1</sup> = H, R<sup>2</sup> = Me  
 L7: R<sup>1</sup> = Ph, R<sup>2</sup> = H  
 L8: R<sup>1</sup> = Me, R<sup>2</sup> = H

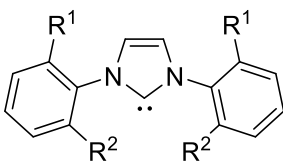

L9: R<sup>1</sup> = R<sup>2</sup> = *i*Pr  
 L10: R<sup>1</sup> = R<sup>2</sup> = Cy

**Table S3.** Optimization of reaction temperature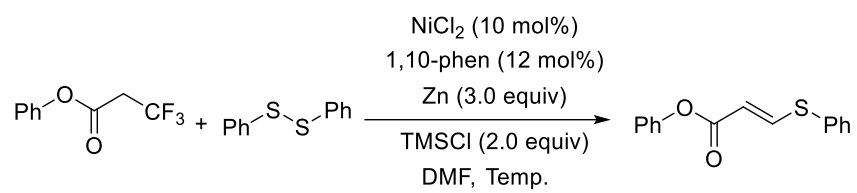

| entry | Temp.  | yield                      |
|-------|--------|----------------------------|
| 1     | 100 °C | 15 % ( <i>E:Z</i> = 72:28) |
| 2     | 80 °C  | 32 % ( <i>E:Z</i> = 70:30) |
| 3     | 60 °C  | 20 % ( <i>E:Z</i> = 49:51) |
| 4     | 40 °C  | n.d.                       |
| 5     | r.t.   | n.d.                       |



**Table S4.** Optimization of the additive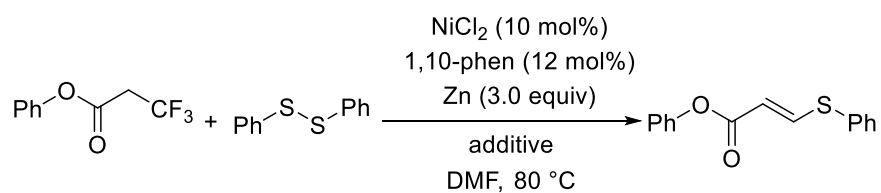

| entry | additive                                        | yield                               |
|-------|-------------------------------------------------|-------------------------------------|
| 1     | none                                            | <10%                                |
| 2     | CsF                                             | 11%                                 |
| 3     | MgCl <sub>2</sub>                               | <10%                                |
| 4     | LiBr                                            | <10%                                |
| 5     | NaI                                             | <10%                                |
| 6     | TMEDA                                           | <10%                                |
| 7     | pyridine                                        | 11%                                 |
| 8     | TMSCl (0.5 equiv)                               | 20%                                 |
| 9     | TMSCl (2.0 equiv)                               | 32%                                 |
| 10    | TMSCl (3.0 equiv)                               | 30%                                 |
| 11    | TESCl (2.0 equiv)                               | 12%                                 |
| 12    | TIPSCl (2.0 equiv)                              | 10%                                 |
| 13    | DEMS (2.0 equiv)                                | trace                               |
| 14    | Et <sub>3</sub> N•HCl (1.0 equiv)               | 35 % ( <i>E</i> : <i>Z</i> = 84:16) |
| 15    | TMSCl 2.0 eq. and Et <sub>3</sub> N•HCl 1.0 eq. | 61 % ( <i>E</i> : <i>Z</i> = 80:20) |
| 16    | TMSCl 1.0 eq. and Et <sub>3</sub> N•HCl 1.0 eq. | 68 % ( <i>E</i> : <i>Z</i> = 82:18) |
| 17    | TMSCl 0.5 eq. and Et <sub>3</sub> N•HCl 1.0 eq. | 74 % ( <i>E</i> : <i>Z</i> = 83:17) |
| 18    | TMSCl 1.0 eq. and Et <sub>3</sub> N•HCl 2.0 eq. | 71 % ( <i>E</i> : <i>Z</i> = 60:40) |

**Table S5.** Optimization of the solvents

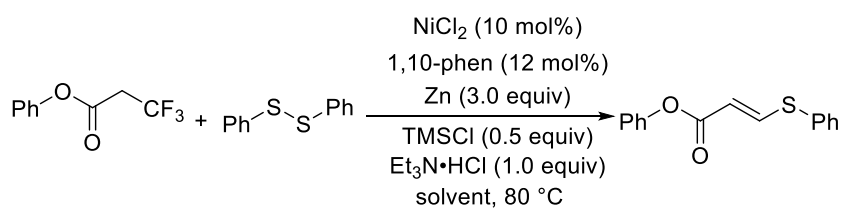

| entry           | solvent           | yield                     |
|-----------------|-------------------|---------------------------|
| 1               | DMF               | 64% ( <i>E:Z</i> = 83:17) |
| 2               | DMA               | 63% ( <i>E:Z</i> = 80:20) |
| 3               | DMSO              | 58% ( <i>E:Z</i> = 75:25) |
| 4               | THF               | trace                     |
| 5               | DCE               | n.d.                      |
| 6               | MeCN              | n.d.                      |
| 7               | toluene           | n.d.                      |
| 8               | dioxane           | n.d.                      |
| 9               | DMF:THF = 1:1     | trace                     |
| 10              | DMF:MeCN = 1:1    | trace                     |
| 11              | DMF:toluene = 1:1 | 76% ( <i>E:Z</i> = 81:19) |
| 12              | DMF:dioxane = 1:1 | 59% ( <i>E:Z</i> = 80:20) |
| 13              | DMF:toluene = 9:1 | 72% ( <i>E:Z</i> = 80:20) |
| 14              | DMF:toluene = 4:1 | 69% ( <i>E:Z</i> = 83:17) |
| 15              | DMF:toluene = 1:4 | 85% ( <i>E:Z</i> = 84:16) |
| 16              | DMF:toluene = 1:9 | 50% ( <i>E:Z</i> = 70:30) |
| 17 <sup>a</sup> | DMF:toluene = 1:4 | 83% ( <i>E:Z</i> = 84:16) |

<sup>a</sup> With NiCl<sub>2</sub> · 1,10-phen as catalyst

## 4. Characterization data

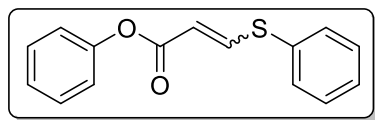

**Phenyl 3-(phenylthio)acrylate<sup>2</sup> (3aa).** The representative procedure was followed using phenyl 3,3,3-trifluoropropanoate (**1a**) (40.83 mg, 0.20 mmol) and 1,2-diphenyldisulfane (**2a**) (65.45 mg, 0.30 mmol). Isolation by column chromatography

(*n*-hexane : EtOAc = 20 : 1) yielded **3aa** (43.57 mg, 85 %) as a white solid, *E*:*Z* = 84:16. <sup>1</sup>H NMR (500 MHz, CDCl<sub>3</sub>) δ 8.00 (d, *J* = 15.0 Hz, 1H), 7.53 – 7.50 (m, 2H), 7.43 – 7.41 (m, 2H), 7.38 – 7.33 (m, 3H), 7.22 – 7.18 (m, 1H), 7.09 – 7.07 (m, 2H), 6.13 (d, *J* = 10.0 Hz, 0.19H), 5.80 (d, *J* = 15.0 Hz, 1H). <sup>13</sup>C NMR (125 MHz, CDCl<sub>3</sub>) δ 163.53, 150.60, 149.49, 133.19, 131.12, 129.77, 129.42, 129.31, 125.62, 121.54, 114.26. MS (EI) *m/z* (relative intensity): 256 (**M**<sup>+</sup>, 20), 163 (100), 135 (20), 109 (40), 91 (30).

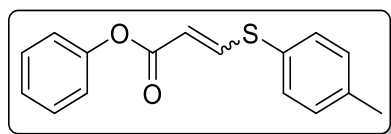

**Phenyl 3-(*p*-tolylthio)acrylate (3ab).** The representative procedure was followed using phenyl 3,3,3-trifluoropropanoate (**1a**) (40.83 mg, 0.20 mmol) and 1,2-*di-p*-tolylidylsulfane (**2b**) (73.92 mg, 0.30 mmol). Isolation by column chromatography (*n*-hexane : EtOAc = 20 : 1) yielded **3ab** (40.56 mg, 83 %) as a white solid, *E*:*Z* = 95:5. <sup>1</sup>H NMR (500 MHz, CDCl<sub>3</sub>) δ 7.99 (d, *J* = 15.0 Hz, 1H), 7.42 – 7.41 (m, 2H), 7.37 – 7.34 (m, 2H), 7.26 – 7.24 (m, 2H), 7.22 – 7.20 (m, 1H), 7.08 – 7.06 (m, 2H), 6.10 (d, *J* = 10.0 Hz, 0.05H), 5.73 (d, *J* = 15.0 Hz, 1H), 2.39 (s, 3H). <sup>13</sup>C NMR (125 MHz, CDCl<sub>3</sub>) δ 163.64, 150.65, 150.19, 139.93, 133.55, 130.60, 129.33, 125.95, 125.62, 121.58, 113.82, 21.27. MS (EI) *m/z* (relative intensity): 270 (**M**<sup>+</sup>, 20), 177 (100), 149 (10), 134 (20), 123 (30).

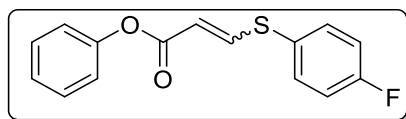

**Phenyl 3-((4-fluorophenyl)thio)acrylate (3ac).** The representative procedure was followed using phenyl 3,3,3-trifluoropropanoate (**1a**) (40.83 mg, 0.20 mmol) and 1,2-bis(4-fluorophenyl)disulfane (**2c**) (76.29 mg, 0.30 mmol). Isolation by column chromatography (*n*-hexane : EtOAc = 20 : 1) yielded **3ac** (35.66 mg, 65 %) as a white solid, *E*:*Z* = 95:5. <sup>1</sup>H NMR (500 MHz, CDCl<sub>3</sub>) δ 7.94 (d, *J* = 15.0 Hz, 1H), 7.54 – 7.51 (m, 2H), 7.38 – 7.35 (m, 2H), 7.23 – 7.21 (m, 1H), 7.17 – 7.13 (m, 2H), 7.09 – 7.06 (m,

2H), 6.12 (d,  $J = 10.0$  Hz, 0.05H), 5.72 (d,  $J = 15.0$  Hz, 1H).  $^{13}\text{C}$  NMR (125 MHz,  $\text{CDCl}_3$ )  $\delta$  163.46, 150.60, 149.46, 135.88, 135.81, 129.36, 125.70, 121.54, 117.24, 117.06, 114.30.  $^{19}\text{F}$  NMR (377 MHz,  $\text{CDCl}_3$ )  $\delta$  -110.33. MS (EI)  $m/z$  (relative intensity): 274 ( $\text{M}^+$ , 20), 181 (100), 153 (10), 127 (50), 109 (40).

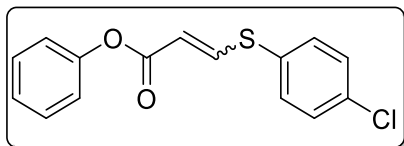

**Phenyl 3-[(4-chlorophenyl)thio]acrylate (3ad).** The representative procedure was followed using phenyl 3,3,3-trifluoropropanoate (**1a**) (40.83 mg, 0.20 mmol) and 1,2-bis(4-chlorophenyl)disulfane (**2d**) (86.16 mg, 0.30 mmol). Isolation by column chromatography (*n*-hexane : EtOAc = 10 : 1) yielded **3ad** (39.54 mg, 68 %) as a white solid,  $E:Z = 91:9$ .  $^1\text{H}$  NMR (500 MHz,  $\text{CDCl}_3$ )  $\delta$  7.90 (d,  $J = 15.0$  Hz, 1H), 7.46 – 7.44 (m, 1H), 7.42 – 7.41 (m, 1H), 7.40 – 7.35 (m, 4H), 7.24 – 7.20 (m, 1H), 7.10 – 7.07 (m, 2H), 6.15 (d,  $J = 10.0$  Hz, 0.1H), 5.79 (d,  $J = 15.0$  Hz, 1H).  $^{13}\text{C}$  NMR (125 MHz,  $\text{CDCl}_3$ )  $\delta$  163.37, 150.57, 148.64, 137.48, 135.91, 134.51, 130.05, 129.35, 125.70, 121.51, 114.78. MS (EI)  $m/z$  (relative intensity): 290 ( $\text{M}^+$ , 10), 197 (100), 143 (30), 134 (30), 108 (30).

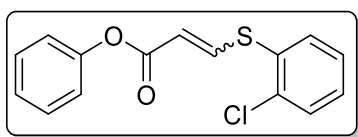

**Phenyl 3-[(2-chlorophenyl)thio]acrylate (3ae).** The representative procedure was followed using phenyl 3,3,3-trifluoropropanoate (**1a**) (40.83 mg, 0.20 mmol) and 1,2-bis(2-chlorophenyl)disulfane (**2e**) (86.16 mg, 0.30 mmol). Isolation by column chromatography (*n*-hexane : EtOAc = 10 : 1) yielded **3ae** (40.71 mg, 70 %) as a white solid,  $E:Z = 91:9$ .  $^1\text{H}$  NMR (500 MHz,  $\text{CDCl}_3$ )  $\delta$  7.92 (d,  $J = 15.0$  Hz, 1H), 7.62 – 7.60 (m, 1H), 7.55 – 7.53 (m, 1H), 7.40 – 7.37 (m, 4H), 7.24 – 7.20 (m, 1H), 7.10 – 7.09 (m, 2H), 6.20 (d,  $J = 10.0$  Hz, 0.1H), 5.78 (d,  $J = 15.0$  Hz, 1H).  $^{13}\text{C}$  NMR (125 MHz,  $\text{CDCl}_3$ )  $\delta$  163.39, 150.58, 146.92, 137.48, 135.05, 130.93, 130.62, 129.37, 129.10,

127.96, 125.72, 121.56, 115.20. **MS** (EI)  $m/z$  (relative intensity): 290 ( $M^+$ , 10), 197 (100), 143 (30), 134 (30), 108 (40).

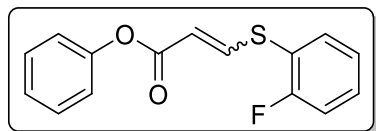

**Phenyl 3-[(2-fluorophenyl)thio]acrylate (3af)**. The representative procedure was followed using phenyl 3,3,3-trifluoropropanoate (**1a**) (40.83 mg, 0.20 mmol) and 1,2-bis(2-fluorophenyl)disulfane (**2f**) (76.29 mg, 0.30 mmol). Isolation by column chromatography (*n*-hexane : EtOAc = 20 : 1) yielded **3af** (32.91 mg, 60 %) as a white solid, *E:Z* = 83:17. **<sup>1</sup>H NMR (500 MHz, CDCl<sub>3</sub>)**  $\delta$  7.89 (d, *J* = 15.0 Hz, 1H), 7.56 – 7.52 (m, 1H), 7.48 – 7.43 (m, 1H), 7.38 – 7.34 (m, 2H), 7.23 – 7.20 (m, 3H), 7.09 – 7.07 (m, 2H), 6.16 (d, *J* = 10.0 Hz, 0.2H), 5.75 (d, *J* = 15.0 Hz, 1H). **<sup>13</sup>C NMR (125 MHz, CDCl<sub>3</sub>)**  $\delta$  163.30, 150.58, 147.26, 135.62, 132.25, 129.36, 125.68, 125.33, 125.30, 121.54, 116.75, 116.57, 114.88. **<sup>19</sup>F NMR (377 MHz, CDCl<sub>3</sub>)**  $\delta$  -106.89, -108.38. **MS** (EI)  $m/z$  (relative intensity): 274 ( $M^+$ , 10), 181 (100), 127 (30), 109 (30).

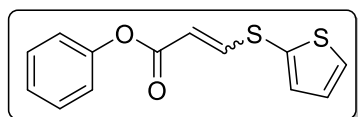

**Phenyl 3-(thiophen-2-ylthio)acrylate (3ag)**. The representative procedure was followed using phenyl 3,3,3-trifluoropropanoate (**1a**) (40.83 mg, 0.20 mmol) and 1,2-di(thiophen-2-yl)disulfane (**2g**) (69.11 mg, 0.30 mmol). Isolation by column chromatography (*n*-hexane : EtOAc = 20 : 1) yielded **3ag** (37.77 mg, 72 %) as a white solid, *E:Z* = 85:15. **<sup>1</sup>H NMR (500 MHz, CDCl<sub>3</sub>)**  $\delta$  7.84 (d, *J* = 15.0 Hz, 1H), 7.38 – 7.33 (m, 2H), 7.29 – 7.28 (m, 1H), 7.22 – 7.18 (m, 1H), 7.11 – 7.10 (m, 1H), 7.07 – 7.06 (m, 2H), 6.07 (d, *J* = 10.0 Hz, 0.2H), 5.74 (d, *J* = 15.0 Hz, 1H). **<sup>13</sup>C NMR (125 MHz, CDCl<sub>3</sub>)**  $\delta$  163.25, 150.50, 149.90, 136.48, 132.33, 129.28, 128.31, 125.74, 125.63, 121.47, 114.65. **MS** (EI)  $m/z$  (relative intensity): 262 ( $M^+$ , 10), 168 (100), 140 (10), 114 (30).

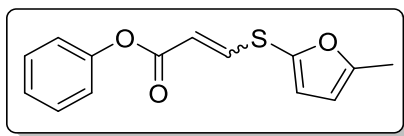

**Phenyl 3-[(5-methylfuran-2-yl)thio]acrylate (3ah).** The representative procedure was followed using phenyl 3,3,3-trifluoropropanoate (**1a**) (40.83 mg, 0.20 mmol) and 1,2-bis(5-methylfuran-2-yl)disulfane (**2h**) (67.89 mg, 0.30 mmol). Isolation by column chromatography (*n*-hexane : EtOAc = 20 : 1) yielded **3ah** (36.44 mg, 70 %) as a white solid, *E:Z* = 81:19. <sup>1</sup>H NMR (500 MHz, CDCl<sub>3</sub>) δ 7.80 (d, *J* = 15.0 Hz, 1H), 7.40 – 7.39 (m, 1H), 7.37 – 7.34 (m, 2H), 7.24 – 7.18 (m, 1H), 7.09 – 7.07 (m, 2H), 6.40 – 6.39 (m, 1H), 6.08 (d, *J* = 10.0 Hz, 0.25H), 5.69 (d, *J* = 15.0 Hz, 1H), 2.35 (s, 3H). <sup>13</sup>C NMR (125 MHz, CDCl<sub>3</sub>) δ 163.48, 156.71, 150.60, 148.68, 141.73, 129.31, 125.61, 121.56, 121.53, 114.41, 113.91, 11.78. MS (EI) *m/z* (relative intensity): 260 (**M**<sup>+</sup>, 20), 167 (100), 134 (10), 113 (30).

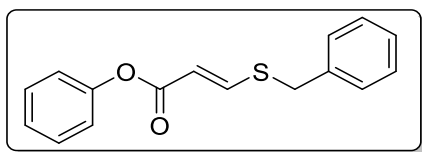

**Phenyl (*E*)-3-(benzylthio)acrylate (3ai).** The representative procedure was followed using phenyl 3,3,3-trifluoropropanoate (**1a**) (40.83 mg, 0.20 mmol) and 1,2-dibenzyldisulfane (**2i**) (73.92 mg, 0.30 mmol). Isolation by column chromatography (*n*-hexane : EtOAc = 20 : 1) yielded **3ai** (23.25 mg, 43 %) as a white solid, *E:Z* > 99:1. <sup>1</sup>H NMR (500 MHz, CDCl<sub>3</sub>) δ 7.91 (d, *J* = 15.0 Hz, 1H), 7.38 – 7.36 (m, 6H), 7.34 – 7.29 (m, 1H), 7.24 – 7.20 (m, 1H), 7.10 – 7.09 (m, 2H), 5.99 (d, *J* = 15.0 Hz, 1H), 4.08 (s, 2H). <sup>13</sup>C NMR (125 MHz, CDCl<sub>3</sub>) δ 163.50, 150.67, 148.53, 135.15, 129.32, 128.88, 128.78, 127.84, 125.62, 121.59, 113.25, 36.65. MS (EI) *m/z* (relative intensity): 270 (**M**<sup>+</sup>, 20), 177 (70), 91 (100), 65 (20).

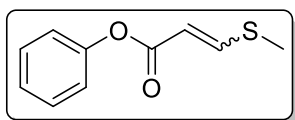

**Phenyl 3-(methylthio)acrylate (3aj).** The representative procedure was followed using phenyl 3,3,3-trifluoropropanoate (**1a**) (40.83 mg, 0.20 mmol) and 1,2-dimethyldisulfane (**2j**) (28.26 mg, 0.30 mmol). Isolation by column chromatography (*n*-hexane : EtOAc = 20 : 1) yielded **3aj** (32.24 mg, 83 %) as a colorless liquid, *E*:*Z* = 95:5. <sup>1</sup>H NMR (500 MHz, CDCl<sub>3</sub>) δ 7.97 (d, *J* = 15.0 Hz, 1H), 7.40 – 7.37 (m, 2H), 7.24 – 7.21 (m, 1H), 7.13 – 7.11 (m, 2H), 6.07 (d, *J* = 10.0 Hz, 0.05H), 5.85 (d, *J* = 15.0 Hz, 1H), 2.40 (s, 3H). <sup>13</sup>C NMR (125 MHz, CDCl<sub>3</sub>) δ 163.53, 150.72, 149.46, 129.34, 125.61, 121.62, 112.10, 14.43. MS (EI) *m/z* (relative intensity): 194 (**M**<sup>+</sup>, 20), 101 (100), 73 (30).

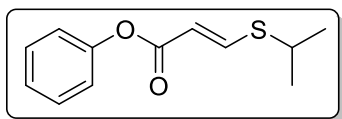

**Phenyl (*E*)-3-(isopropylthio)acrylate (3ak).** The representative procedure was followed using phenyl 3,3,3-trifluoropropanoate (**1a**) (40.83 mg, 0.20 mmol) and 1,2-diisopropylsulfane (**2k**) (45.09 mg, 0.30 mmol). Isolation by column chromatography (*n*-hexane : EtOAc = 20 : 1) yielded **3ak** (29.79 mg, 67 %) as a colorless liquid, *E*:*Z* > 99:1. <sup>1</sup>H NMR (500 MHz, CDCl<sub>3</sub>) δ 7.93 (d, *J* = 15.0 Hz, 1H), 7.38 – 7.35 (m, 2H), 7.23 – 7.20 (m, 1H), 7.12 – 7.10 (m, 2H), 5.98 (d, *J* = 15.0 Hz, 1H), 3.35 (sept, *J* = 7.0 Hz, 1H), 1.40 (d, *J* = 7.0 Hz, 6H). <sup>13</sup>C NMR (125 MHz, CDCl<sub>3</sub>) δ 163.68, 150.68, 148.85, 129.26, 125.51, 121.57, 113.00, 36.80, 22.88. MS (EI) *m/z* (relative intensity): 222 (**M**<sup>+</sup>, 10), 129 (100), 87 (90).

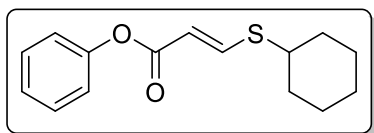

**Phenyl (*E*)-3-(cyclohexylthio)acrylate (3al).** The representative procedure was followed using phenyl 3,3,3-trifluoropropanoate (**1a**) (40.83 mg, 0.20 mmol) and 1,2-dicyclohexyldisulfane (**2l**) (69.14 mg, 0.30 mmol). Isolation by column chromatography (*n*-hexane : EtOAc = 20 : 1) yielded **3al** (32.53 mg, 62 %) as a

colorless liquid, *E:Z* > 99:1. <sup>1</sup>H NMR (500 MHz, CDCl<sub>3</sub>) δ 7.86 (d, *J* = 15.0 Hz, 1H), 7.31 – 7.28 (m, 2H), 7.16 – 7.13 (m, 1H), 7.05 – 7.02 (m, 2H), 5.92 (d, *J* = 15.0 Hz, 1H), 3.09 – 3.04 (m, 1H), 1.75 – 1.70 (m, 2H), 1.45 – 1.18 (m, 6H). <sup>13</sup>C NMR (125 MHz, CDCl<sub>3</sub>) δ 163.76, 150.71, 149.00, 129.28, 125.53, 121.61, 112.81, 45.16, 32.97, 25.70, 25.36. MS (EI) *m/z* (relative intensity): 262 (M<sup>+</sup>, 10), 169 (90), 87 (100).

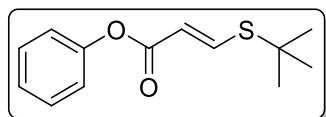

**Phenyl (*E*)-3-(*tert*-butylthio)acrylate (3am).** The representative procedure was followed using phenyl 3,3,3-trifluoropropanoate (**1a**) (40.83 mg, 0.20 mmol) and 1,2-*di-tert*-butyldisulfane (**2m**) (53.51 mg, 0.30 mmol). Isolation by column chromatography (*n*-hexane : EtOAc = 20 : 1) yielded **3am** (37.81 mg, 80 %) as a colorless liquid, *E:Z* > 99:1. <sup>1</sup>H NMR (500 MHz, CDCl<sub>3</sub>) δ 8.05 (d, *J* = 15.0 Hz, 1H), 7.40 – 7.36 (m, 2H), 7.24 – 7.21 (m, 1H), 7.12 – 7.10 (m, 2H), 6.12 (d, *J* = 15.0 Hz, 1H), 1.46 (s, 9H). <sup>13</sup>C NMR (125 MHz, CDCl<sub>3</sub>) δ 163.85, 150.77, 147.96, 129.31, 125.58, 121.66, 114.26, 45.62, 31.02. MS (EI) *m/z* (relative intensity): 236 (M<sup>+</sup>, 20), 143 (50), 94 (30), 87 (100), 57 (40).

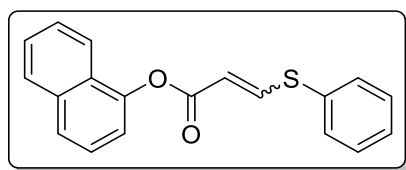

**Naphthalen-1-yl 3-(phenylthio)acrylate (3ba).** The representative procedure was followed using naphthalen-1-yl 3,3,3-trifluoropropanoate (**1b**) (50.84 mg, 0.20 mmol) and 1,2-diphenyldisulfane (**2a**) (65.45 mg, 0.30 mmol). Isolation by column chromatography (*n*-hexane : EtOAc = 20 : 1) yielded **3ba** (42.89 mg, 70 %) as a white solid, *E:Z* = 95:5. <sup>1</sup>H NMR (500 MHz, CDCl<sub>3</sub>) δ 7.96 (d, *J* = 15.0 Hz, 1H), 7.74 – 7.71 (m, 2H), 7.69 – 7.67 (m, 1H), 7.46 – 7.42 (m, 3H), 7.37 – 7.35 (m, 2H), 7.34 – 7.32 (m, 3H), 7.15 – 7.12 (m, 1H), 6.40 – 6.39 (m, 1H), 6.08 (d, *J* = 10.0 Hz, 0.05H), 5.76 (d, *J* = 15.0 Hz, 1H). <sup>13</sup>C NMR (125 MHz, CDCl<sub>3</sub>) δ 163.70, 149.71, 148.26, 133.66, 133.18,



131.31, 129.80, 129.77, 129.43, 129.26, 127.67, 127.55, 126.42, 125.55, 121.14, 118.46, 114.21. **MS** (EI) *m/z* (relative intensity): 306 ( $M^+$ , 20), 163 (100), 143 (10), 135 (20).

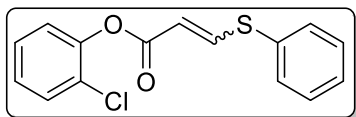

**2-Chlorophenyl 3-(phenylthio)acrylate (3ca).** The representative procedure was followed using 2-chlorophenyl 3,3,3-trifluoropropanoate (**1c**) (50.84 mg, 0.20 mmol) and 1,2-diphenyldisulfane (**2a**) (65.45 mg, 0.30 mmol). Isolation by column chromatography (*n*-hexane : EtOAc = 20 : 1) yielded **3ca** (41.87 mg, 72 %) as a white solid, *E:Z* = 88:12. **<sup>1</sup>H NMR (500 MHz, CDCl<sub>3</sub>)**  $\delta$  8.08 (d, *J* = 15.0 Hz, 1H), 7.53 – 7.51 (m, 2H), 7.44 – 7.40 (m, 4H), 7.27 – 7.23 (m, 1H), 7.17 – 7.12 (m, 2H), 6.18 (d, *J* = 10.0 Hz, 0.14H), 5.83 (d, *J* = 15.0 Hz, 1H). **<sup>13</sup>C NMR (125 MHz, CDCl<sub>3</sub>)**  $\delta$  162.48, 150.54, 146.89, 133.19, 131.11, 130.18, 129.78, 129.62, 129.48, 127.62, 126.83, 123.73, 113.26. **MS** (EI) *m/z* (relative intensity): 290 ( $M^+$ , 10), 163 (100), 154 (30), 135 (30).

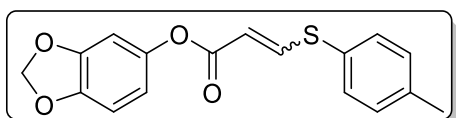

**Benzo[*d*][1,3]dioxol-5-yl 3-(*p*-tolylthio)acrylate (3da).** The representative procedure was followed using benzo[*d*][1,3]dioxol-5-yl 3,3,3-trifluoropropanoate (**1d**) (49.63 mg, 0.20 mmol) and 1,2-*di-p*-tolylidysulfane (**2b**) (73.92 mg, 0.30 mmol). Isolation by column chromatography (*n*-hexane : EtOAc = 10 : 1) yielded **3da** (45.90 mg, 73 %) as a white solid, *E:Z* = 80:20. **<sup>1</sup>H NMR (500 MHz, CDCl<sub>3</sub>)**  $\delta$  7.89 (d, *J* = 15.0 Hz, 1H), 7.34 – 7.32 (m, 2H), 7.18 – 7.16 (m, 2H), 6.70 – 6.67 (m, 1H), 6.53 – 6.52 (m, 1H), 6.44 – 6.42 (m, 1H), 5.90 – 5.89 (m, 2H), 5.62 (d, *J* = 15.0 Hz, 1H), 2.32 (s, 3H), 2.19 (s, 0.82H). **<sup>13</sup>C NMR (125 MHz, CDCl<sub>3</sub>)**  $\delta$  163.93, 150.27, 147.89, 145.19, 144.96, 139.94, 133.55, 130.59, 125.94, 113.93, 113.64, 107.89, 103.78, 101.61, 21.25. **MS** (EI) *m/z* (relative intensity): 314 ( $M^+$ , 20), 177 (100), 123 (20), 105 (10).

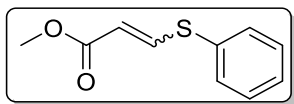

**Methyl 3-(phenylthio)acrylate (3ea).** The representative procedure was followed using methyl 3,3,3-trifluoropropanoate (**1e**) (28.42 mg, 0.20 mmol) and 1,2-diphenyldisulfane (**2a**) (65.45 mg, 0.30 mmol). Isolation by column chromatography (n-hexane : EtOAc = 20 : 1) yielded **3ea** (26.42 mg, 68 %) as a colorless oil, *E:Z* = 75:25.  $^1\text{H NMR}$  (500 MHz,  $\text{CDCl}_3$ )  $\delta$  7.72 (d,  $J$  = 15.0 Hz, 1H), 7.43 – 7.40 (m, 2H), 7.34 – 7.30 (m, 3H), 5.84 (d,  $J$  = 10.0 Hz, 0.30H), 5.59 (d,  $J$  = 15.0 Hz, 1H), 3.71 (s, 0.93H), 3.62 (s, 3H).  $^{13}\text{C NMR}$  (125 MHz,  $\text{CDCl}_3$ )  $\delta$  166.88, 165.62, 150.07, 147.19, 136.02, 132.93, 131.08, 130.40, 129.65, 129.13, 128.22, 115.12, 112.87, 51.46. **MS** (EI)  $m/z$  (relative intensity): 194 ( $\text{M}^+$ , 80), 163 (70), 135 (100), 109 (70), 91 (50).

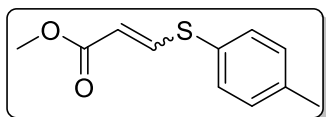

**Methyl 3-(*p*-tolylthio)acrylate (3eb).** The representative procedure was followed using methyl 3,3,3-trifluoropropanoate (**1e**) (28.42 mg, 0.20 mmol) and 1,2-*di-p*-tolylthio disulfane (**2b**) (73.92 mg, 0.30 mmol). Isolation by column chromatography (n-hexane : EtOAc = 20 : 1) yielded **3eb** (29.58 mg, 71 %) as a colorless oil, *E:Z* = 75:25.  $^1\text{H NMR}$  (500 MHz,  $\text{CDCl}_3$ )  $\delta$  7.69 (d,  $J$  = 15.0 Hz, 1H), 7.30 – 7.28 (m, 2H), 7.14 – 7.13 (m, 2H), 5.81 (d,  $J$  = 10.0 Hz, 0.3H), 5.51 (d,  $J$  = 15.0 Hz, 1H), 3.71 (s, 0.88H), 3.6 (s, 3H), 2.30 (s, 3H), 2.28 (s, 0.88H).  $^{13}\text{C NMR}$  (125 MHz,  $\text{CDCl}_3$ )  $\delta$  166.92, 165.69, 150.91, 147.88, 139.57, 133.30, 131.29, 130.44, 130.06, 126.49, 114.61, 112.50, 51.40, 21.20. **MS** (EI)  $m/z$  (relative intensity): 208 ( $\text{M}^+$ , 90), 177 (80), 149 (100), 123 (20).

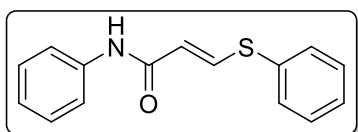

**(*E*)-*N*-Phenyl-3-(phenylthio)acrylamide (5aa).** The representative procedure was

followed using 3,3,3-trifluoro-*N*-phenylpropanamide (**4a**) (40.63 mg, 0.20 mmol) and 1,2-diphenyldisulfane (**2a**) (65.45 mg, 0.30 mmol). Isolation by column chromatography (*n*-hexane : EtOAc = 5 : 1) yielded **5aa** (44.43 mg, 87 %) as a white solid, *E:Z* > 99:1. <sup>1</sup>H NMR (500 MHz, CDCl<sub>3</sub>) δ 7.83 (d, *J* = 15.0 Hz, 1H), 7.53 – 7.48 (m, 4H), 7.43 – 7.39 (m, 3H), 7.32 – 7.28 (m, 2H), 7.15 (br, 1H), 7.11 – 7.08 (m, 1H), 5.78 (d, *J* = 15.0 Hz, 1H). <sup>13</sup>C NMR (125 MHz, CDCl<sub>3</sub>) δ 162.59, 144.14, 137.94, 132.52, 131.14, 129.58, 128.93, 128.82, 124.23, 119.92, 118.34. MS (EI) *m/z* (relative intensity): 255 (M<sup>+</sup>, 30), 163 (100), 135 (10), 109 (30), 91 (20).

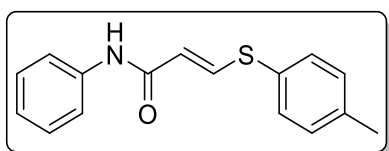

(*E*)-*N*-Phenyl-3-(*p*-tolylthio)acrylamide (**5ab**). The representative procedure was followed using 3,3,3-trifluoro-*N*-phenylpropanamide (**4a**) (40.63 mg, 0.20 mmol) and 1,2-di-*p*-tolylidylsulfane (**2b**) (73.92 mg, 0.30 mmol). Isolation by column chromatography (*n*-hexane : EtOAc = 5 : 1) yielded **5ab** (40.94 mg, 76 %) as a white solid, *E:Z* > 99:1. <sup>1</sup>H NMR (500 MHz, DMSO-*d*<sub>6</sub>) δ 9.90 (s, 1H), 7.63 (d, *J* = 15.0 Hz, 1H), 7.61 – 7.59 (m, 2H), 7.45 – 7.43 (m, 2H), 7.34 – 7.32 (m, 2H), 7.31 – 7.29 (m, 1H), 7.27 – 7.26 (m, 1H), 7.25 – 7.24 (m, 1H), 7.03 – 7.00 (m, 1H), 5.93 (d, *J* = 15.0 Hz, 1H), 2.35 (s, 3H). <sup>13</sup>C NMR (125 MHz, DMSO-*d*<sub>6</sub>) δ 162.49, 142.17, 139.72, 139.50, 135.18, 133.37, 131.10, 129.17, 126.98, 123.59, 119.55, 21.26. MS (EI) *m/z* (relative intensity): 269 (M<sup>+</sup>, 30), 177 (100), 123 (10).

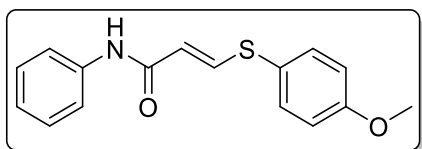

(*E*)-3-[(4-Methoxyphenyl)thio]-*N*-phenylacrylamide (**5an**). The representative procedure was followed using 3,3,3-trifluoro-*N*-phenylpropanamide (**4a**) (40.63 mg, 0.20 mmol) and 1,2-bis(4-methoxyphenyl)disulfane (**2n**) (83.51 mg, 0.30 mmol). Isolation by column chromatography (*n*-hexane : EtOAc = 3 : 1) yielded **5an** (41.66

mg, 73 %) as a white solid,  $E:Z > 99:1$ .  $^1\text{H NMR}$  (500 MHz,  $\text{CDCl}_3$ )  $\delta$  7.76 (d,  $J = 15.0$  Hz, 1H), 7.50 – 7.49 (m, 1H), 7.44 – 7.42 (m, 2H), 7.30 – 7.27 (m, 2H), 7.15 – 7.13 (m, 1H), 7.10 – 7.06 (m, 1H), 6.95 – 6.93 (m, 2H), 5.70 (d,  $J = 15.0$  Hz, 1H), 3.83 (s, 3H).  $^{13}\text{C NMR}$  (125 MHz,  $\text{CDCl}_3$ )  $\delta$  160.55, 146.91, 145.75, 137.98, 135.43, 128.94, 124.11, 120.72, 119.74, 117.20, 115.25, 55.41. **MS** (EI)  $m/z$  (relative intensity): 285 ( $\text{M}^+$ , 30), 165 (100), 146 (20), 139 (30).

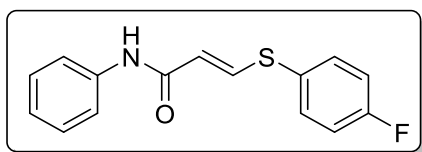

**(E)-3-[(4-Fluorophenyl)thio]-N-phenylacrylamide (5ac).** The representative procedure was followed using 3,3,3-trifluoro-*N*-phenylpropanamide (**4a**) (40.63 mg, 0.20 mmol) and 1,2-bis(4-fluorophenyl)disulfane (**2c**) (76.29 mg, 0.30 mmol). Isolation by column chromatography (*n*-hexane : EtOAc = 10 : 1) yielded **5ac** (41.55 mg, 76 %) as a white solid,  $E:Z > 99:1$ .  $^1\text{H NMR}$  (500 MHz,  $\text{DMSO-}d_6$ )  $\delta$  9.92 (s, 1H), 7.66 (d,  $J = 15.0$  Hz, 1H), 7.64 – 7.60 (m, 4H), 7.41 – 7.37 (m, 2H), 7.31 – 7.27 (m, 2H), 7.05 – 7.01 (m, 1H), 5.92 (d,  $J = 15.0$  Hz, 1H).  $^{13}\text{C NMR}$  (125 MHz,  $\text{DMSO-}d_6$ )  $\delta$  164.14, 162.37, 141.93, 139.67, 136.07, 129.18, 126.14, 123.64, 119.79, 119.57, 117.72.;  $^{19}\text{F NMR}$  (377 MHz,  $\text{DMSO-}d_6$ )  $\delta$  -111.82. **MS** (EI)  $m/z$  (relative intensity): 273 ( $\text{M}^+$ , 20), 181 (100), 153 (20), 133 (30).

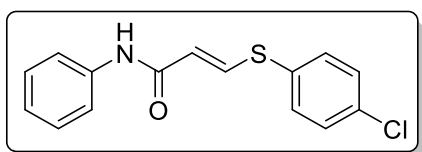

**(E)-3-[(4-Chlorophenyl)thio]-N-phenylacrylamide (5ad).** The representative procedure was followed using 3,3,3-trifluoro-*N*-phenylpropanamide (**4a**) (40.63 mg, 0.20 mmol) and 1,2-bis(4-chlorophenyl)disulfane (**2d**) (86.17 mg, 0.30 mmol). Isolation by column chromatography (*n*-hexane : EtOAc = 10 : 1) yielded **5ad** (41.73 mg, 72 %) as a white solid,  $E:Z > 99:1$ .  $^1\text{H NMR}$  (500 MHz,  $\text{DMSO-}d_6$ )  $\delta$  9.93 (s, 1H), 7.66 (d,  $J = 15.0$  Hz, 1H), 7.62 – 7.59 (m, 6H), 7.31 – 7.28 (m, 2H), 7.05 – 7.02 (m,

1H), 6.01 (d,  $J = 15.0$  Hz, 1H).  $^{13}\text{C}$  NMR (125 MHz, DMSO- $d_6$ )  $\delta$  162.30, 140.85, 139.62, 134.77, 134.50, 130.44, 129.84, 129.19, 123.69, 120.49, 119.59. MS (EI)  $m/z$  (relative intensity): 289 ( $\text{M}^+$ , 20), 169 (100), 156 (10), 146 (20).

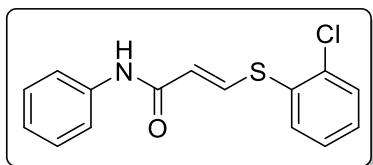

**(E)-3-[(2-Chlorophenyl)thio]-N-phenylacrylamide (5ae).** The representative procedure was followed using 3,3,3-trifluoro-*N*-phenylpropanamide (**4a**) (40.63 mg, 0.20 mmol) and 1,2-bis(2-chlorophenyl)disulfane (**2e**) (86.17 mg, 0.30 mmol). Isolation by column chromatography (*n*-hexane : EtOAc = 10 : 1) yielded **5ae** (41.15 mg, 71 %) as a white solid, *E*:*Z* > 99:1.  $^1\text{H}$  NMR (500 MHz,  $\text{CDCl}_3$ )  $\delta$  7.67 (d,  $J = 15.0$  Hz, 1H), 7.48 – 7.44 (m, 4H), 7.26 – 7.19 (m, 5H), 7.04 – 7.01 (m, 1H), 5.78 (d,  $J = 15.0$  Hz, 1H).  $^{13}\text{C}$  NMR (125 MHz,  $\text{CDCl}_3$ )  $\delta$  162.24, 141.62, 137.82, 137.81, 136.49, 133.79, 130.67, 130.34, 130.05, 129.00, 127.81, 124.38, 119.88. MS (EI)  $m/z$  (relative intensity): 289 ( $\text{M}^+$ , 20), 169 (100), 156 (10), 146 (20).

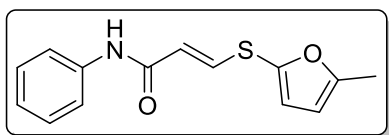

**(E)-3-[(5-Methylfuran-2-yl)thio]-N-phenylacrylamide (5ah).** The representative procedure was followed using 3,3,3-trifluoro-*N*-phenylpropanamide (**4a**) (40.63 mg, 0.20 mmol) and 1,2-bis(5-methylfuran-2-yl)disulfane (**2h**) (67.89 mg, 0.30 mmol). Isolation by column chromatography (*n*-hexane : EtOAc = 10 : 1) yielded **5ah** (37.34 mg, 72 %) as a yellow solid, *E*:*Z* > 99:1.  $^1\text{H}$  NMR (500 MHz, DMSO- $d_6$ )  $\delta$  9.92 (s, 1H), 7.79 – 7.78 (m, 1H), 7.62 – 7.60 (m, 2H), 7.50 (d,  $J = 15.0$  Hz, 1H), 7.30 – 7.27 (m, 2H), 7.04 – 7.01 (m, 1H), 6.60 – 6.59 (m, 1H), 5.82 (d,  $J = 15.0$  Hz, 1H), 2.32 (s, 3H).  $^{13}\text{C}$  NMR (125 MHz, DMSO- $d_6$ )  $\delta$  162.45, 156.38, 143.07, 141.18, 139.76, 129.15, 123.54, 119.52, 119.12, 115.08, 105.34, 12.06. MS (EI)  $m/z$  (relative intensity): 259 ( $\text{M}^+$ , 20), 146 (70), 139 (100), 113 (20).

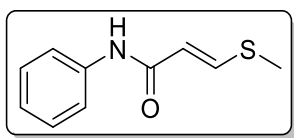

**(E)-3-(Methylthio)-N-phenylacrylamide (5aj).** The representative procedure was followed using 3,3,3-trifluoro-*N*-phenylpropanamide (**4a**) (40.63 mg, 0.20 mmol) and 1,2-dimethyldisulfane (**2j**) (28.26 mg, 0.30 mmol). Isolation by column chromatography (*n*-hexane : EtOAc = 10 : 1) yielded **5aj** (23.96 mg, 62 %) as a colorless oil, *E*:*Z* > 99:1.  $^1\text{H NMR}$  (500 MHz,  $\text{CDCl}_3$ )  $\delta$  7.68 (d,  $J = 15.0$  Hz, 1H), 7.49 – 7.48 (m, 3H), 7.25 – 7.22 (m, 2H), 7.04 – 7.00 (m, 1H), 5.74 (d,  $J = 15.0$  Hz, 1H), 2.24 (s, 3H).  $^{13}\text{C NMR}$  (125 MHz,  $\text{CDCl}_3$ )  $\delta$  162.75, 144.70, 138.10, 128.97, 124.18, 119.96, 115.85, 14.67. **MS** (EI)  $m/z$  (relative intensity): 193 ( $\text{M}^+$ , 40), 146 (10), 101 (100), 93 (60), 73 (40).

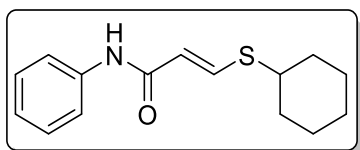

**(E)-3-(Cyclohexylthio)-N-phenylacrylamide (5al).** The representative procedure was followed using 3,3,3-trifluoro-*N*-phenylpropanamide (**4a**) (40.63 mg, 0.20 mmol) and 1,2-dicyclohexyldisulfane (**2l**) (69.13 mg, 0.30 mmol). Isolation by column chromatography (*n*-hexane : EtOAc = 5 : 1) yielded **5al** (33.98 mg, 65 %) as a colorless oil, *E*:*Z* > 99:1.  $^1\text{H NMR}$  (500 MHz,  $\text{CDCl}_3$ )  $\delta$  7.68 (d,  $J = 15.0$  Hz, 1H), 7.50 – 7.46 (m, 2H), 7.25 – 7.22 (m, 2H), 7.03 – 7.00 (m, 1H), 5.92 (d,  $J = 15.0$  Hz, 1H), 2.96 – 2.92 (m, 1H), 1.96 – 1.92 (m, 2H), 1.71 – 1.67 (m, 2H), 1.37 – 1.32 (m, 2H), 1.30 – 1.23 (m, 2H), 1.22 – 1.17 (m, 2H).  $^{13}\text{C NMR}$  (125 MHz,  $\text{CDCl}_3$ )  $\delta$  162.96, 146.64, 144.10, 138.13, 128.94, 124.10, 119.87, 45.59, 33.28, 25.76, 25.37. **MS** (EI)  $m/z$  (relative intensity): 261 ( $\text{M}^+$ , 20), 169 (70), 93 (80), 87 (100), 55 (30).

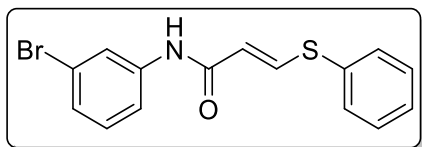

**(E)-N-(3-Bromophenyl)-3-(phenylthio)acrylamide (5ba).** The representative procedure was followed using *N*-(3-bromophenyl)-3,3,3-trifluoropropanamide (**4b**) (56.41 mg, 0.20 mmol) and 1,2-diphenyldisulfane (**2a**) (65.45 mg, 0.30 mmol). Isolation by column chromatography (*n*-hexane : EtOAc = 5 : 1) yielded **5ba** (38.10 mg, 57 %) as a white solid, *E*:*Z* > 99:1. <sup>1</sup>H NMR (500 MHz, CDCl<sub>3</sub>) δ 7.82 (d, *J* = 15.0 Hz, 1H), 7.76 (s, 1H), 7.49 – 7.48 (m, 2H), 7.42 – 7.39 (m, 4H), 7.35 – 7.33 (m, 1H), 7.22 – 7.19 (m, 1H), 5.75 (d, *J* = 15.0 Hz, 1H). <sup>13</sup>C NMR (125 MHz, CDCl<sub>3</sub>) δ 162.55, 145.27, 139.20, 132.73, 130.82, 130.22, 129.66, 129.03, 127.18, 122.57, 118.32, 117.54. MS (EI) *m/z* (relative intensity): 334 (**M**<sup>+</sup>, 20), 223 (60), 198 (100), 135 (30).

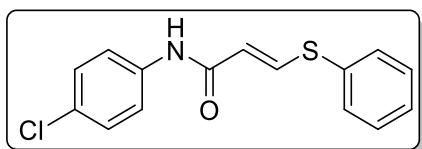

**(E)-N-(4-Chlorophenyl)-3-(phenylthio)acrylamide (5ca).** The representative procedure was followed using *N*-(4-chlorophenyl)-3,3,3-trifluoropropanamide (**4c**) (47.52 mg, 0.20 mmol) and 1,2-diphenyldisulfane (**2a**) (65.45 mg, 0.30 mmol). Isolation by column chromatography (*n*-hexane : EtOAc = 5 : 1) yielded **5ca** (35.93 mg, 62 %) as a white solid, *E*:*Z* > 99:1. <sup>1</sup>H NMR (500 MHz, CDCl<sub>3</sub>) δ 7.82 (d, *J* = 15.0 Hz, 1H), 7.50 – 7.45 (m, 4H), 7.42 – 7.40 (m, 3H), 7.26 – 7.24 (m, 3H), 5.75 (d, *J* = 15.0 Hz, 1H). <sup>13</sup>C NMR (125 MHz, CDCl<sub>3</sub>) δ 162.40, 145.07, 136.48, 133.11, 132.82, 130.85, 129.68, 129.05, 129.00, 121.19, 117.58. MS (EI) *m/z* (relative intensity): 289 (**M**<sup>+</sup>, 50), 127 (100), 123 (40), 109 (30).

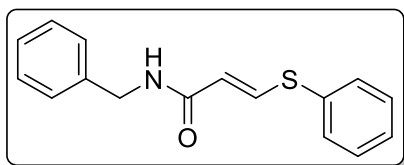

**(E)-N-Benzyl-3-(phenylthio)acrylamide (5da).** The representative procedure was

followed using *N*-benzyl-3,3,3-trifluoropropanamide (**4d**) (43.44 mg, 0.20 mmol) and 1,2-diphenyldisulfane (**2a**) (65.45 mg, 0.30 mmol). Isolation by column chromatography (*n*-hexane : EtOAc = 5 : 1) yielded **5da** (46.87 mg, 87 %) as a colorless oil, *E:Z* > 99:1. <sup>1</sup>H NMR (500 MHz, CDCl<sub>3</sub>) δ 7.69 (d, *J* = 15.0 Hz, 1H), 7.46 – 7.44 (m, 2H), 7.37 – 7.34 (m, 3H), 7.30 – 7.28 (m, 2H), 7.26 – 7.23 (m, 3H), 5.85 (br, 1H), 5.67 (d, *J* = 15.0 Hz, 1H), 4.42 (d, *J* = 5.5 Hz, 2H). <sup>13</sup>C NMR (125 MHz, CDCl<sub>3</sub>) δ 164.21, 142.64, 138.15, 132.48, 129.48, 128.66, 128.60, 127.79, 127.42, 121.78, 118.06, 43.57. MS (EI) *m/z* (relative intensity): 269 (M<sup>+</sup>, 10), 160 (100), 109 (20), 91 (30).

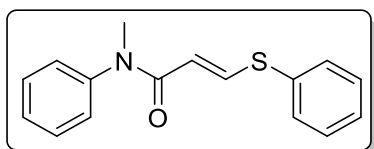

**(E)-N-Methyl-N-phenyl-3-(phenylthio)acrylamide (5ea).** The representative procedure was followed using 3,3,3-trifluoro-*N*-methyl-*N*-phenylpropanamide (**4e**) (43.44 mg, 0.20 mmol) and 1,2-diphenyldisulfane (**2a**) (65.45 mg, 0.30 mmol). Isolation by column chromatography (*n*-hexane : EtOAc = 5 : 1) yielded **5ea** (36.09 mg, 67 %) as a white solid, *E:Z* > 99:1. <sup>1</sup>H NMR (500 MHz, CDCl<sub>3</sub>) δ 7.72 (d, *J* = 15.0 Hz, 1H), 7.38 – 7.35 (m, 4H), 7.31 – 7.30 (m, 1H), 7.29 – 7.26 (m, 3H), 7.13 – 7.11 (m, 2H), 5.71 (d, *J* = 15.0 Hz, 1H), 3.32 (s, 3H). <sup>13</sup>C NMR (125 MHz, CDCl<sub>3</sub>) δ 164.54, 143.39, 142.99, 131.95, 131.80, 129.48, 129.27, 128.25, 127.39, 127.28, 116.90, 37.22. MS (EI) *m/z* (relative intensity): 269 (M<sup>+</sup>, 20), 163 (30), 135 (100), 109 (20).



## 5. Mechanistic studies

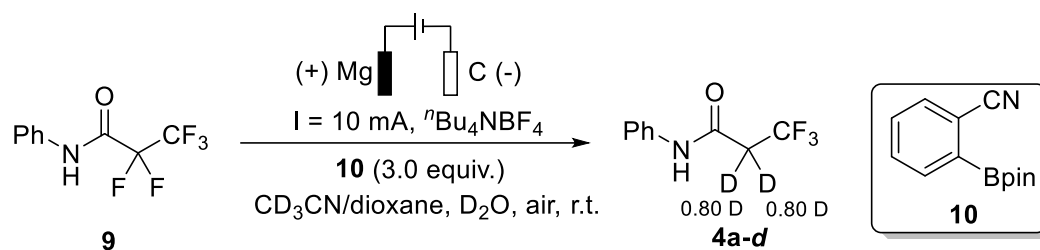

**General procedure for the synthesis of trifluoropropanamides  $\mathbf{4a-d}^3$ :** Primarily, the flask was equipped with one magnesium rod electrodes ( $\varphi = 6 \text{ mm}$ ) and graphite rod electrode ( $\varphi = 6 \text{ mm}$ ), the distance between which was approximately 2 cm. We use the imported sealing film to stick the magnesium rod and the carbon rod together only at both ends of the three bottles for several rounds, and then add the reaction in the glove box. To a 10 mL three-necked flask was added 2,2,3,3,3-pentafluoro-N-phenylpropanamide **9** (81.2 mg, 0.4 mmol) and electrolyte  ${}^n\text{Bu}_4\text{NBF}_4$  (0.5 mmol), followed by the reaction solvent (a mixture of 2.0 mL  $\text{CD}_3\text{CN}$  with 2.0 mL anhydrous 1,4-dioxane with 33  $\mu\text{L}$  of  $\text{D}_2\text{O}$ ) and boron reagent **10** (1.2 mmol). The constant current (10 mA) electrolysis was then performed at room temperature under nitrogen atmosphere with vigorous stirring for about 7 h (monitored by TLC analysis). Upon completion, the reaction mixture was poured into brine and extracted with DCM for three times. The combined organic layer was dried over anhydrous  $\text{Na}_2\text{SO}_4$ , and the solvent was then removed under reduced pressure. The resulting mixture was purified by column chromatography on silica gel to afford the desired product **4a-d** as a white solid; 80% deuterium incorporation was determined by  $^1\text{H NMR}$  (500 MHz,  $\text{CDCl}_3$ )  $\delta$  7.61 (br, 1H), 7.50 – 7.48 (m, 2H), 7.35 – 7.32 (m, 2H), 7.18 – 7.15 (m, 1H), 3.25 – 3.18 (m, 0.40H).  $^{13}\text{C NMR}$  (125 MHz,  $\text{CDCl}_3$ )  $\delta$  161.45, 136.78, 129.04, 125.36 125.03 (q,  $J = 273.75 \text{ Hz}$ ), 120.70. **MS** (EI)  $m/z$  (relative intensity): 205 ( $\text{M}^+$ , 30), 120 (100), 113 (10).

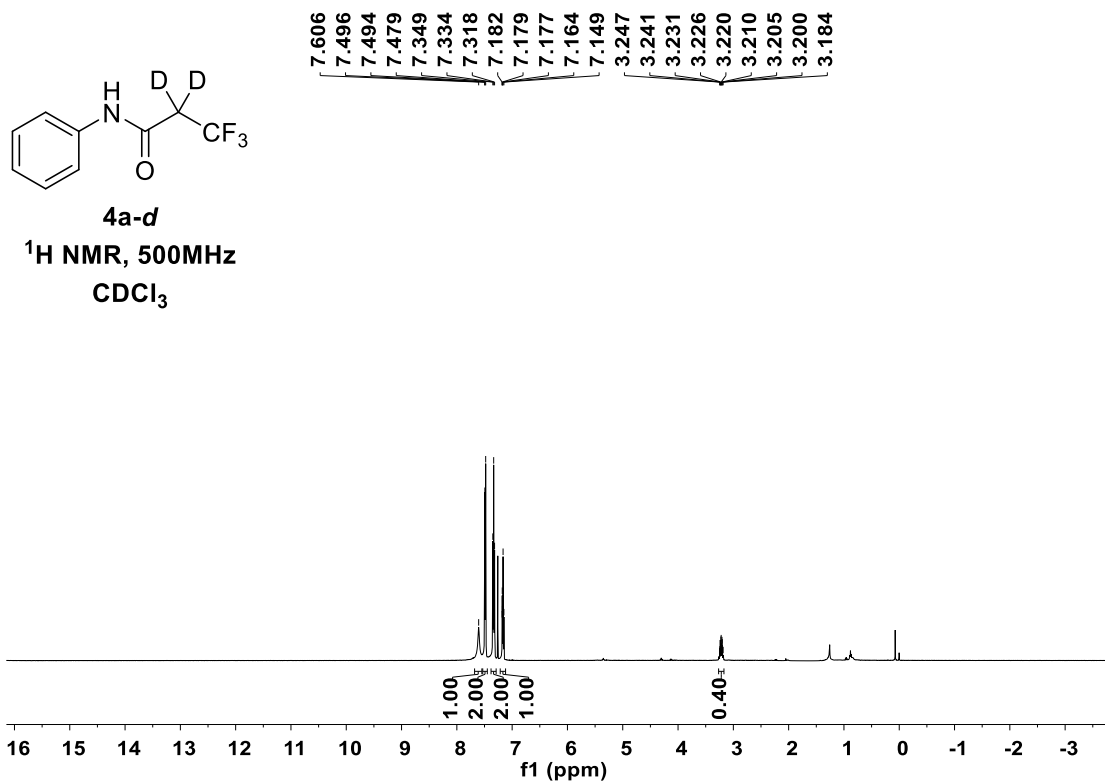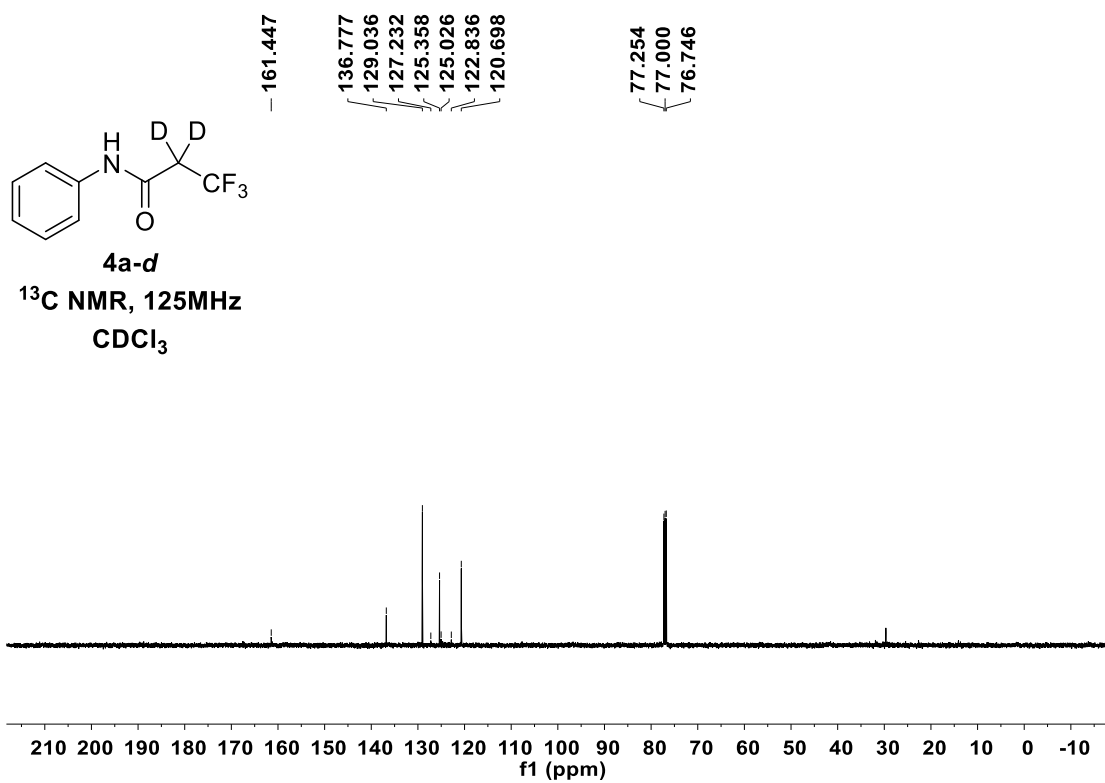

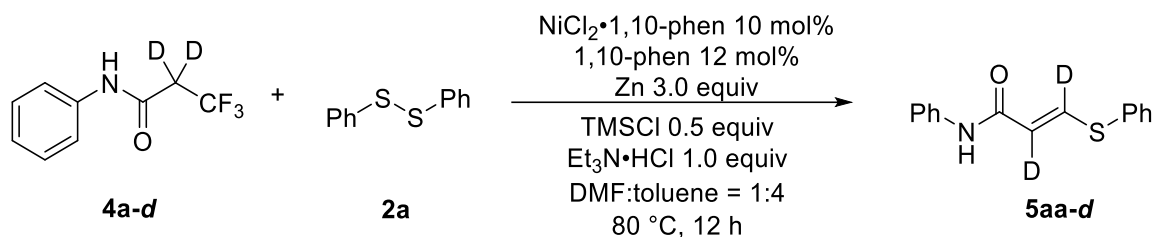

**General procedure for the Ni-catalysed reductive cross-coupling of Product 5aa-d:**

To a 10 mL Schlenk tube was added sequentially  $\text{NiCl}_2 \cdot 1,10\text{-phen}$  (6.20 mg, 0.02 mmol), 1,10-Phenanthroline (4.32 mg, 0.024 mmol), Zn power (32.90 mg, 0.6 mmol),  $\text{Et}_3\text{N} \cdot \text{HCl}$  (27.53 mg, 0.2 mmol) and 1,2-diphenyldisulfane **2a** (0.30 mmol). The vessel was evacuated and filled with argon (three times), toluene (0.40 mL) was added via syringe and the mixture was stirred at room temperature for 10 min. The deuterated trifluoropropanamide **4a-d** (0.20 mmol) was added, followed by the chlorotrimethylsilane (10.86 mg, 12.68  $\mu\text{L}$ , 0.10 mmol) in one portion. DMF (0.10 mL) was subsequently added via syringe. The resulting solution was stirred for 12 h at 80  $^\circ\text{C}$ . After this time, the crude reaction mixture was diluted with ethyl acetate (5 mL) and washed with water (2.0 mL). The organic layer was dried over  $\text{Na}_2\text{SO}_4$ , filtered, and concentrated. The residue was purified by flash chromatography. deuterium incorporation was determined by  $^1\text{H}$  NMR (500 MHz,  $\text{CDCl}_3$ )  $\delta$  7.75 (d,  $J = 15.0$  Hz, 0.38H), 7.44 – 7.42 (m, 4H), 7.34 – 7.33 (m, 3H), 7.24 – 7.21 (m, 2H), 7.10 (br, 1H), 7.03 – 7.00 (m, 1H), 5.72 (d,  $J = 15.0$  Hz, 0.29H).  $^{13}\text{C}$  NMR (125 MHz,  $\text{CDCl}_3$ )  $\delta$  162.39, 144.21, 137.92, 132.67, 131.12, 129.63, 128.98, 128.90, 124.27, 119.79, 118.15. MS (EI)  $m/z$  (relative intensity): 257 ( $\text{M}^+$ , 10), 137 (100), 120 (50).

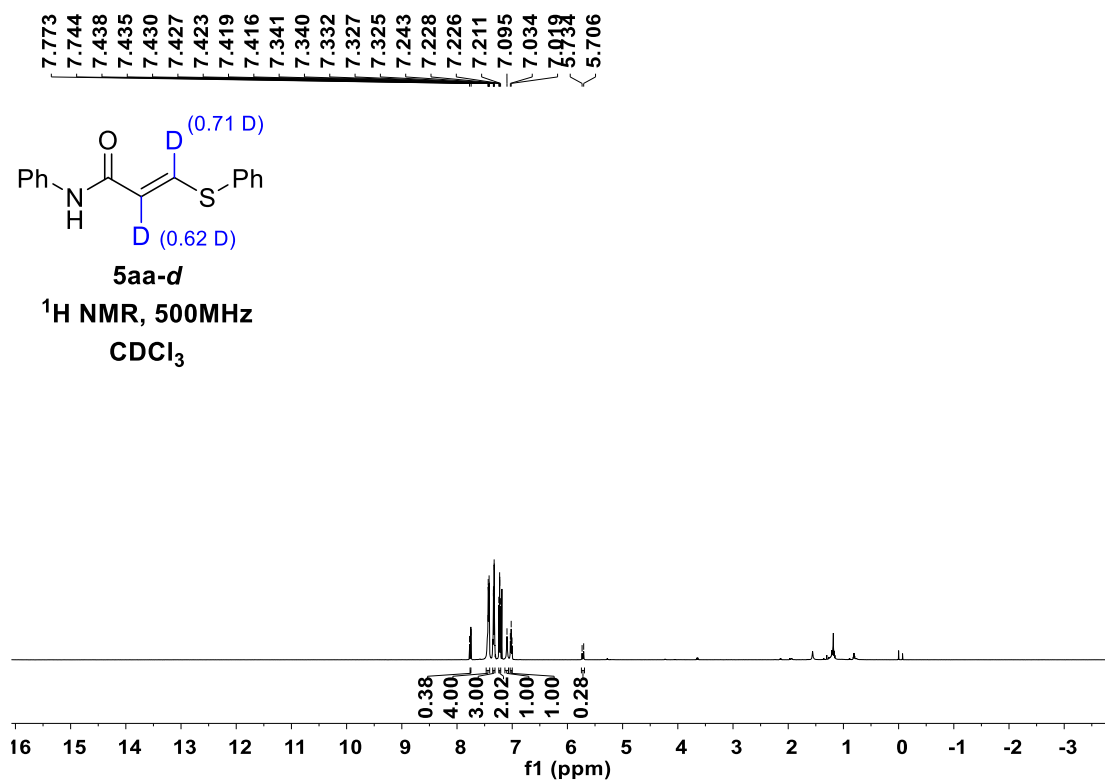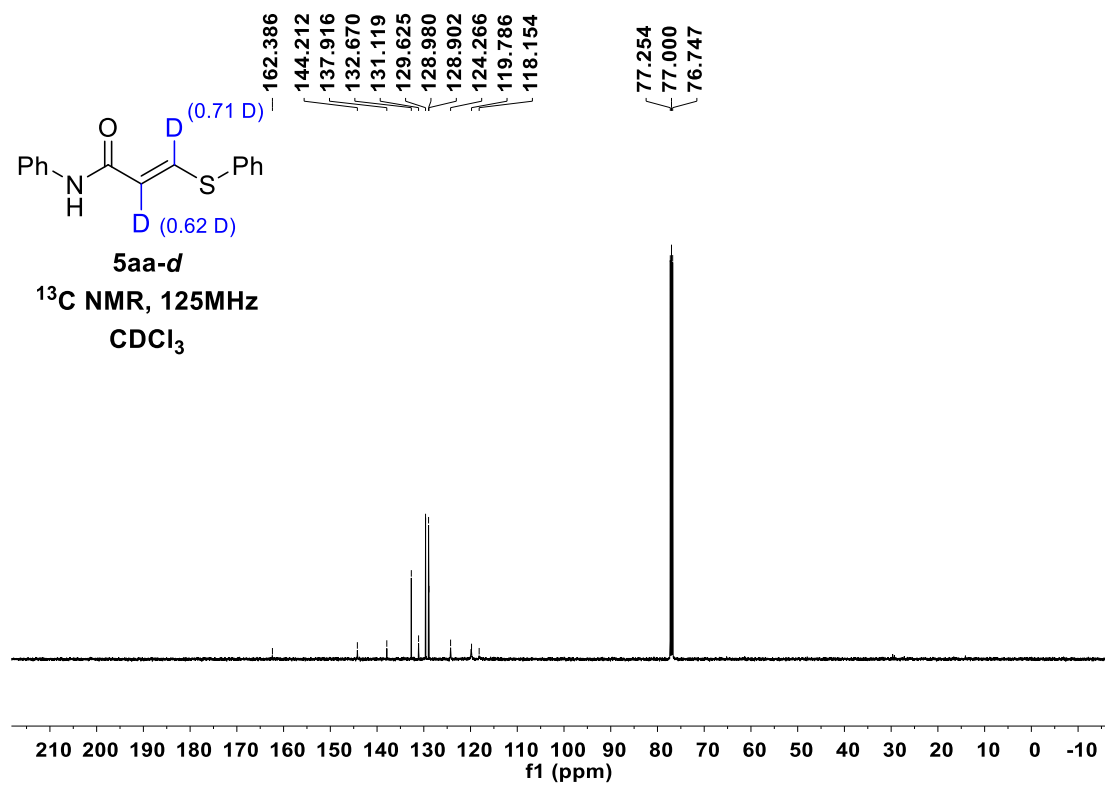



## 8. NMR Spectra

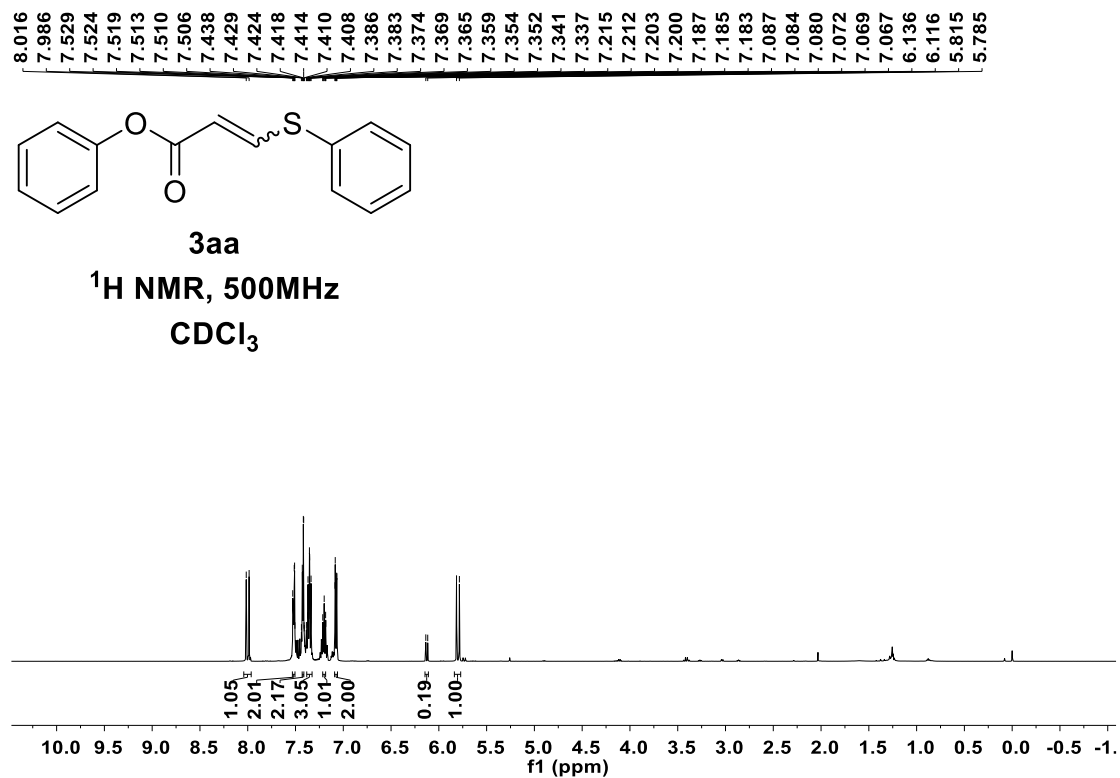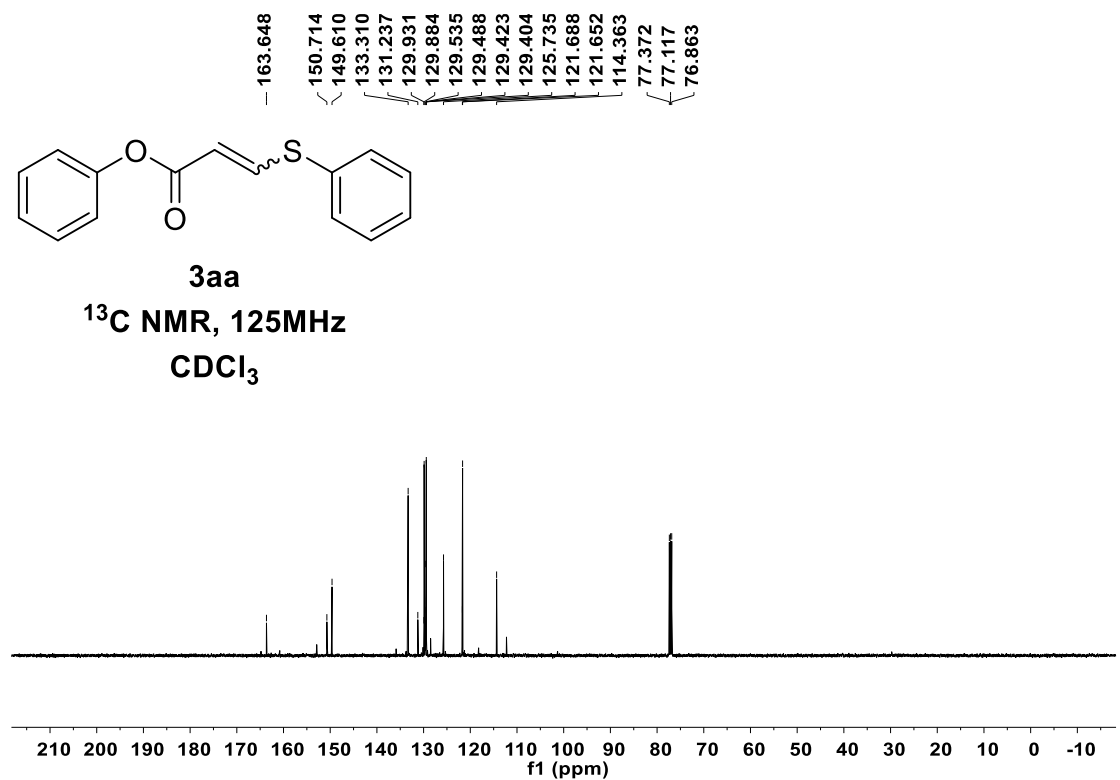

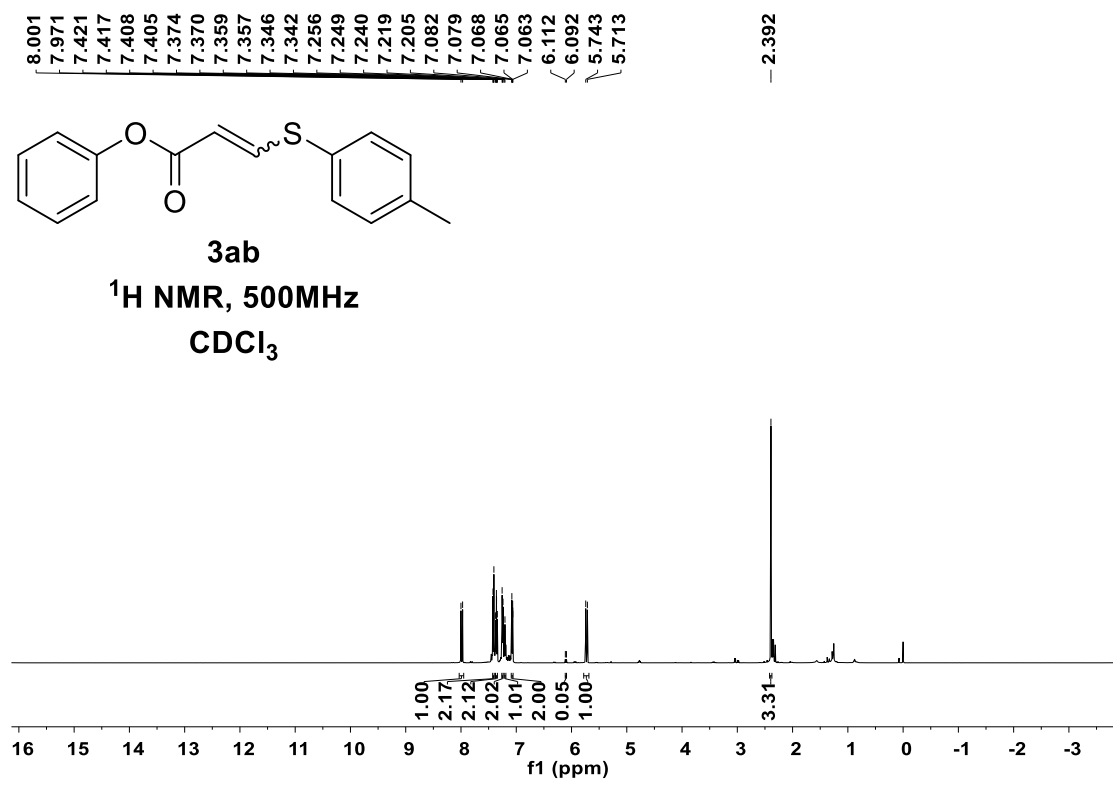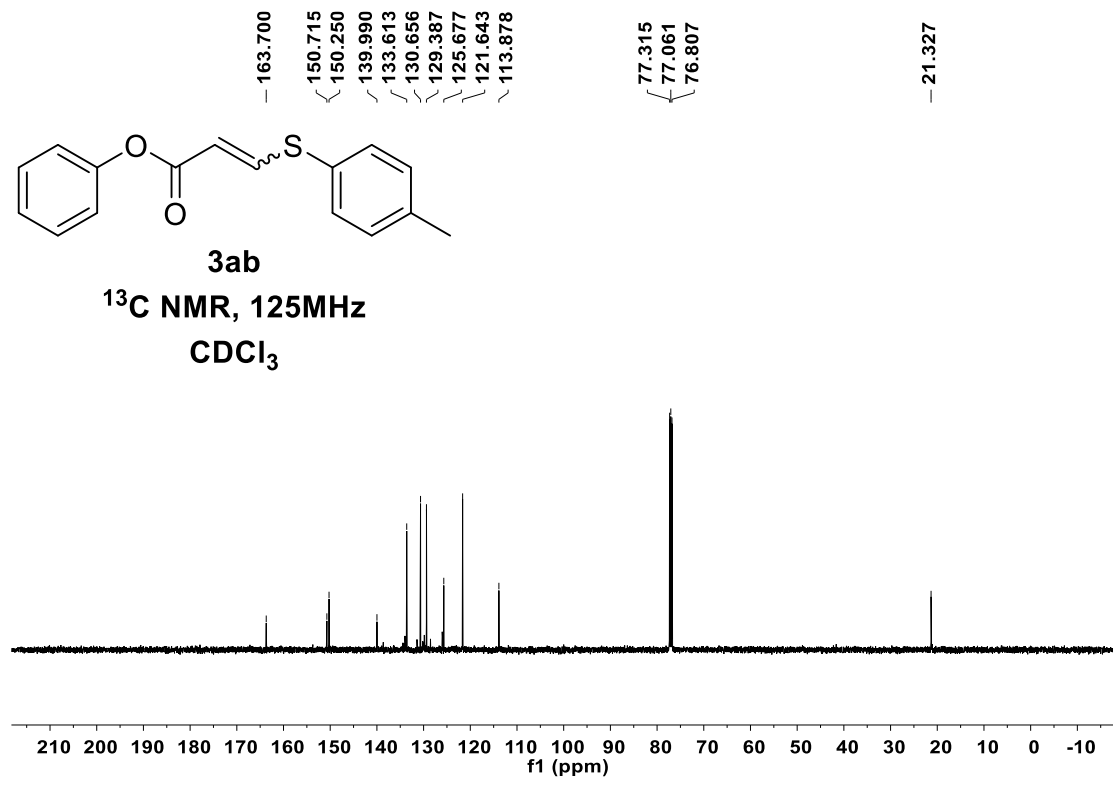

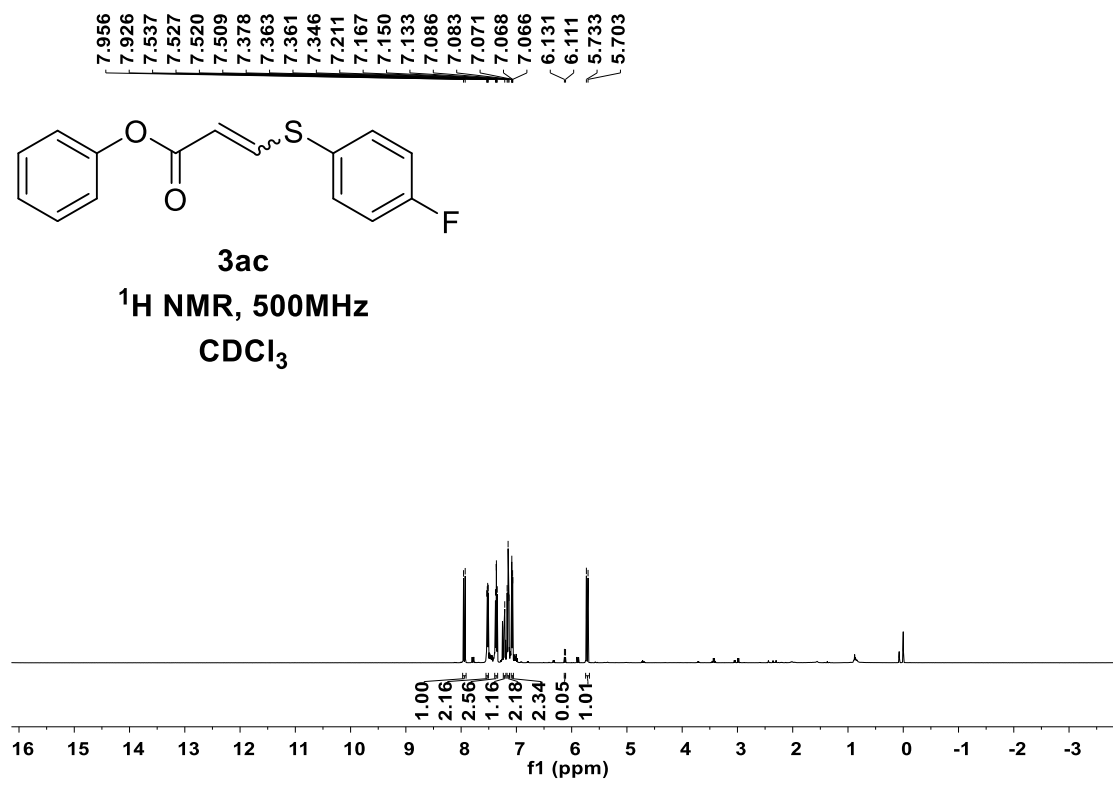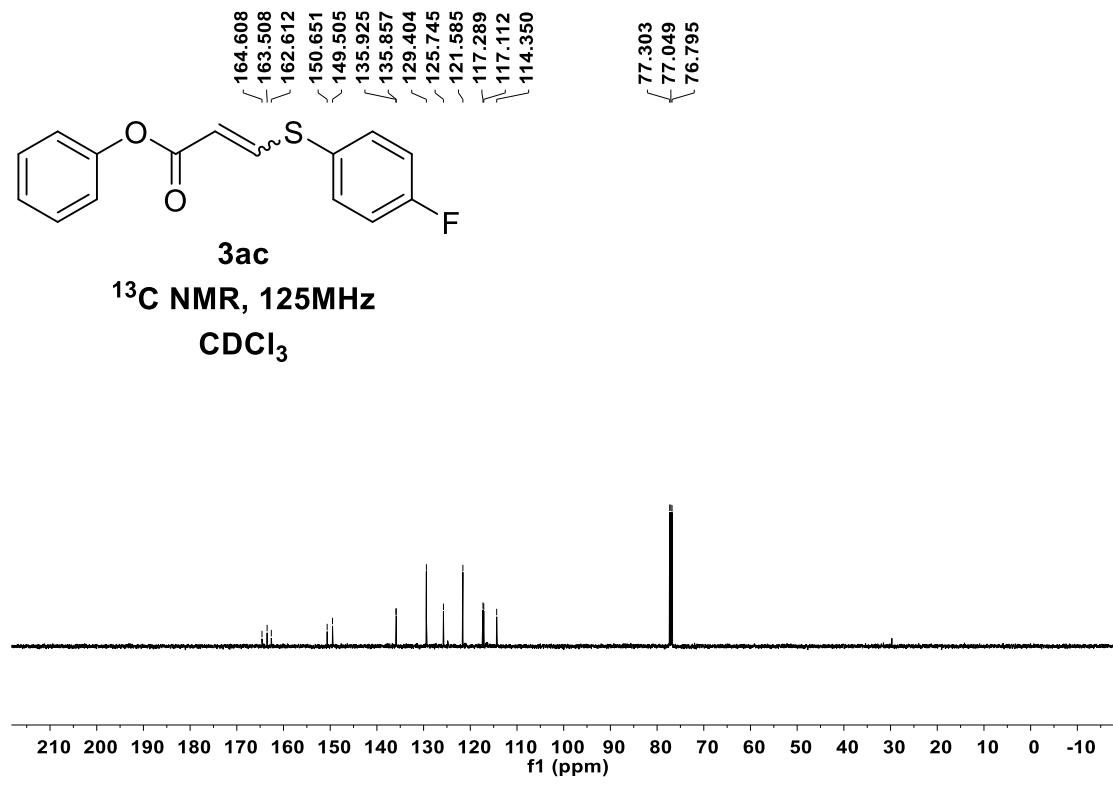



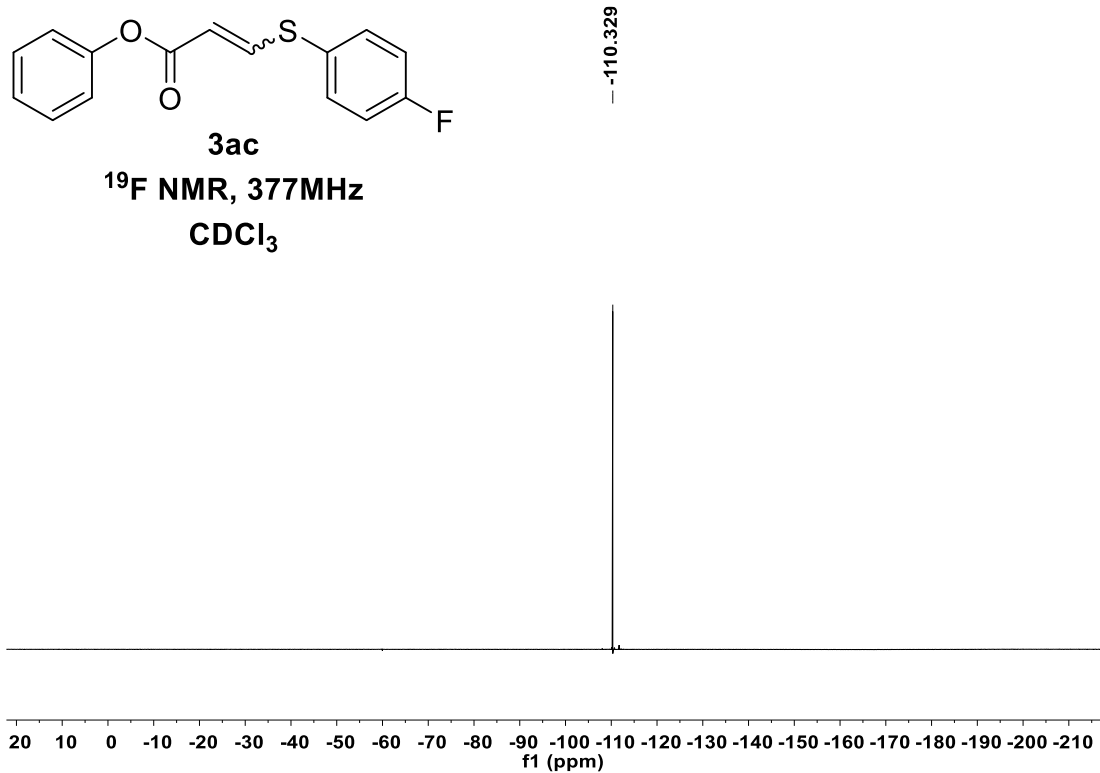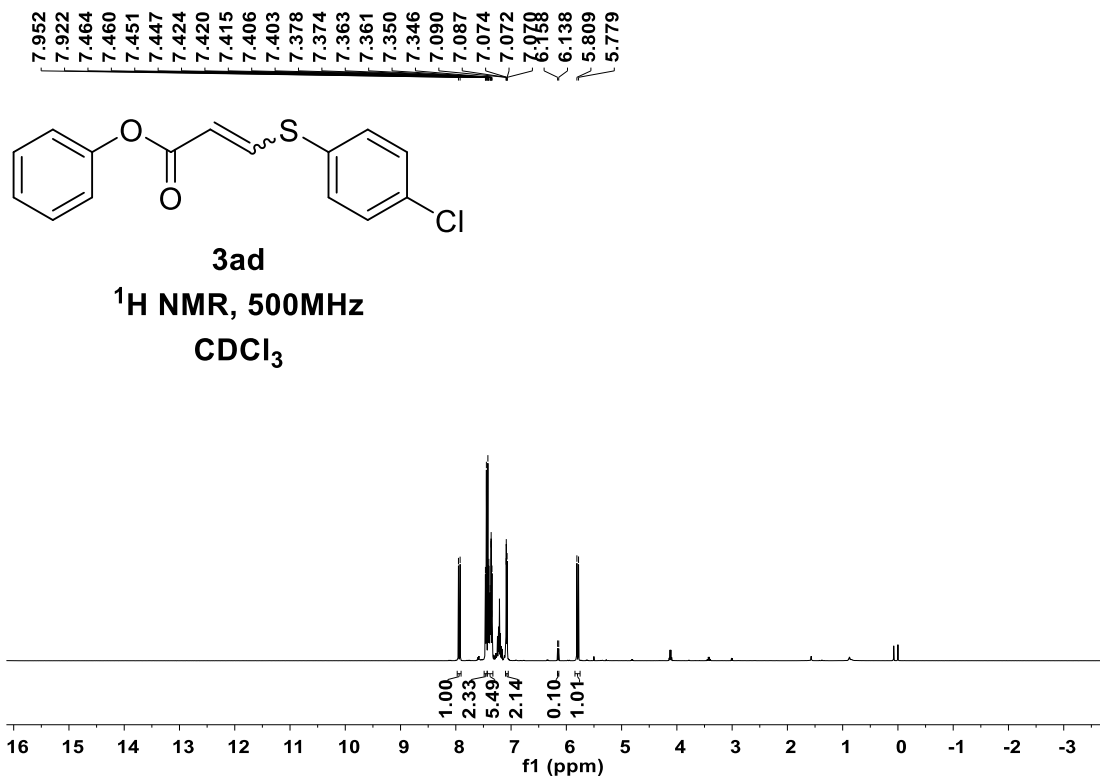

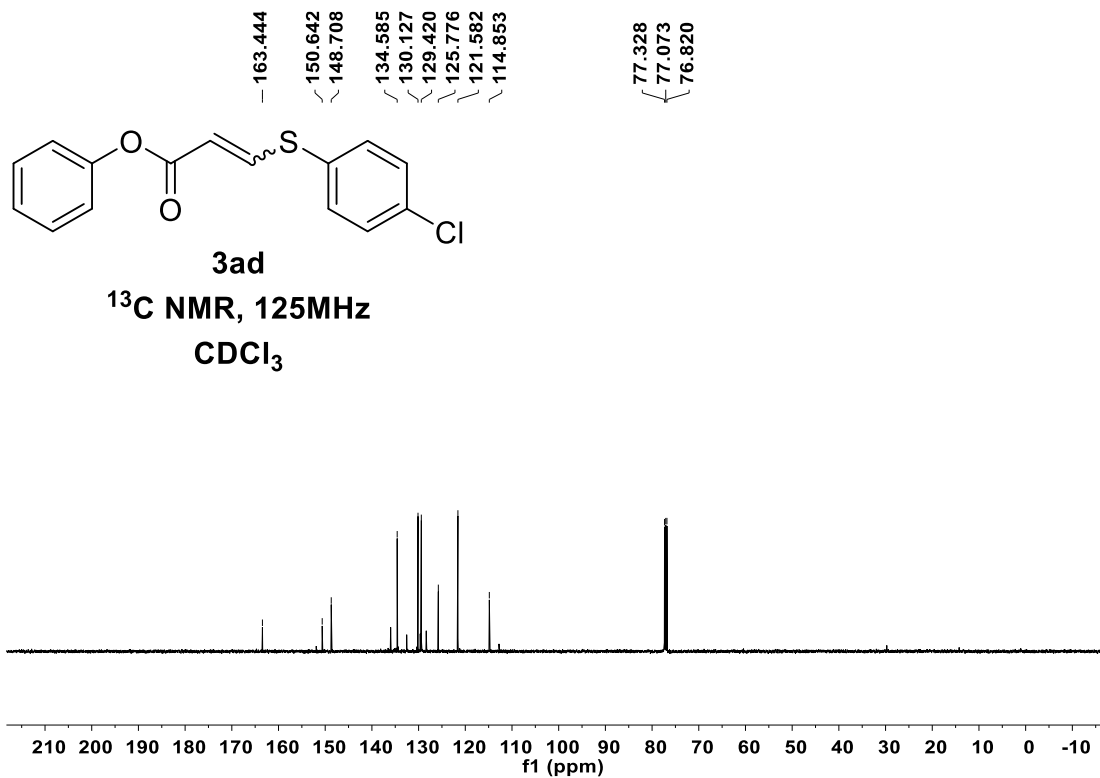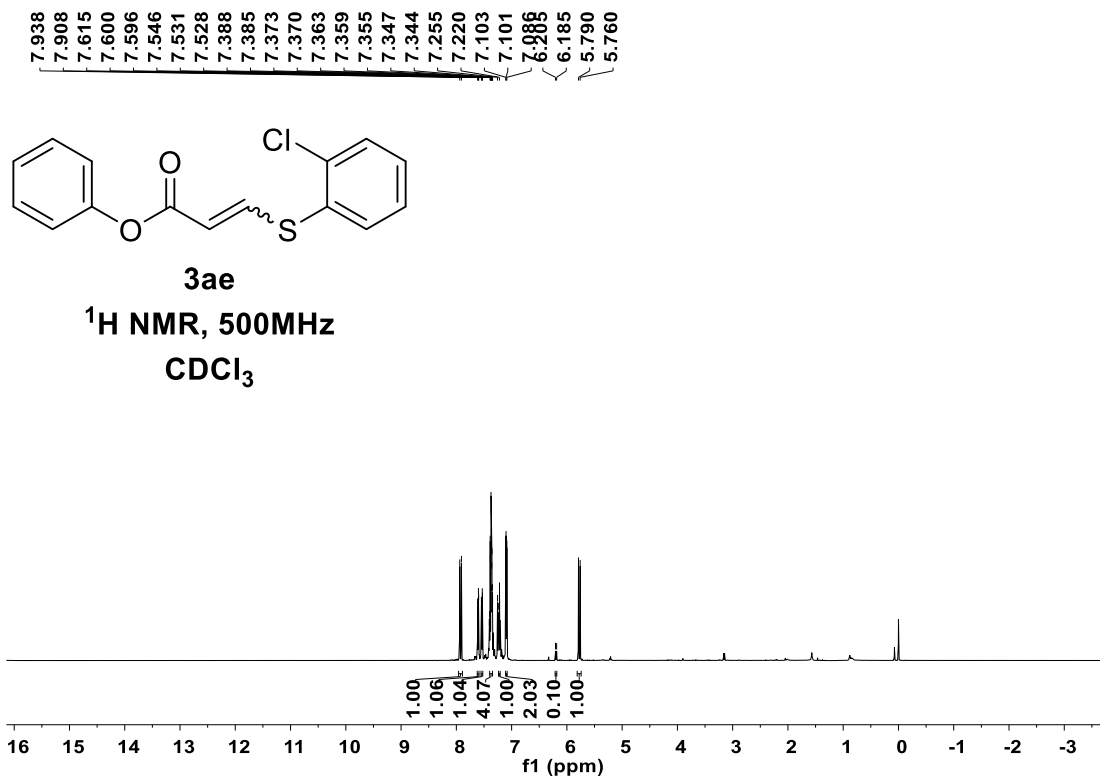

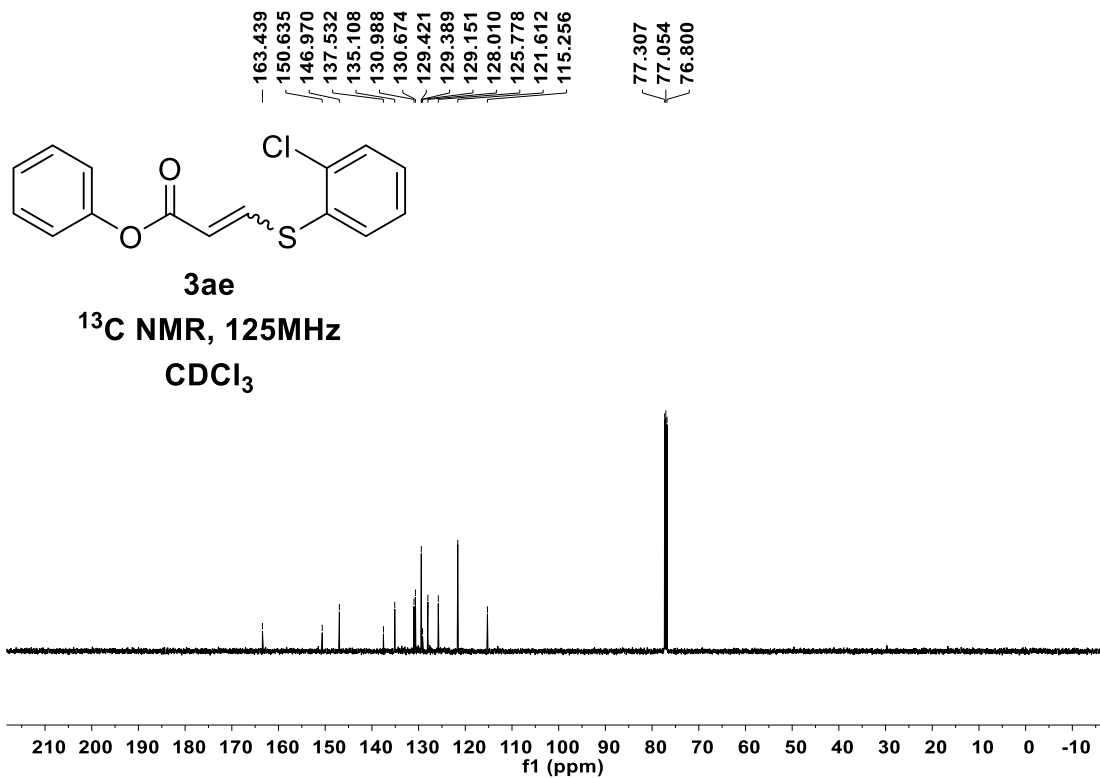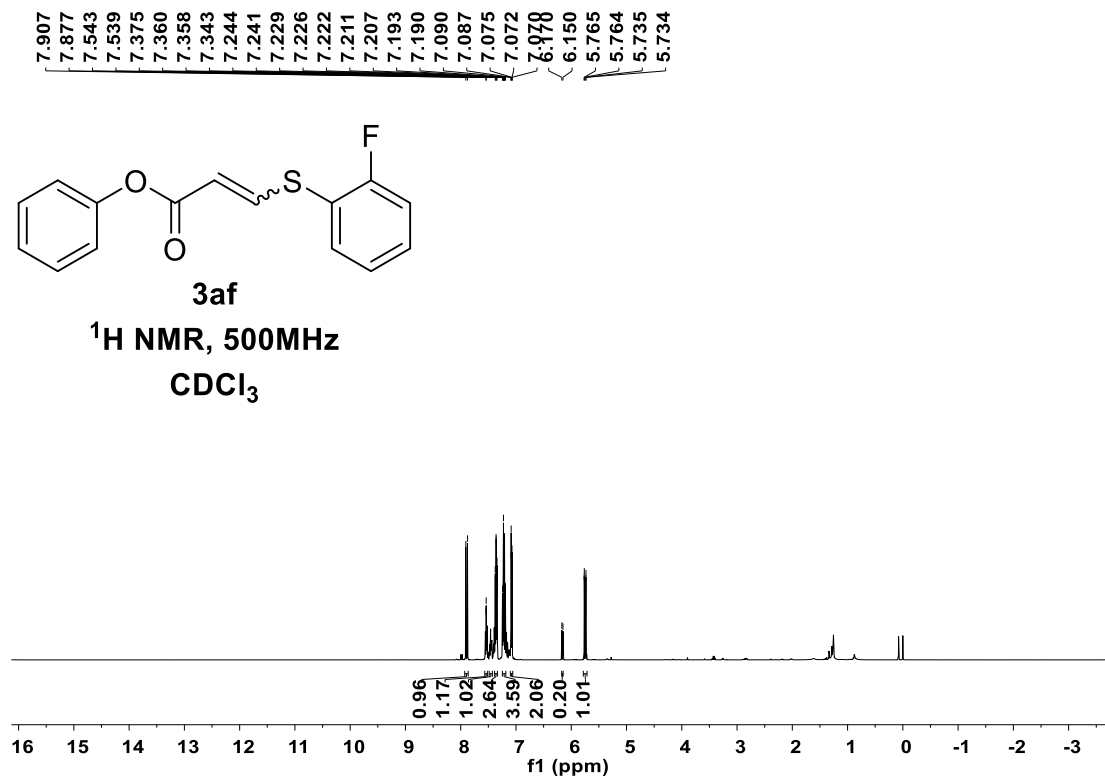

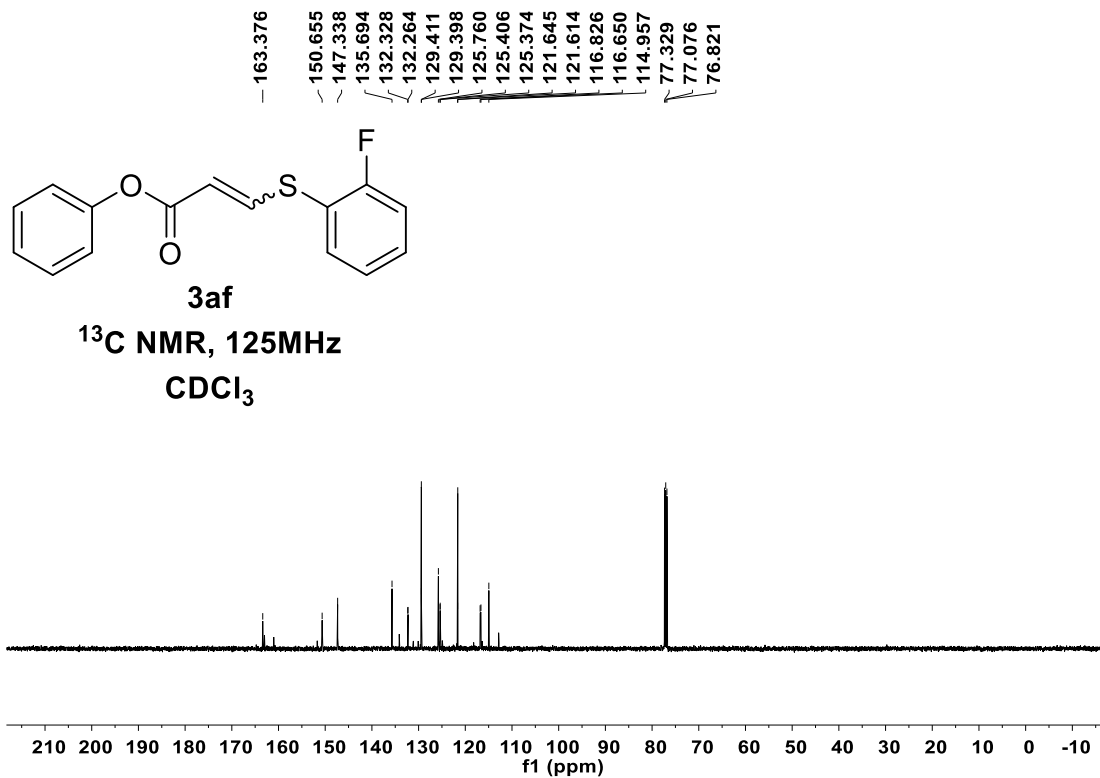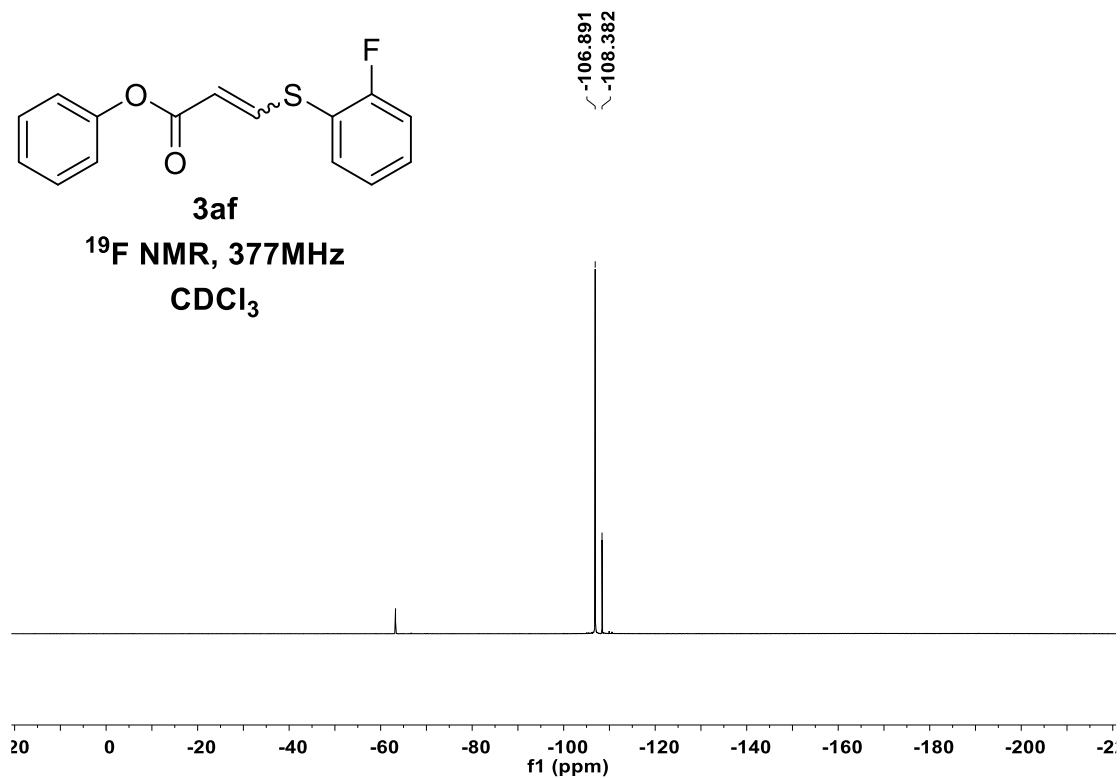

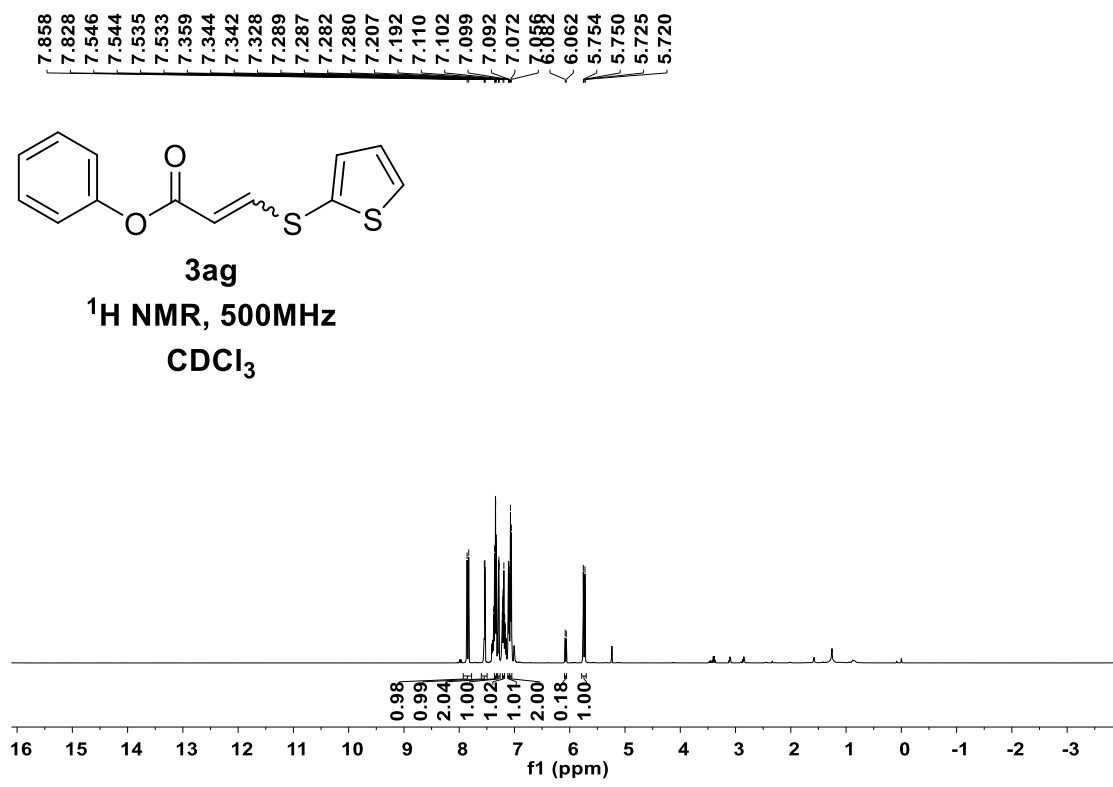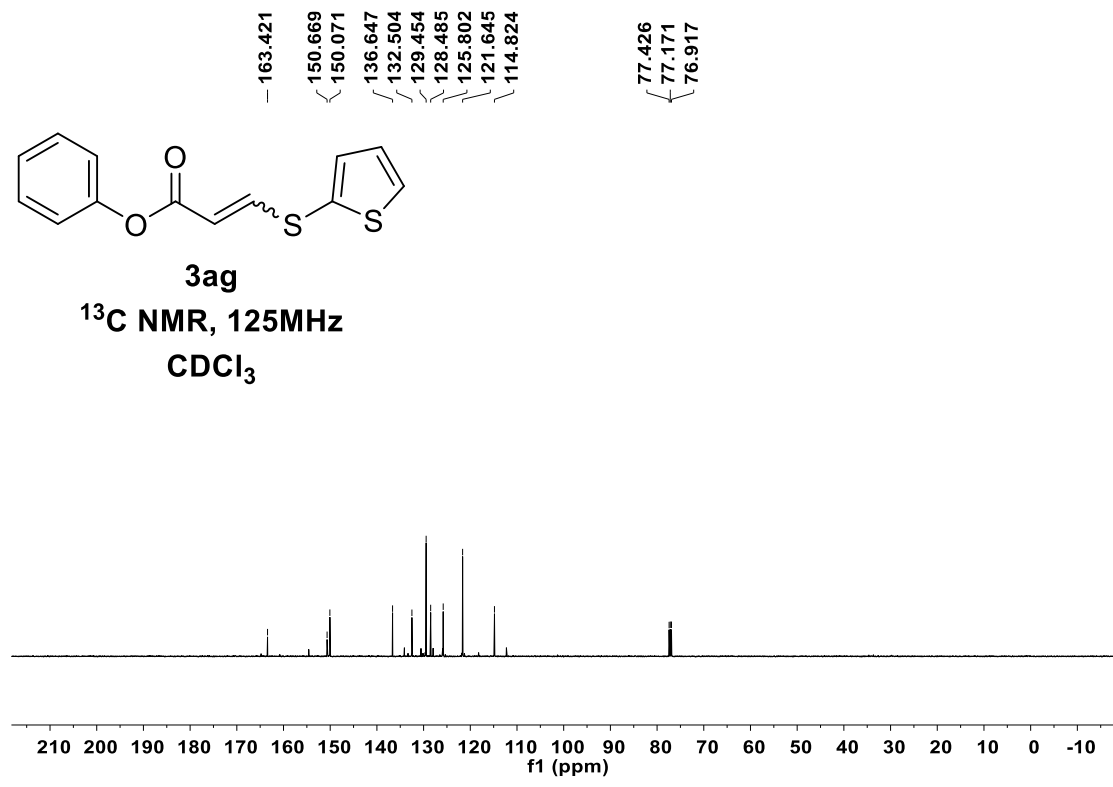

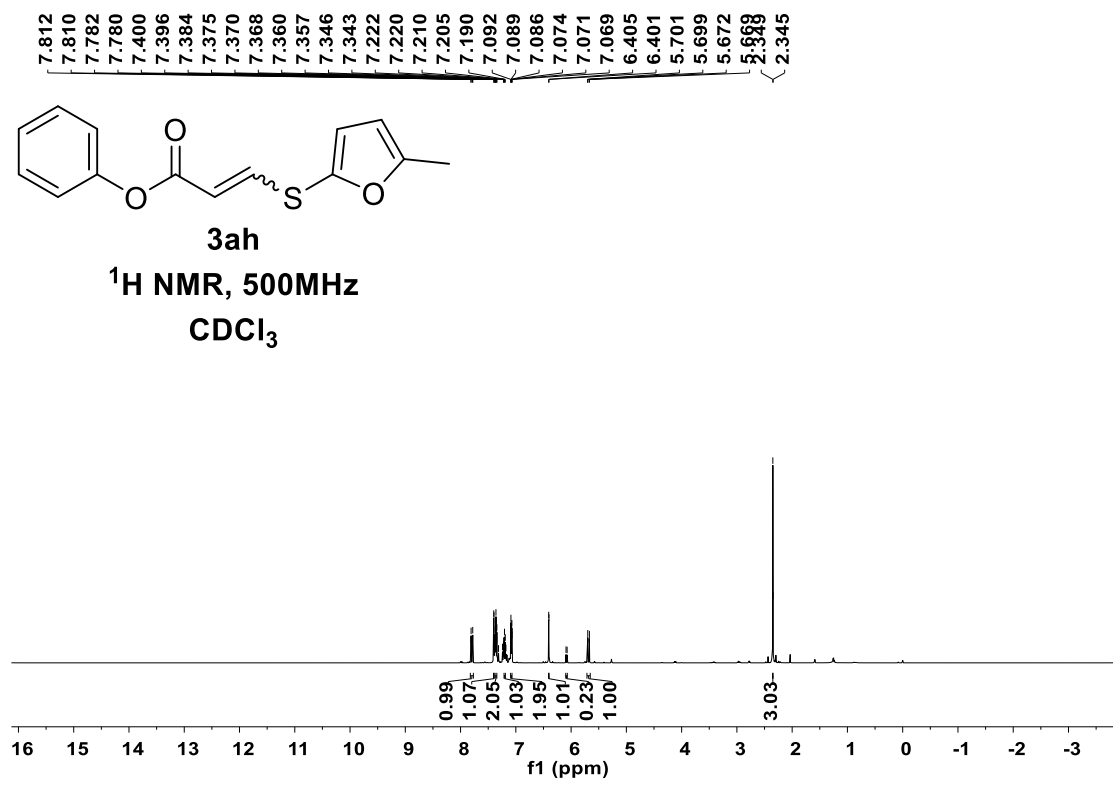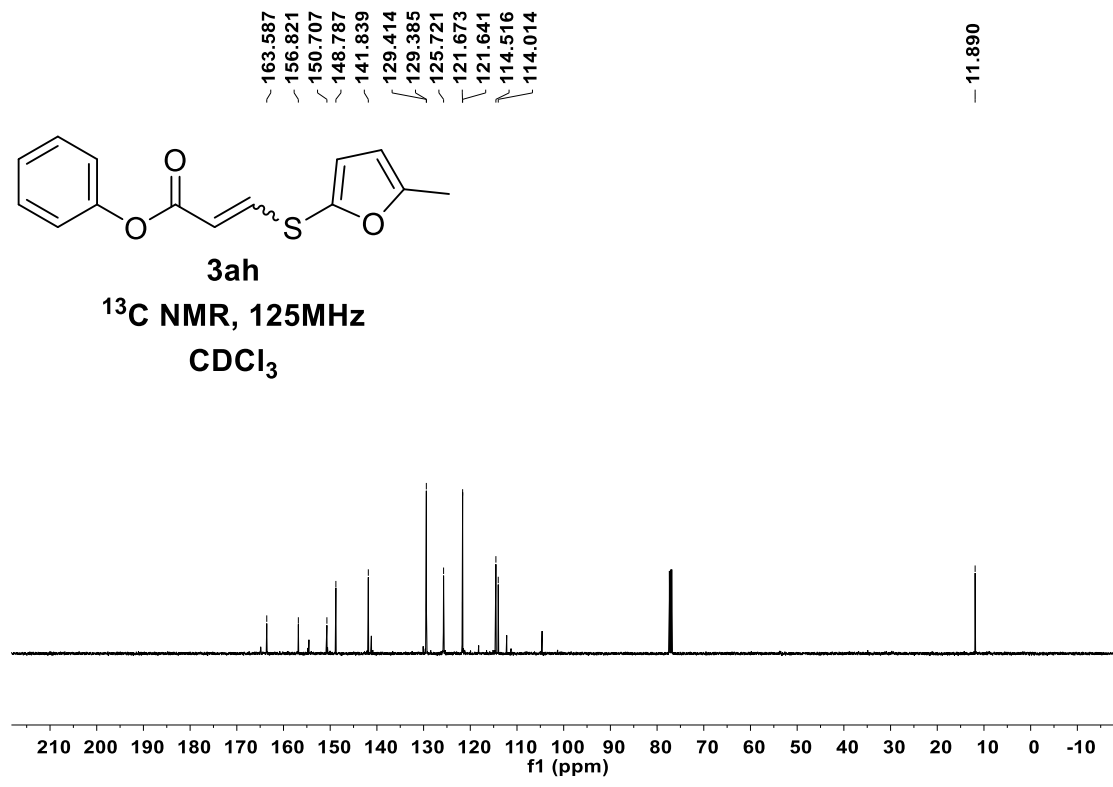

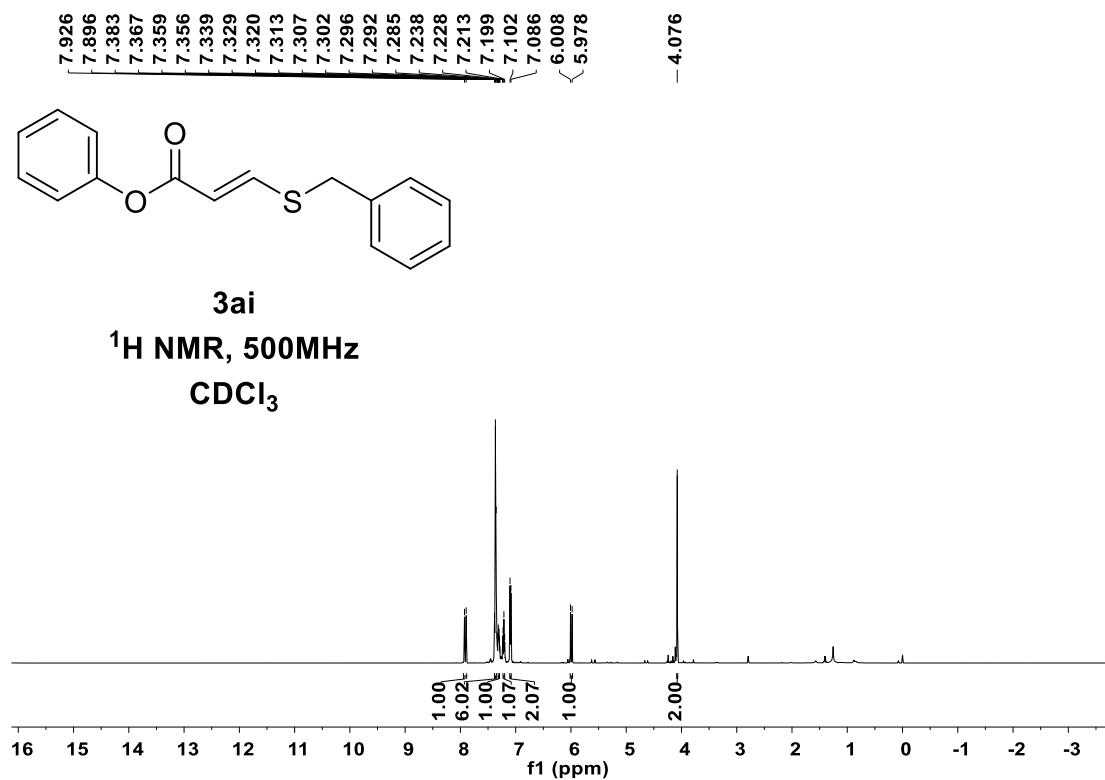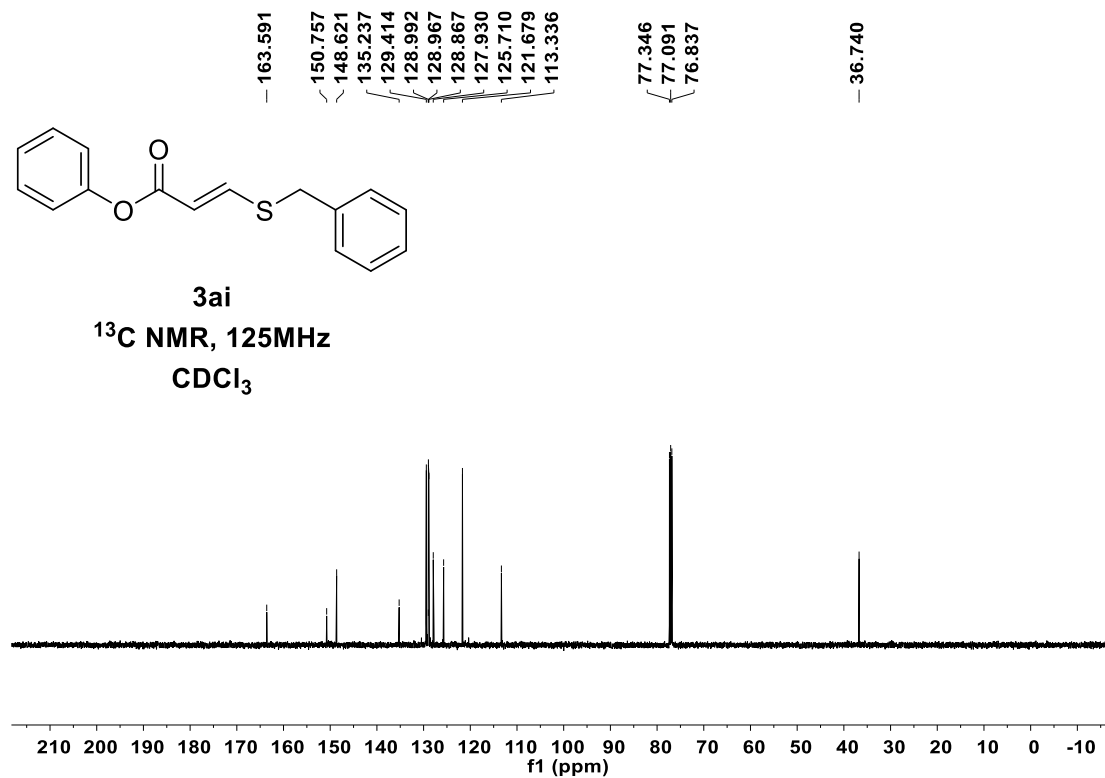

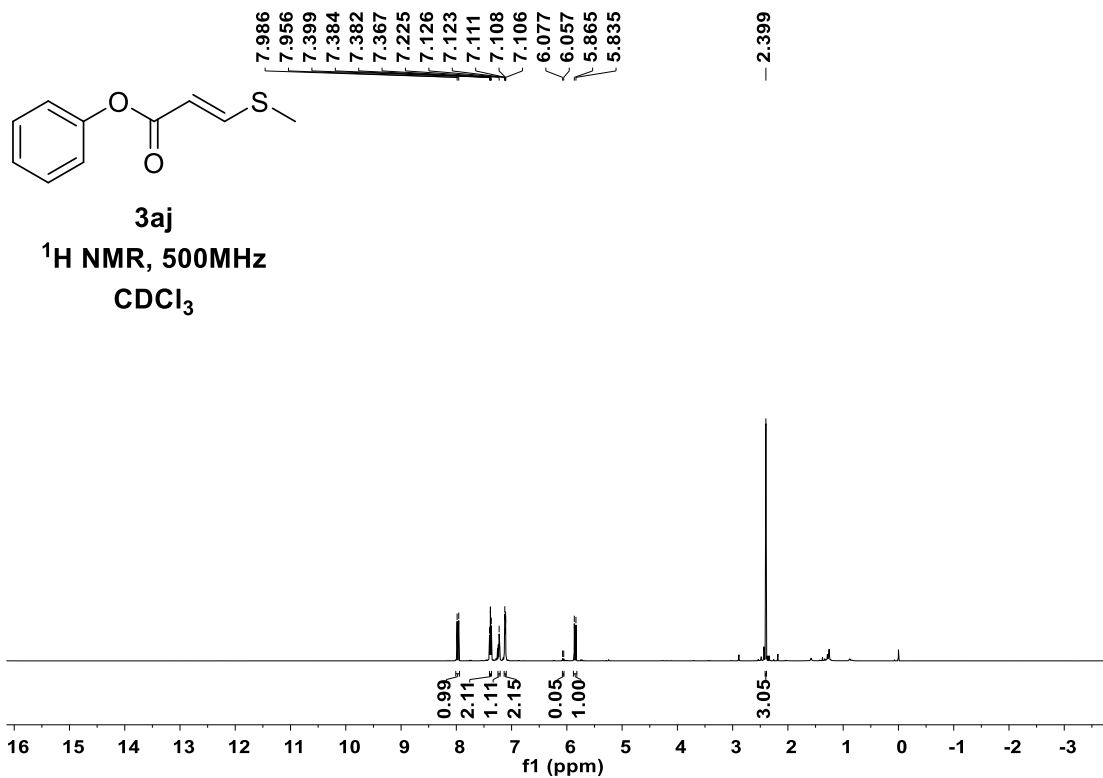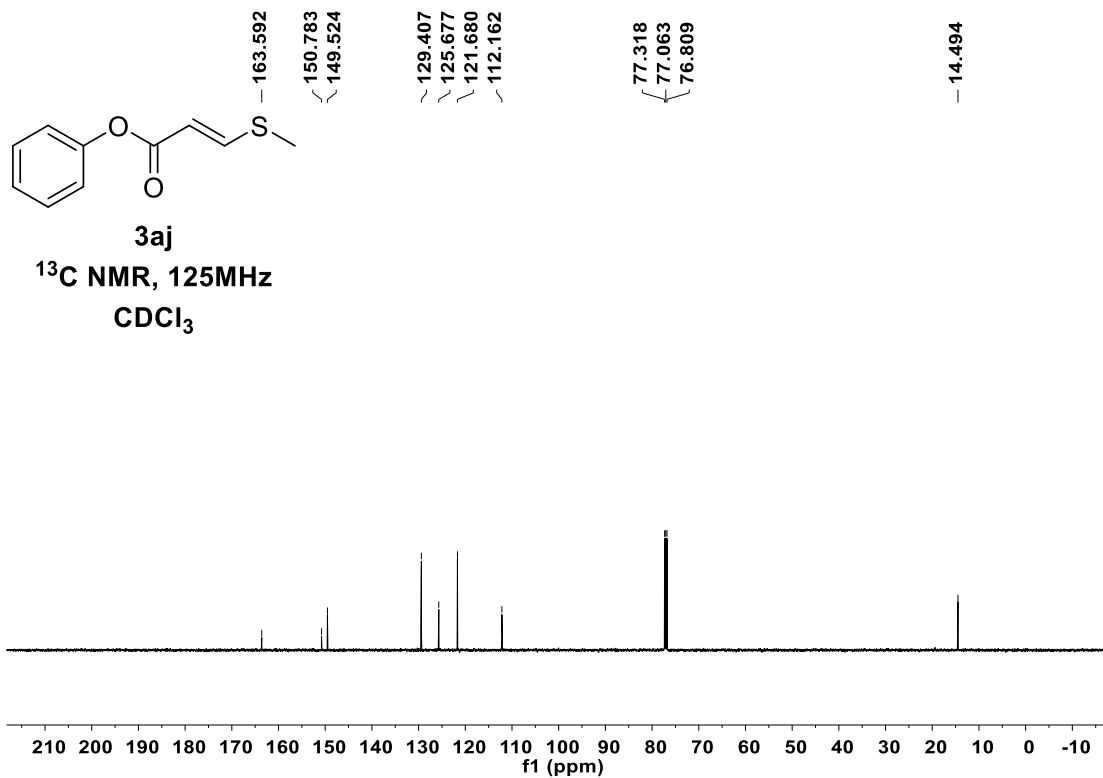



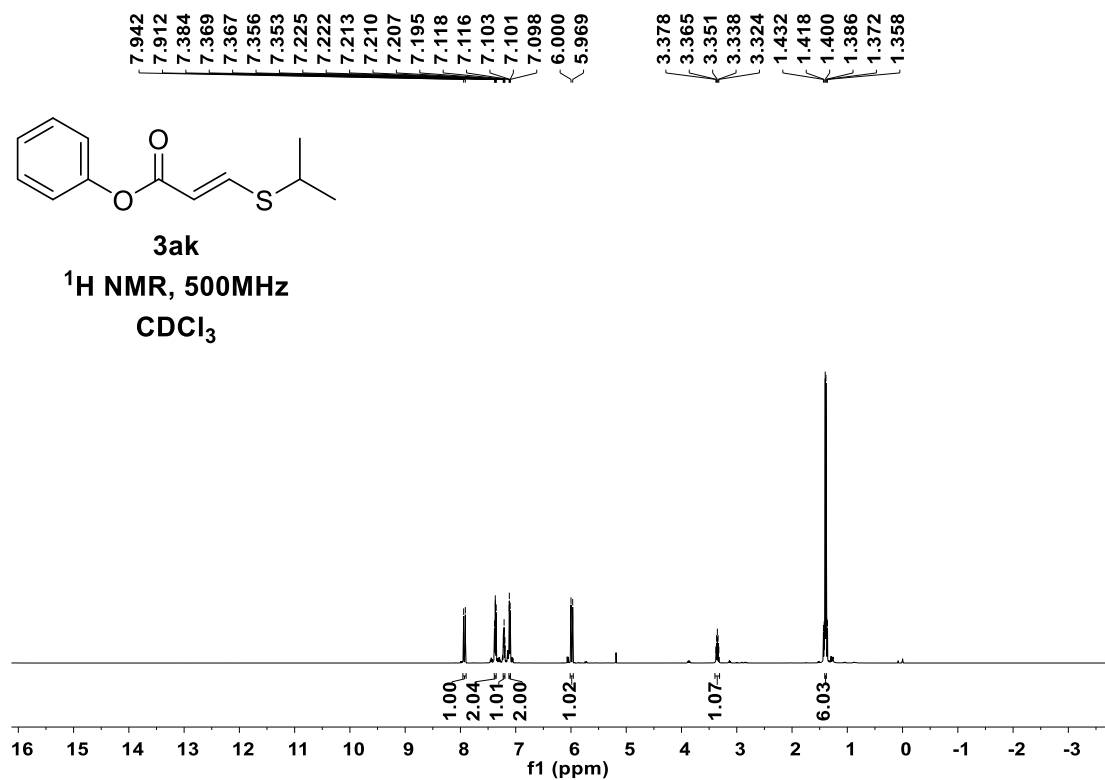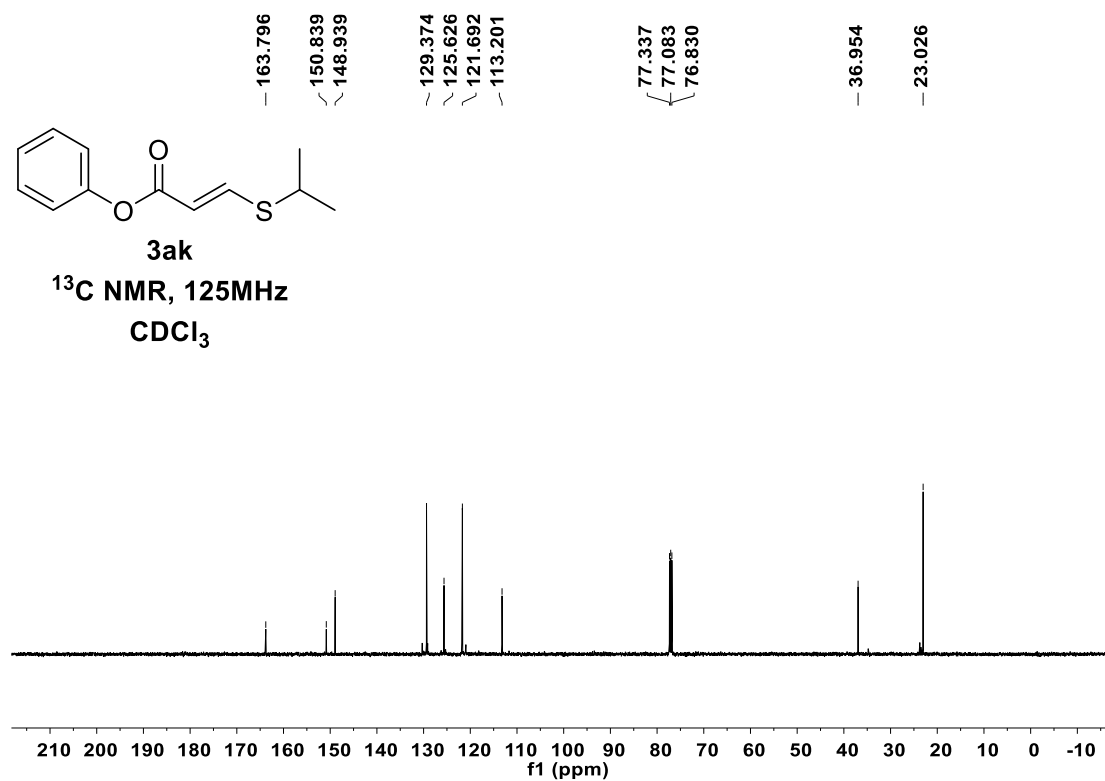

7.873  
7.842  
7.314  
7.310  
7.299  
7.286  
7.282  
7.155  
7.140  
7.125  
7.046  
7.042  
7.039  
7.028  
7.024  
5.932  
5.901  
3.060  
2.009  
2.001  
1.992  
1.982  
1.974  
1.746  
1.738  
1.730  
1.720  
1.712  
1.704  
1.558  
1.425  
1.419  
1.403  
1.398  
1.393  
1.378  
1.372  
1.351  
1.336  
1.329  
1.323  
1.309  
1.303  
1.296  
1.281  
1.234  
1.231

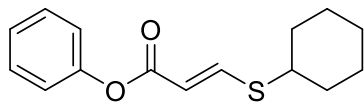

3al

<sup>1</sup>H NMR, 500MHz

CDCl<sub>3</sub>

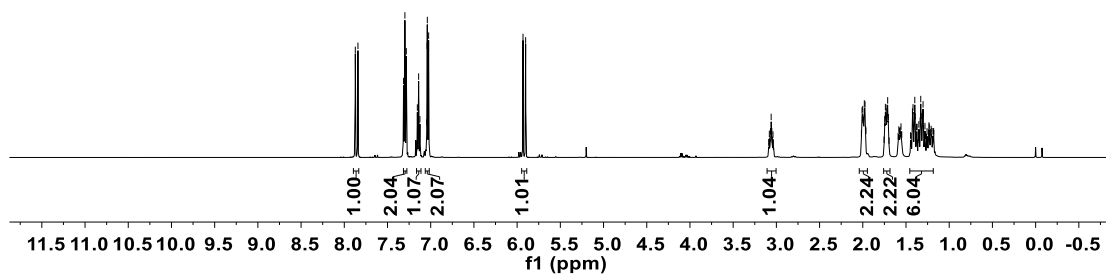

163.868

150.823

149.105

129.392

125.635

121.716

112.921

77.364

77.109

76.855

45.264

33.078

25.804

25.467

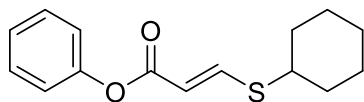

3al

<sup>13</sup>C NMR, 125MHz

CDCl<sub>3</sub>

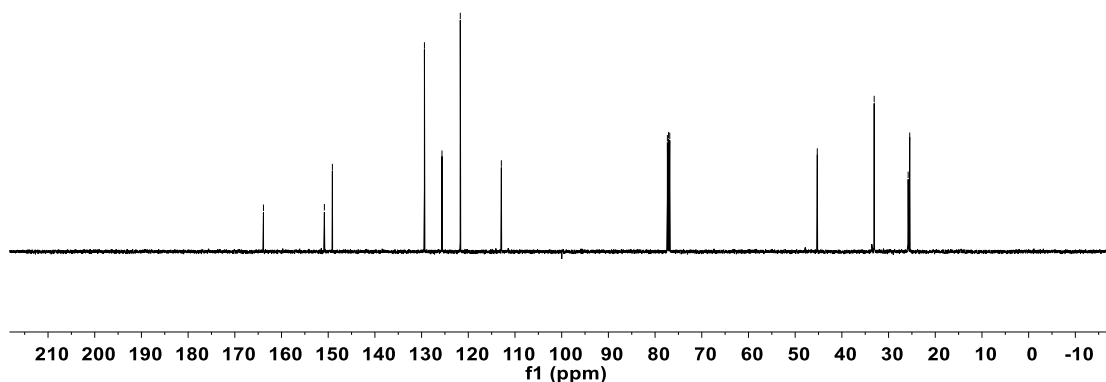

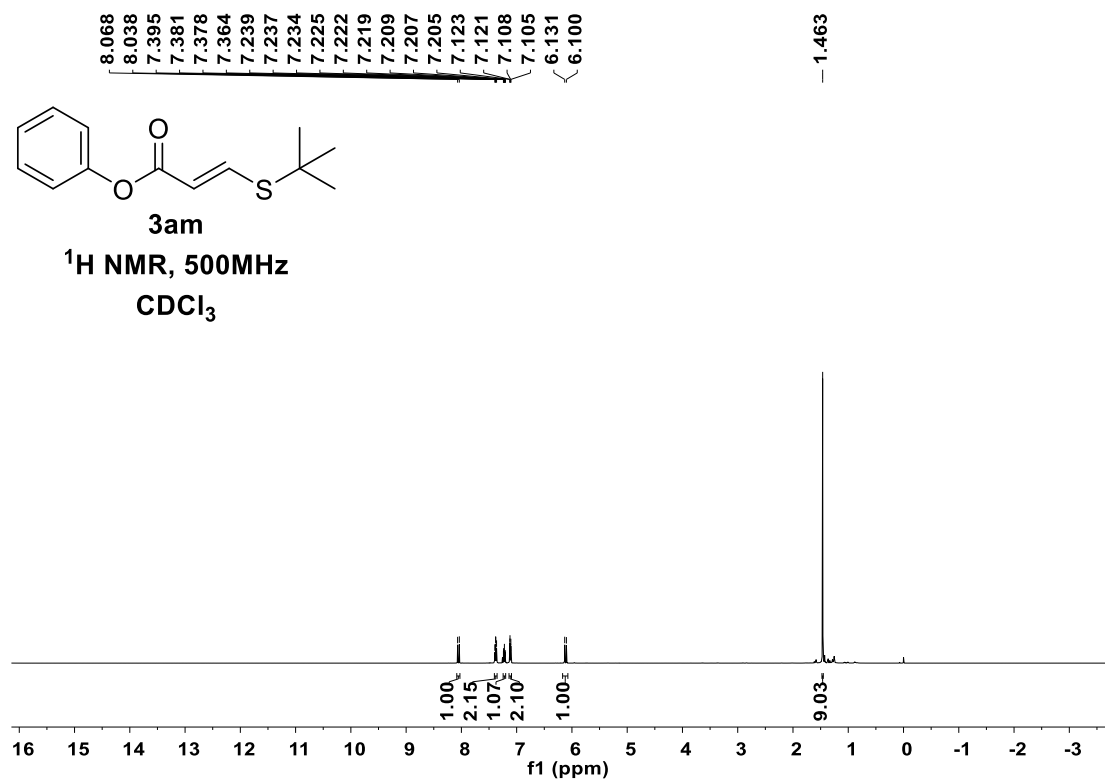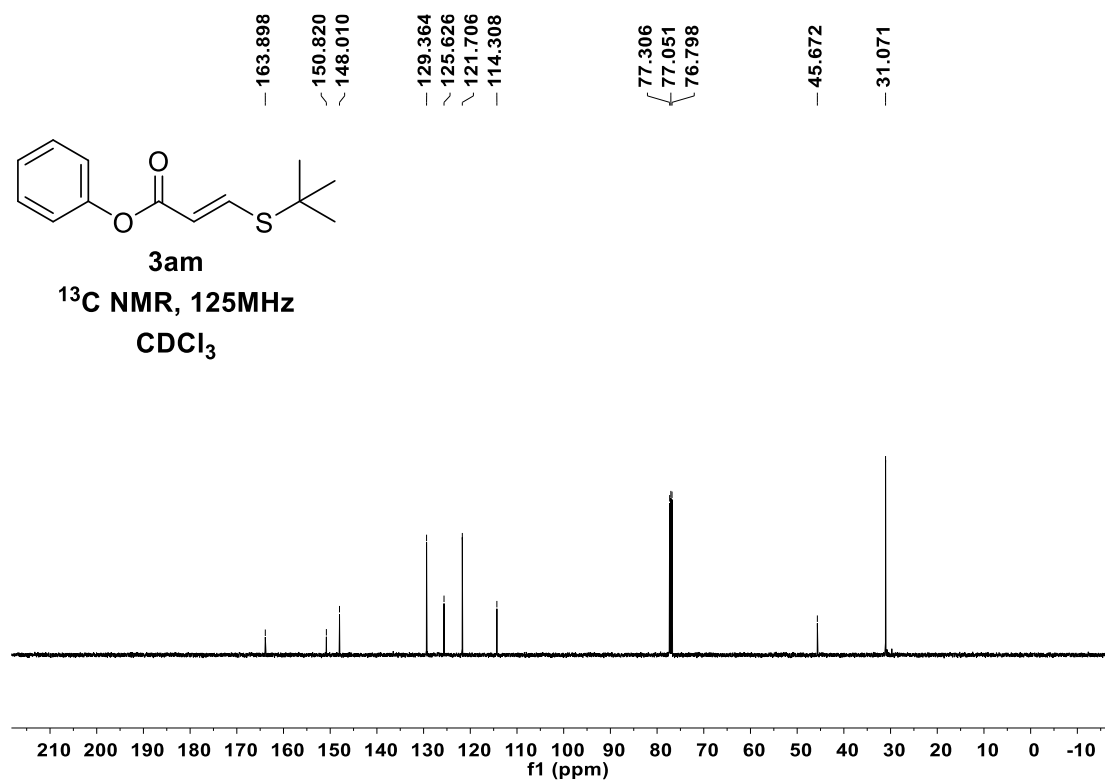

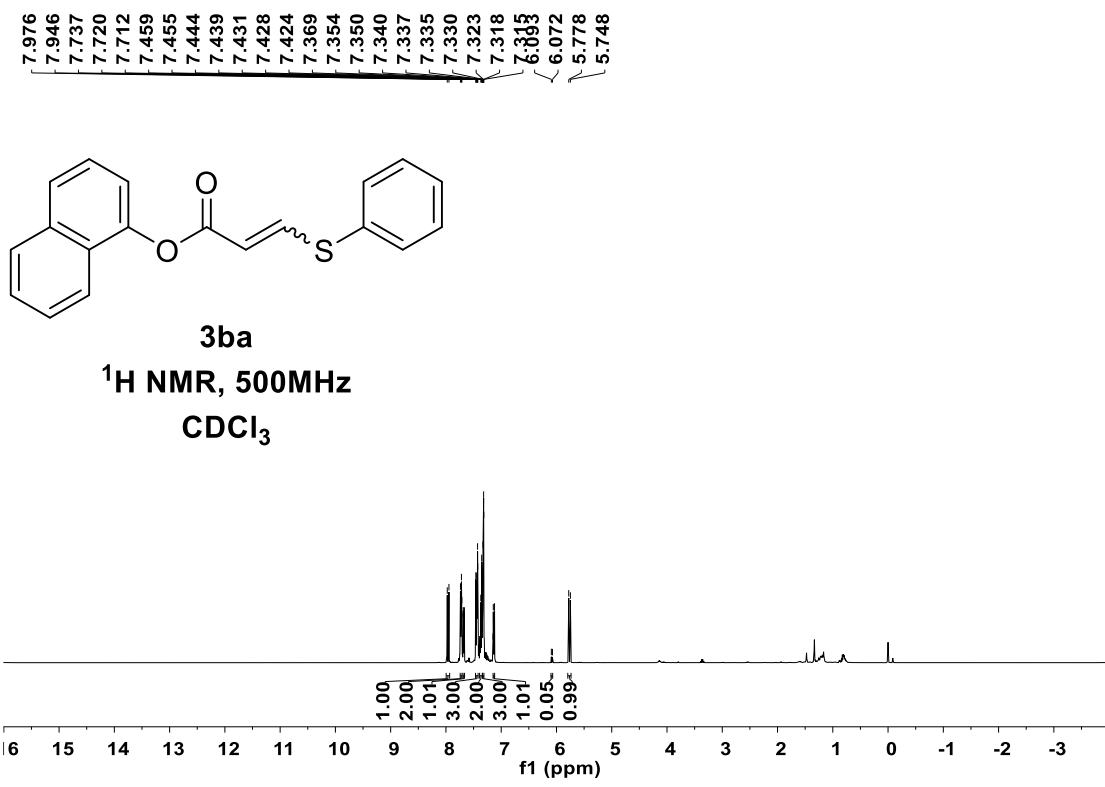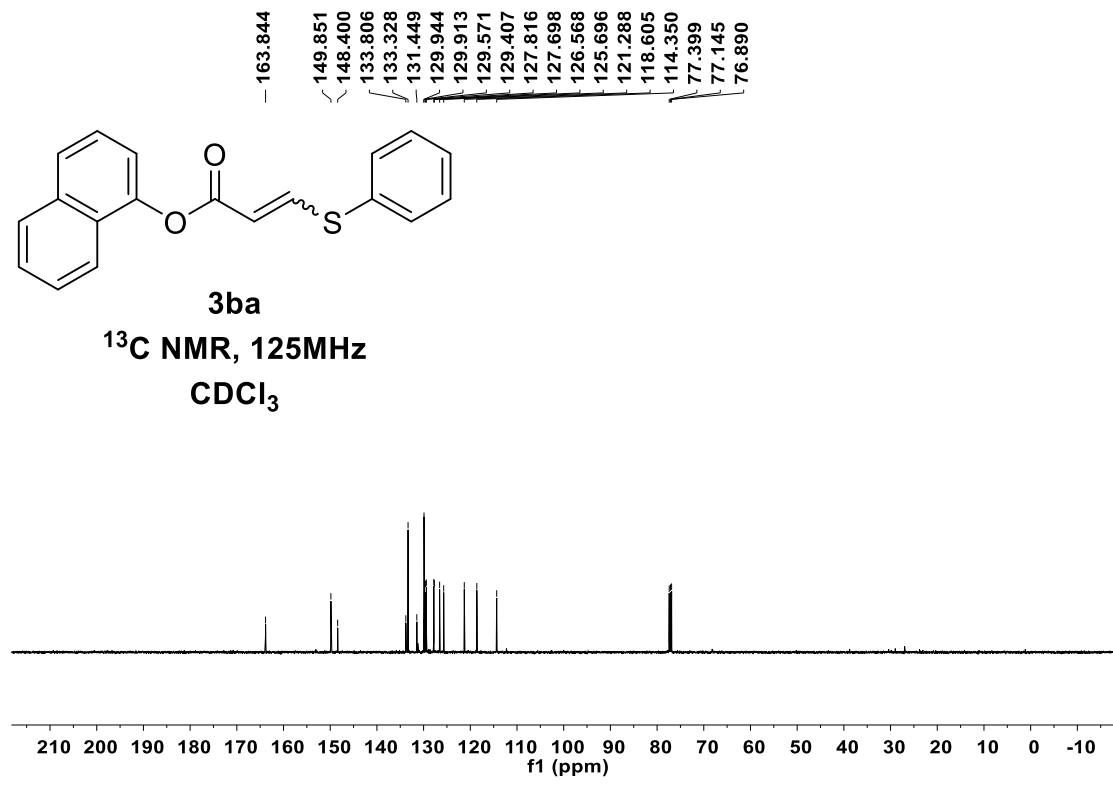

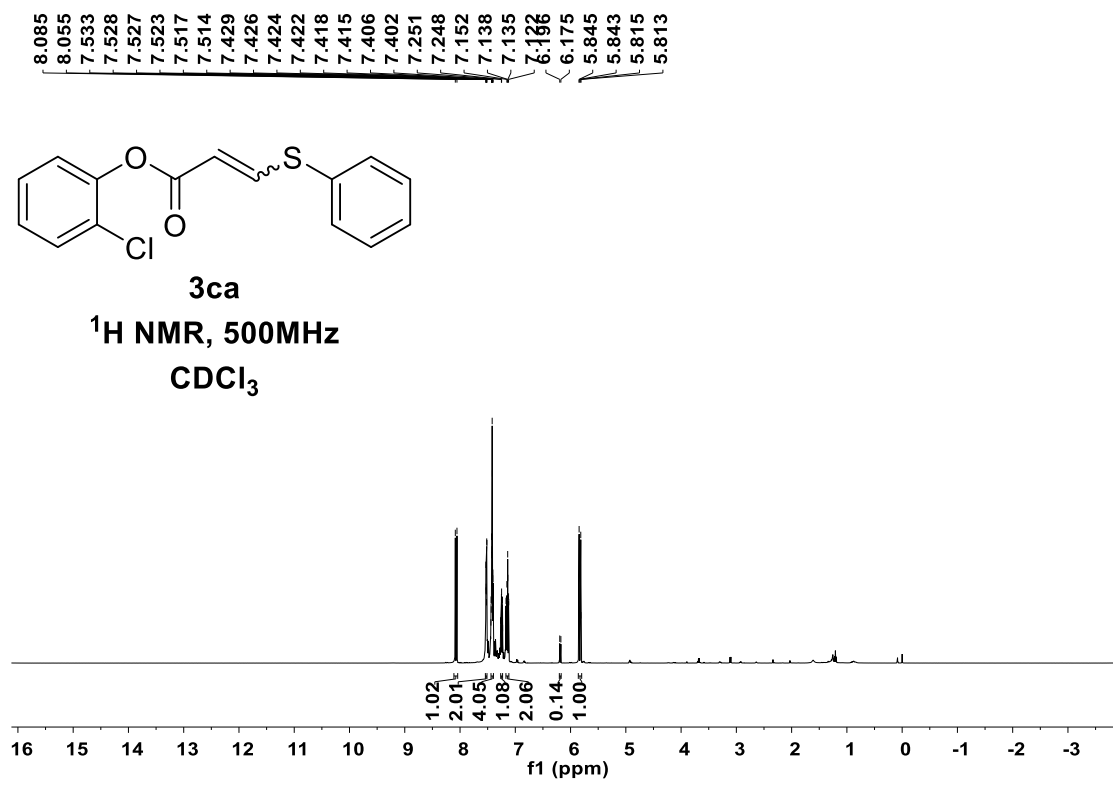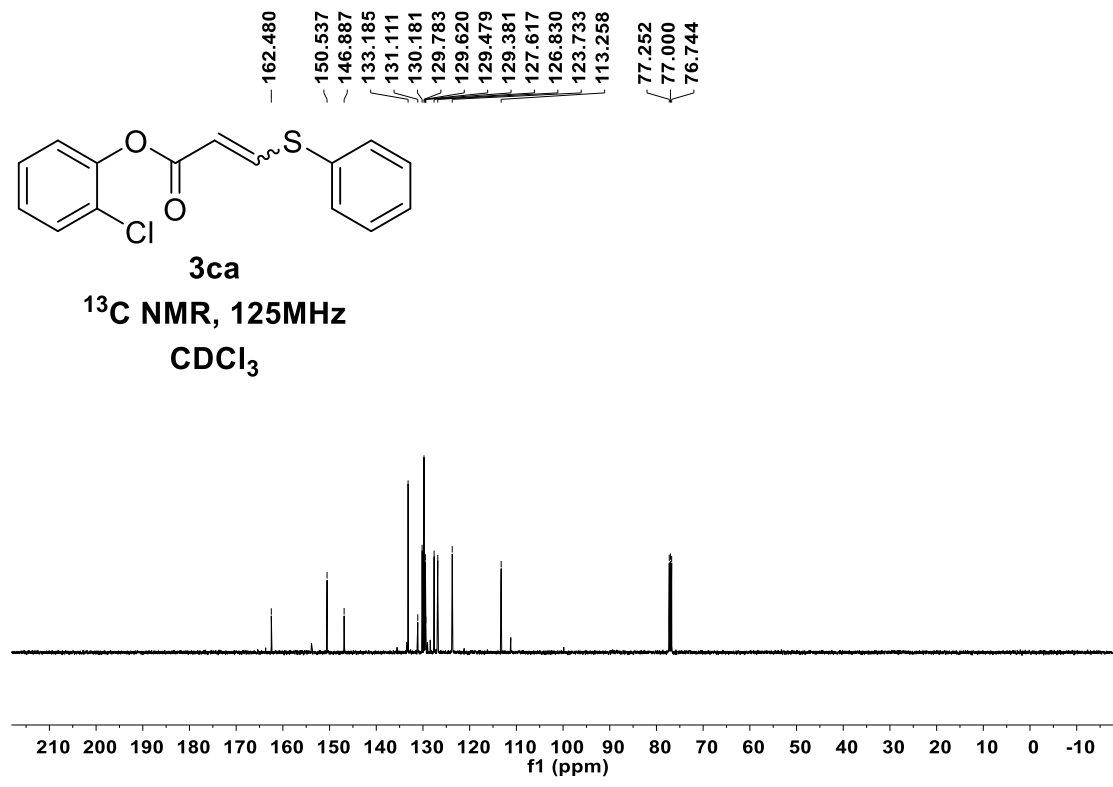

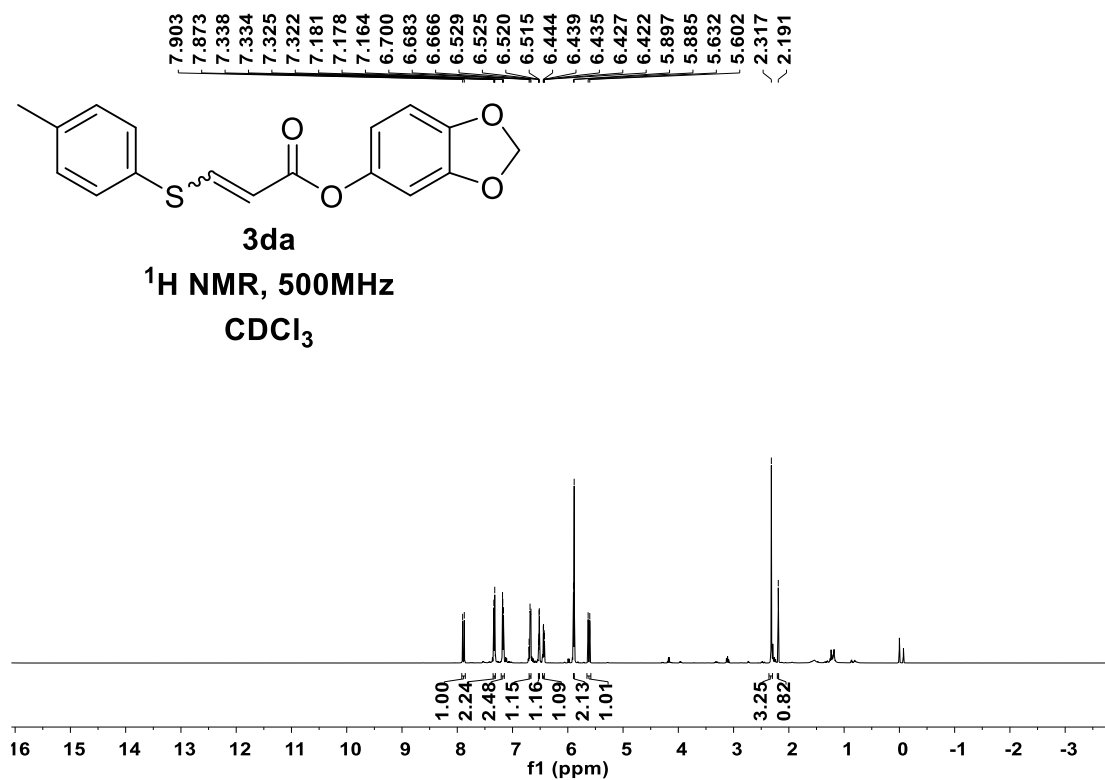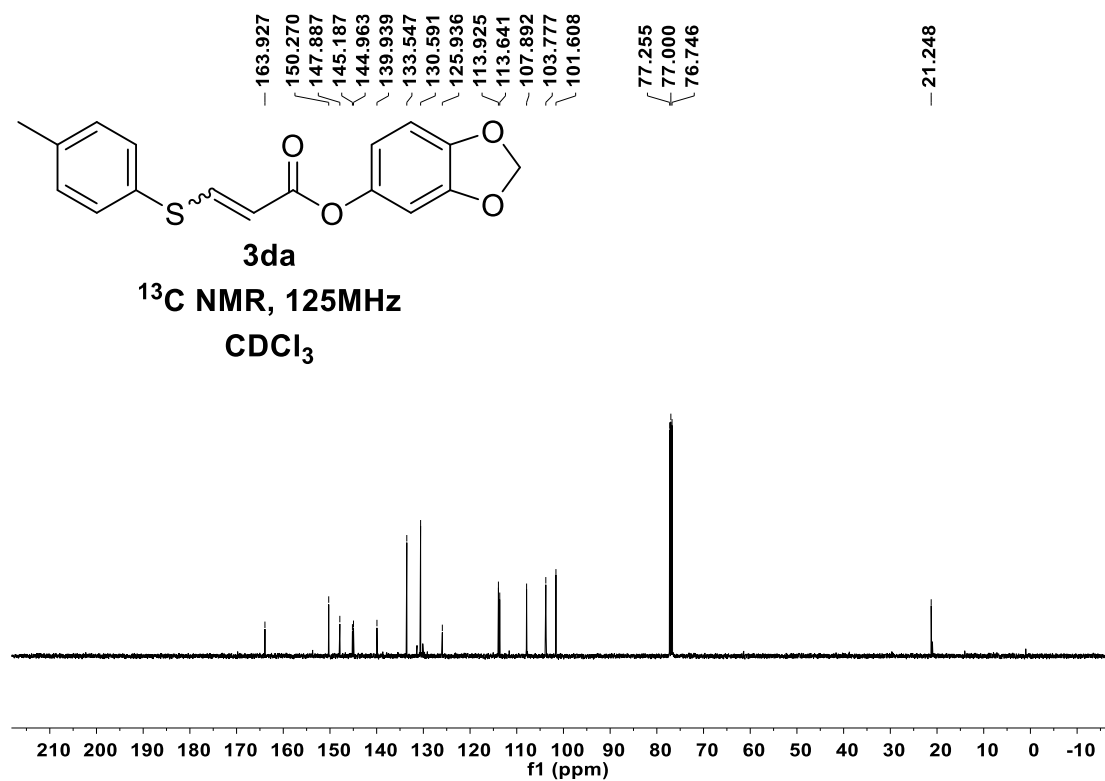

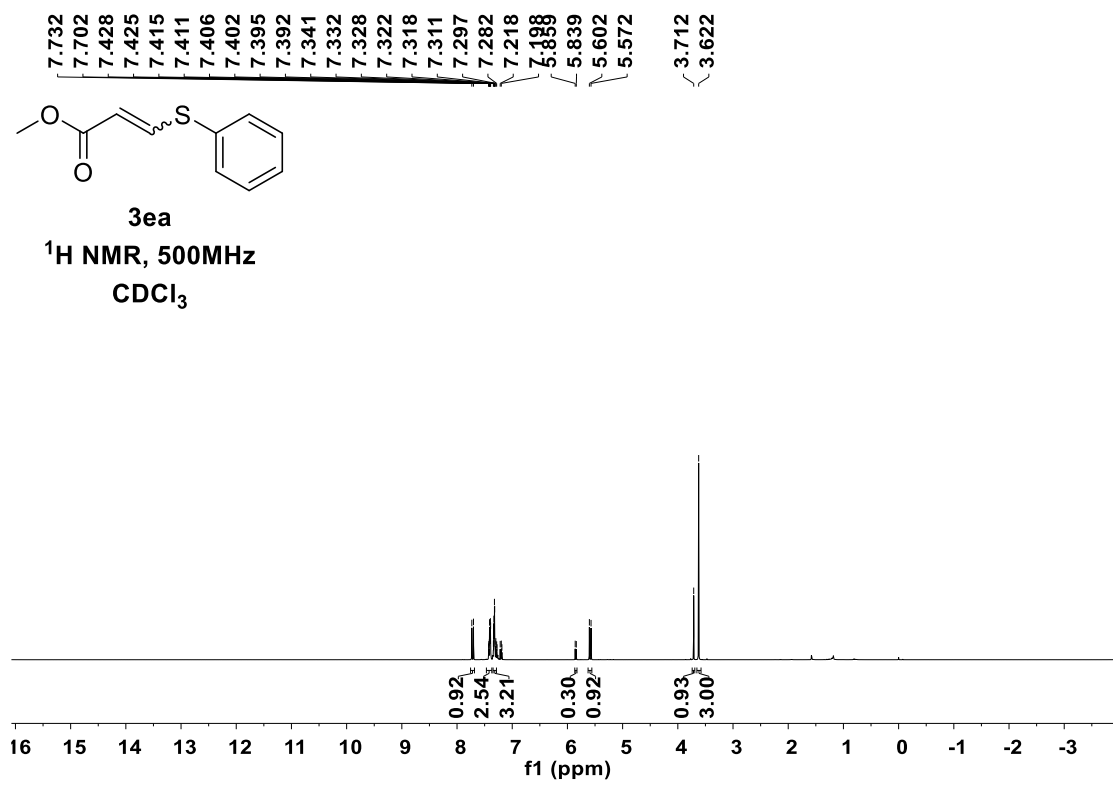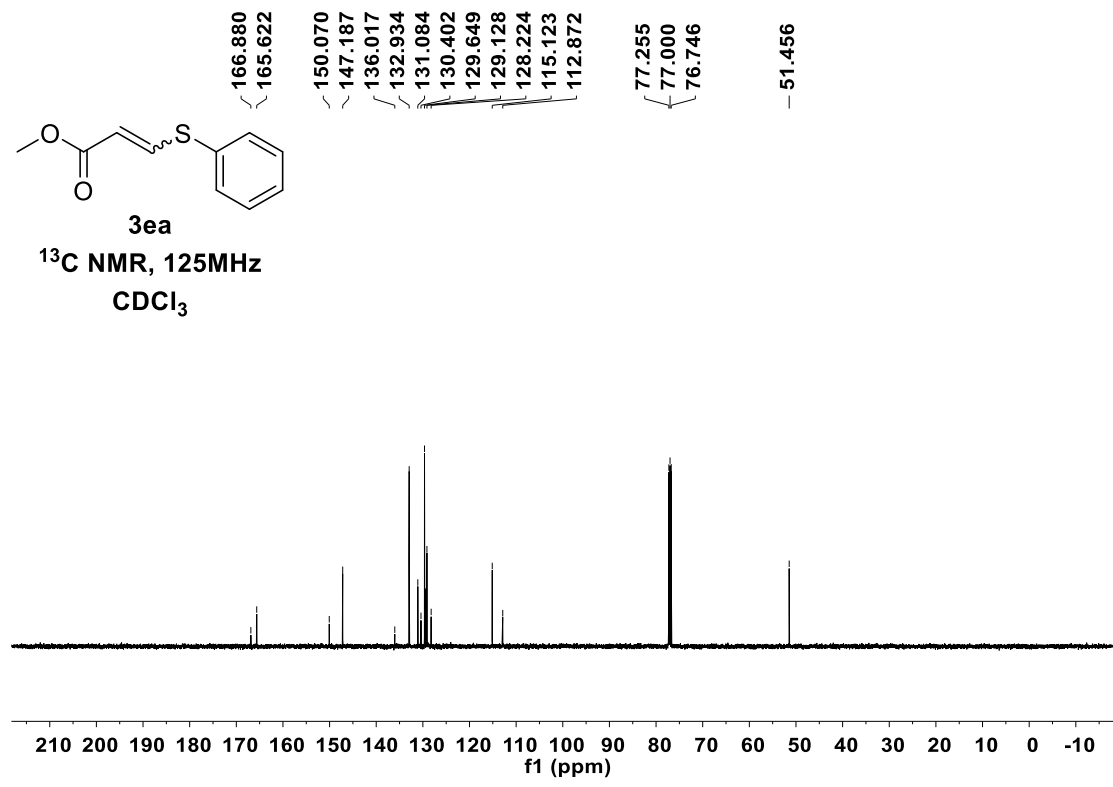

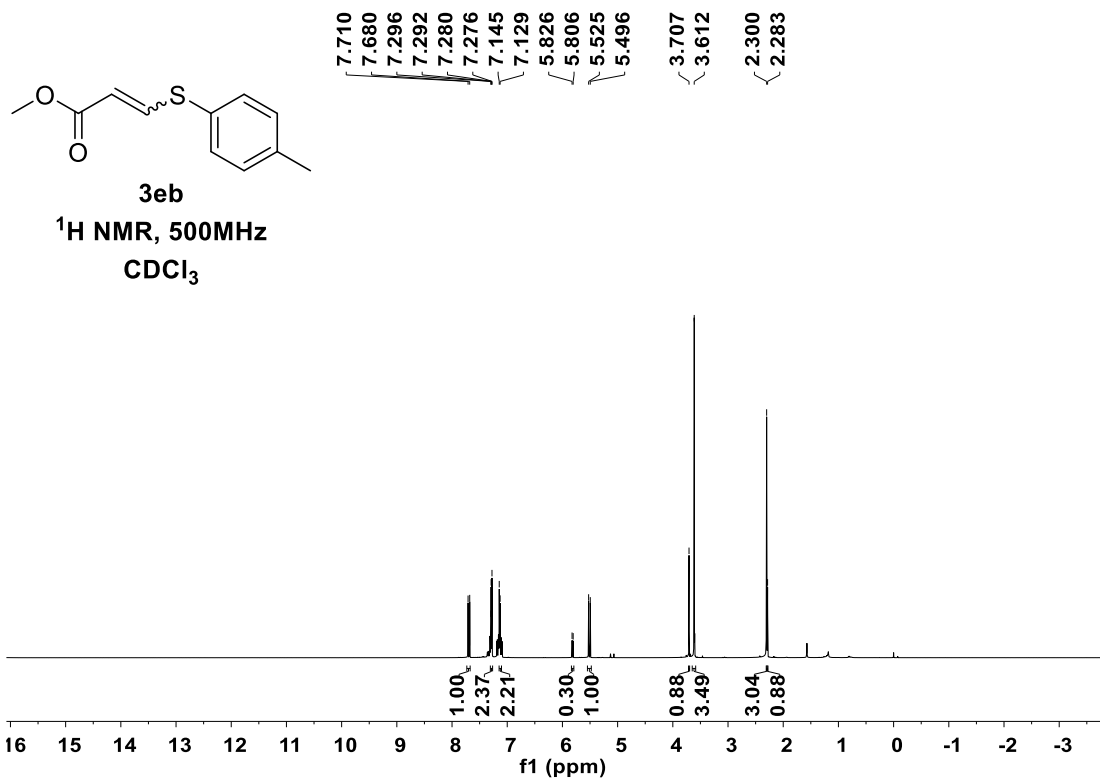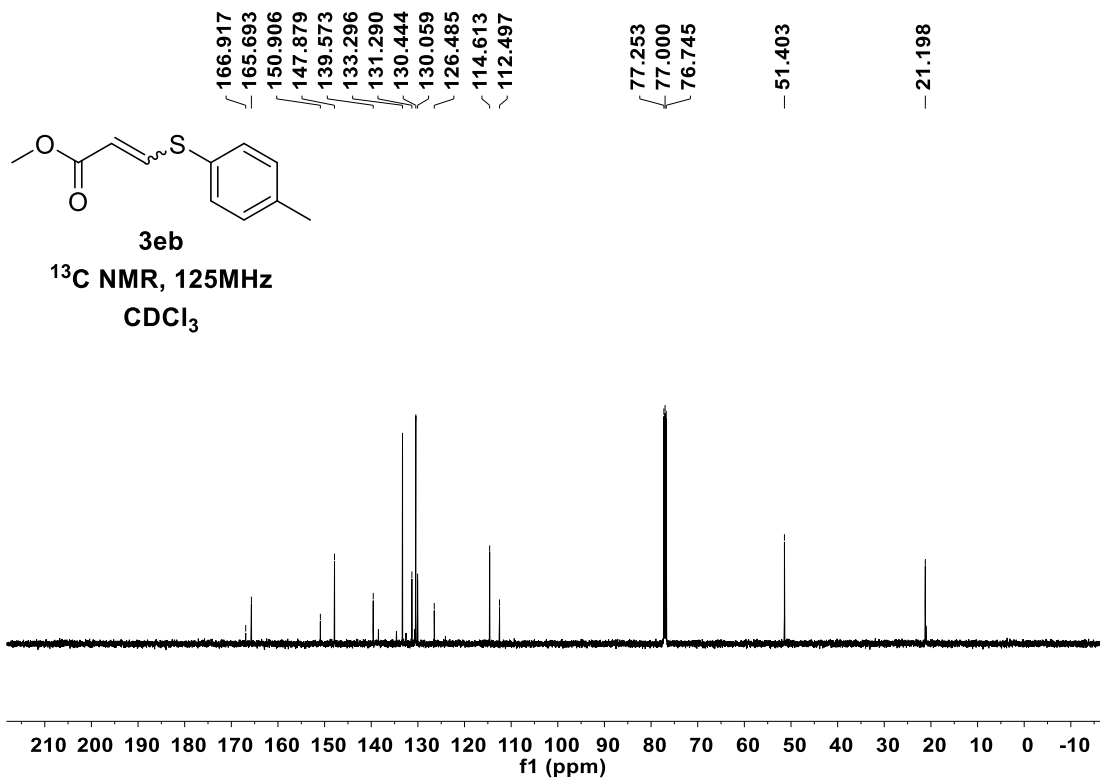



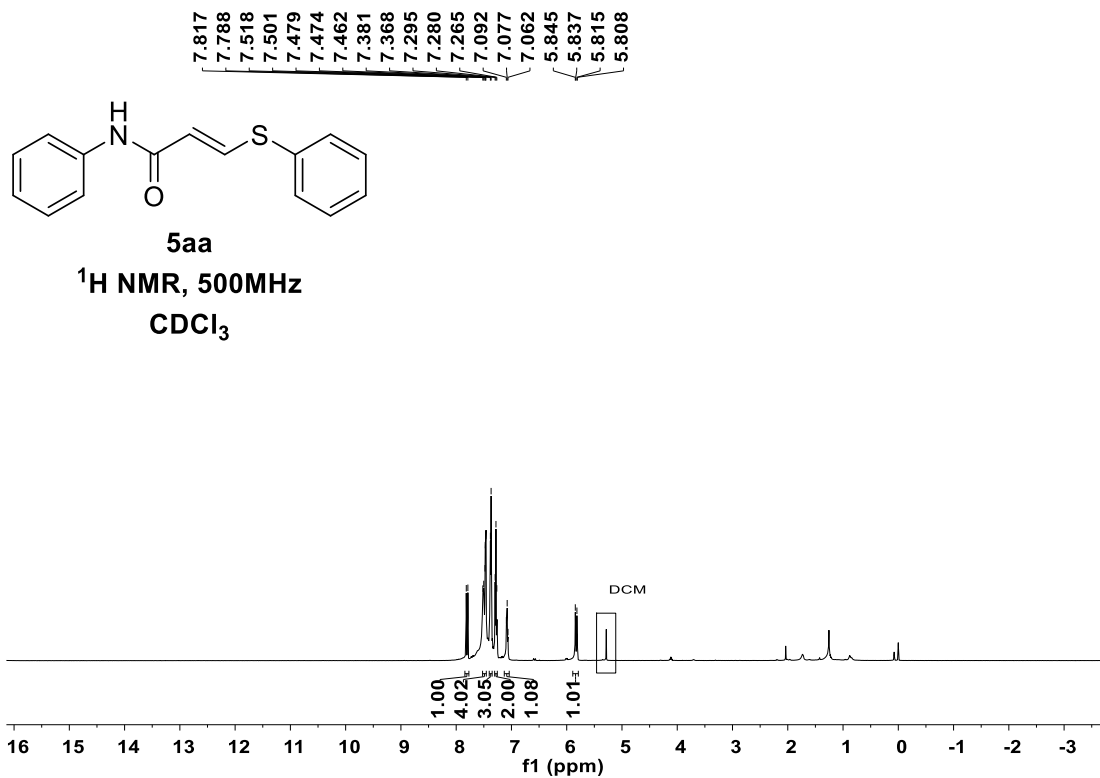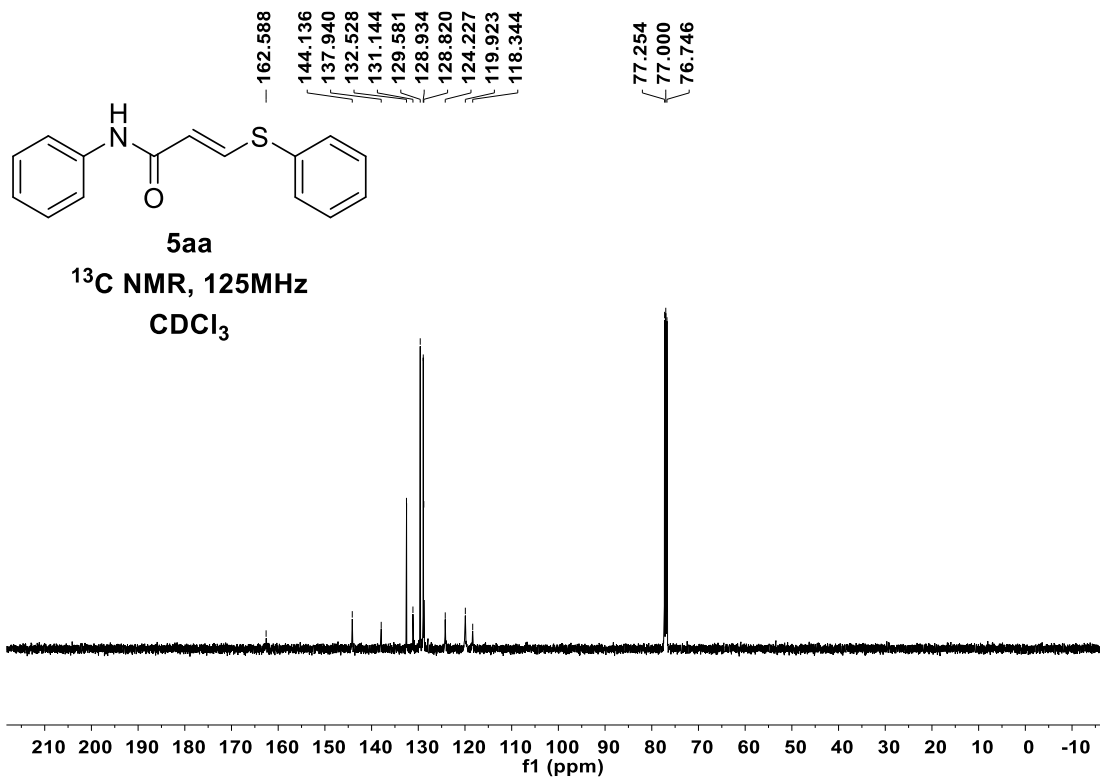

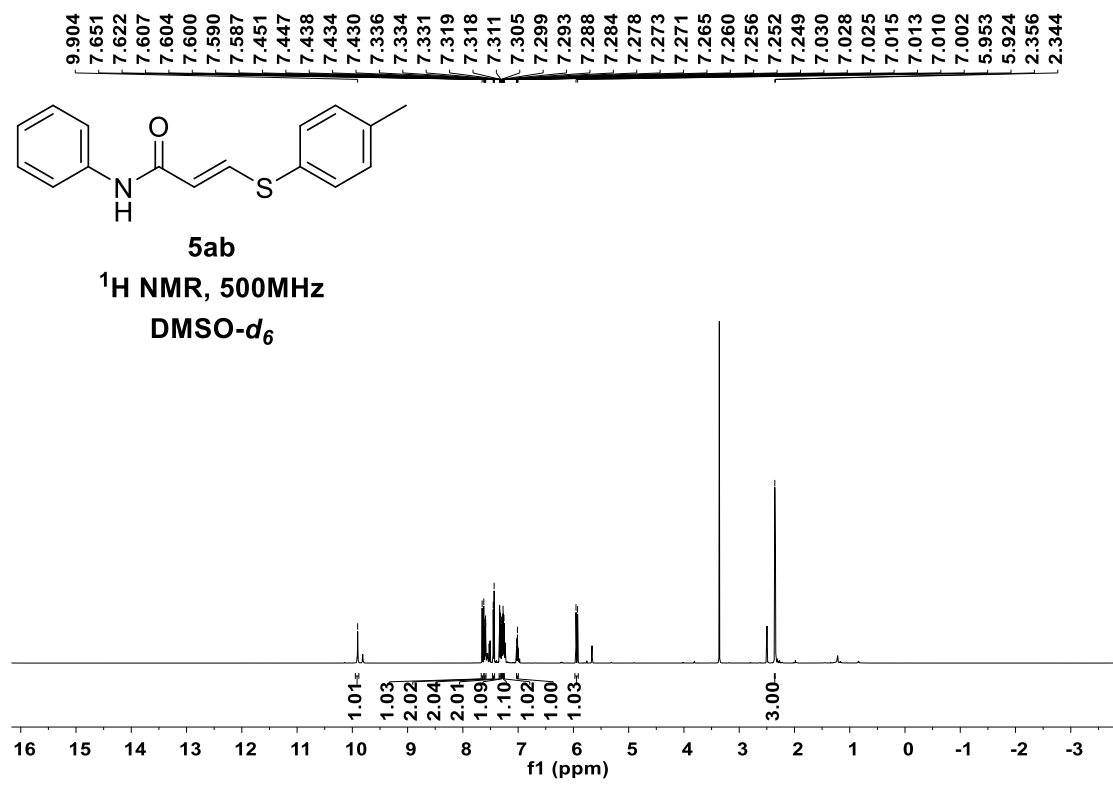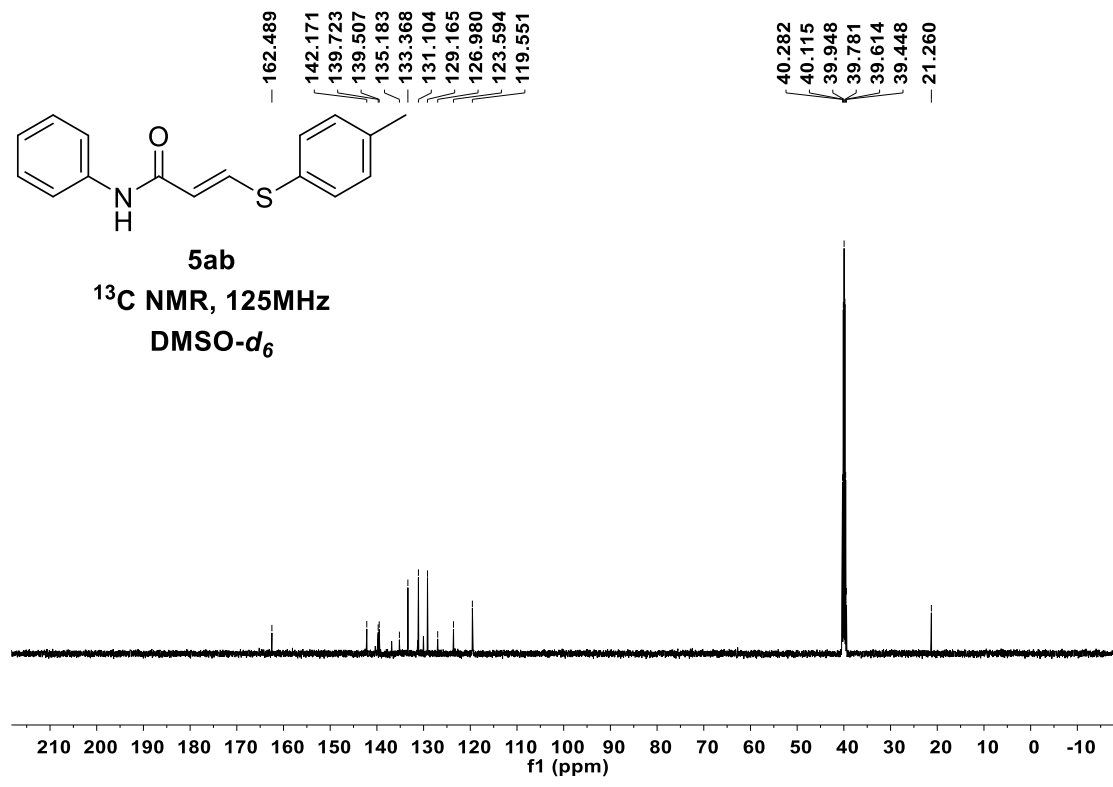

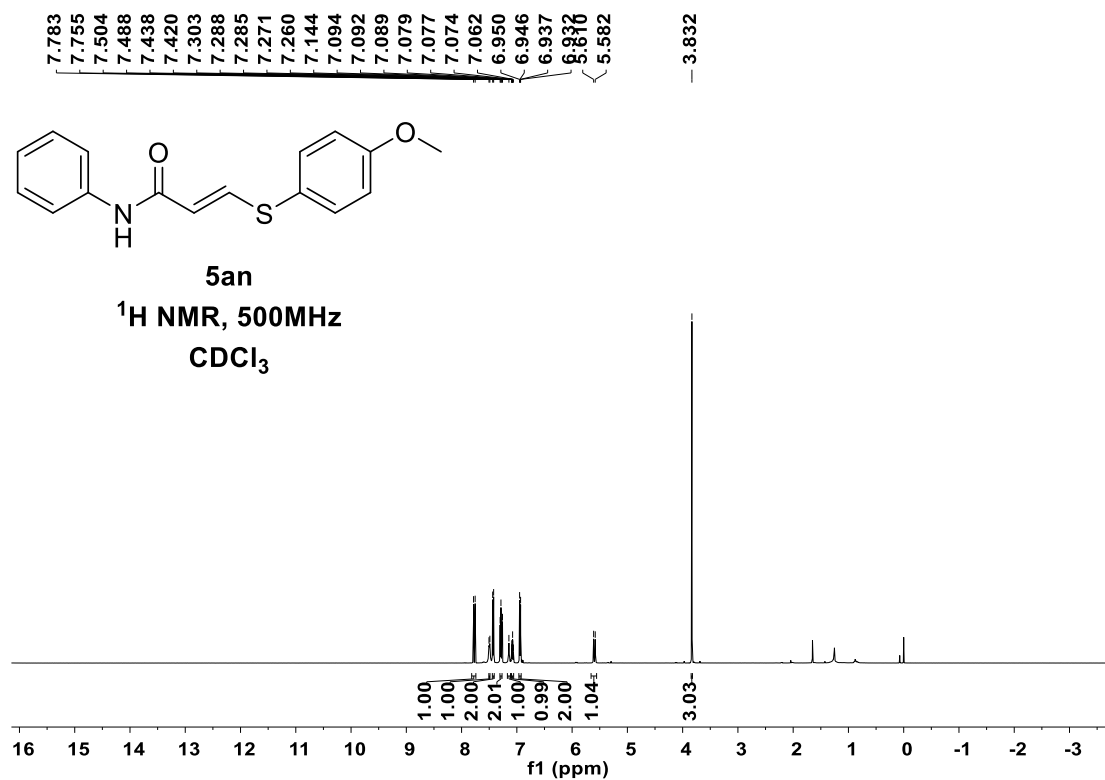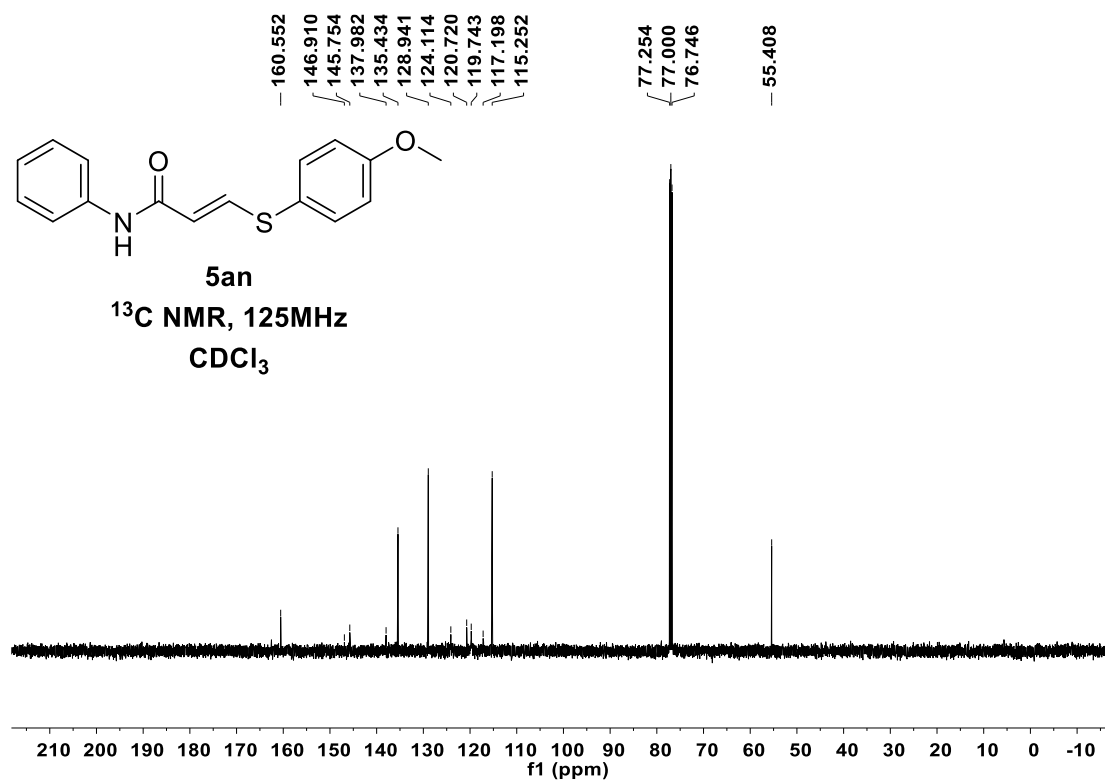

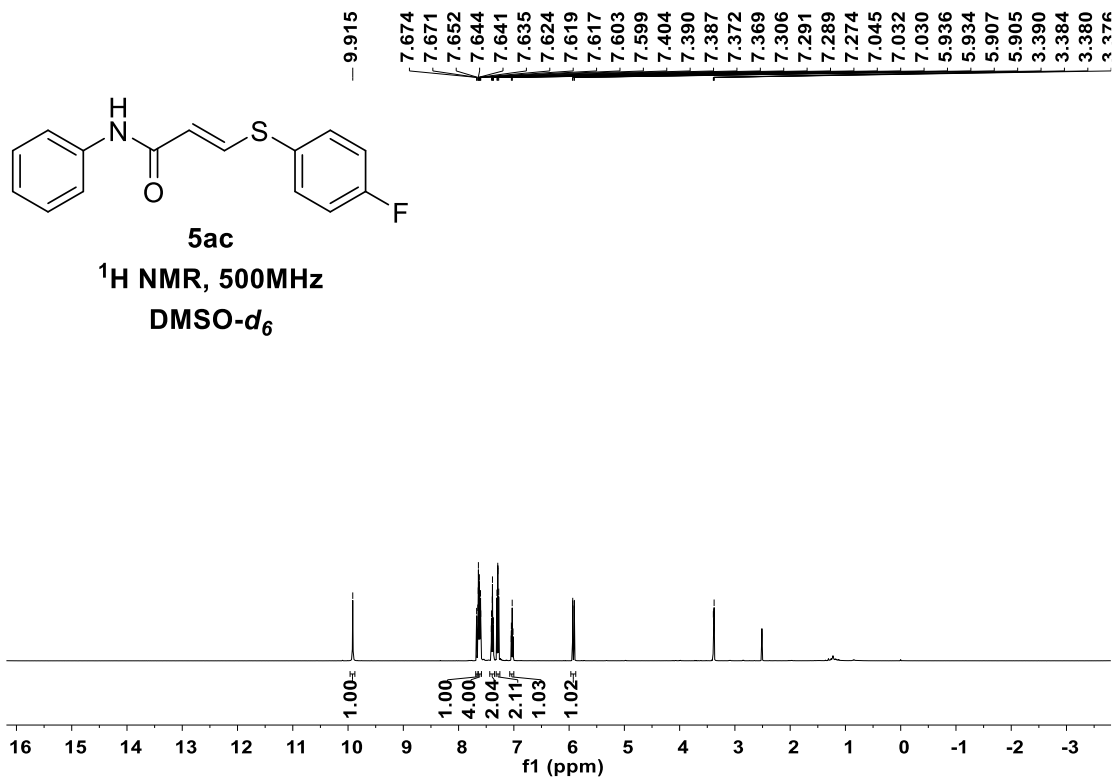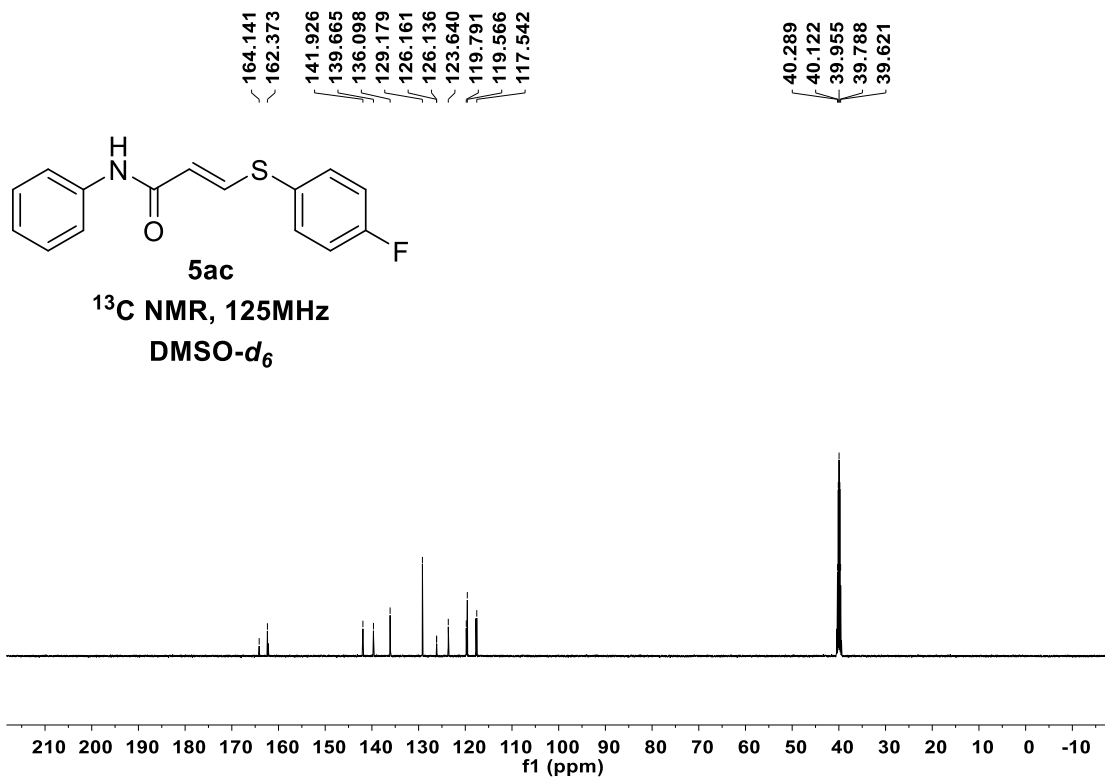

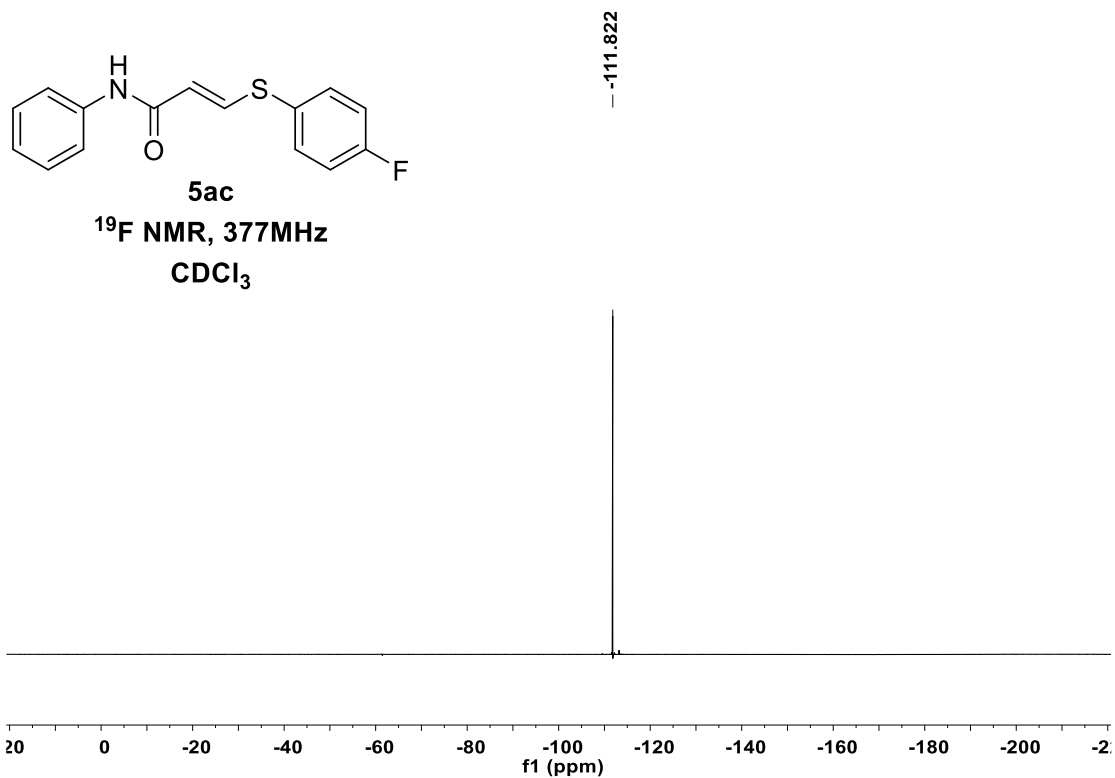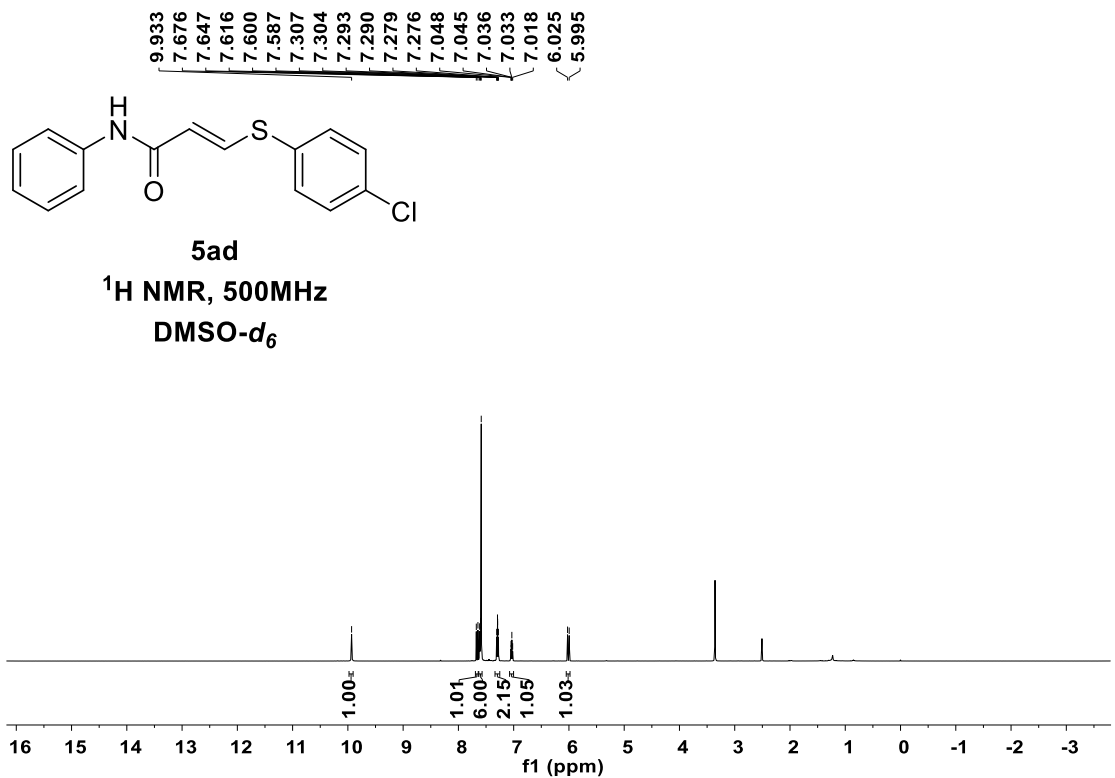

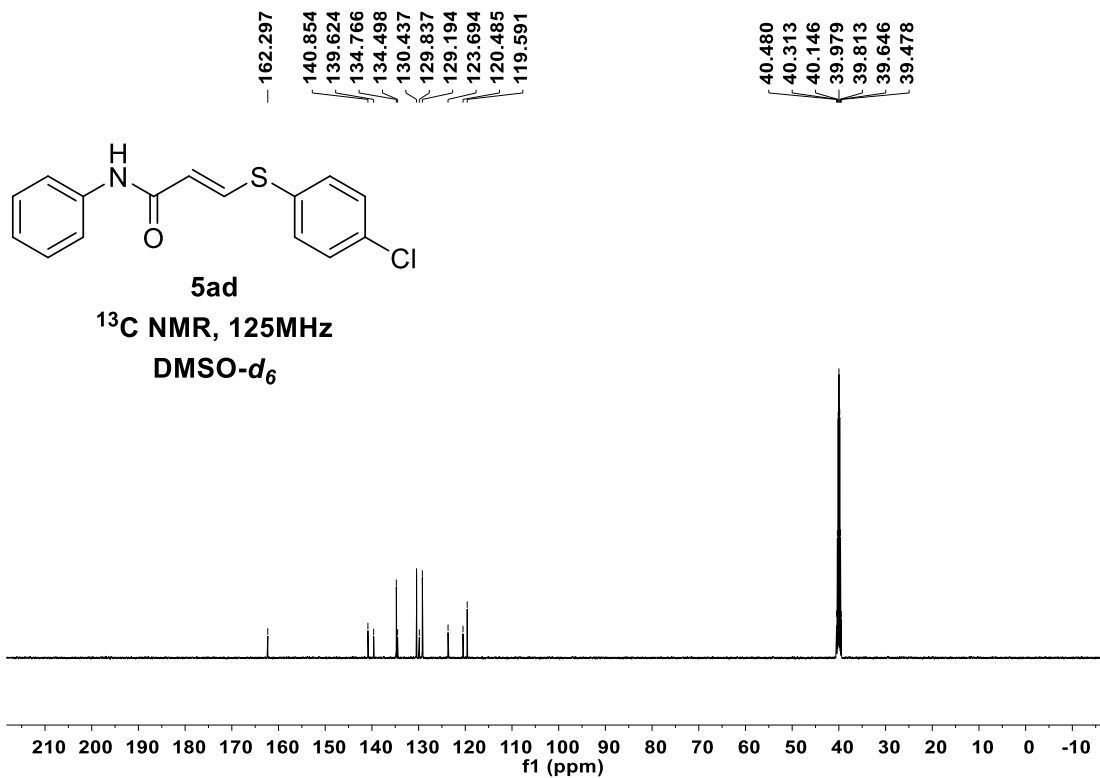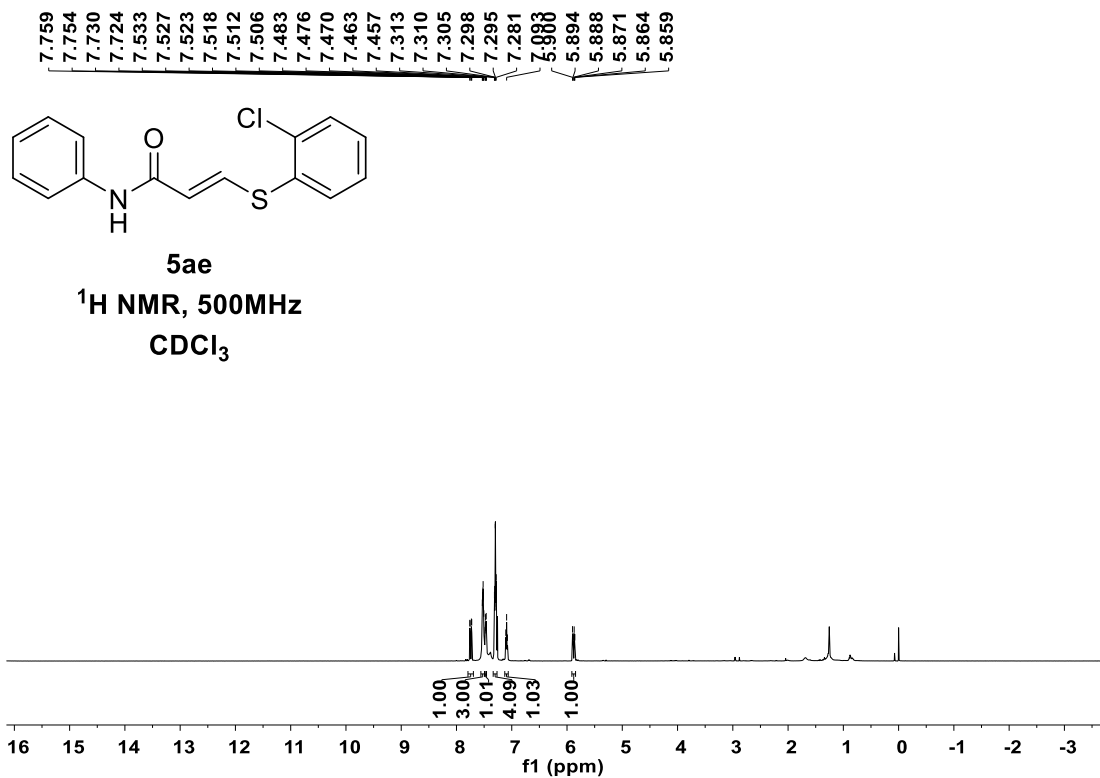

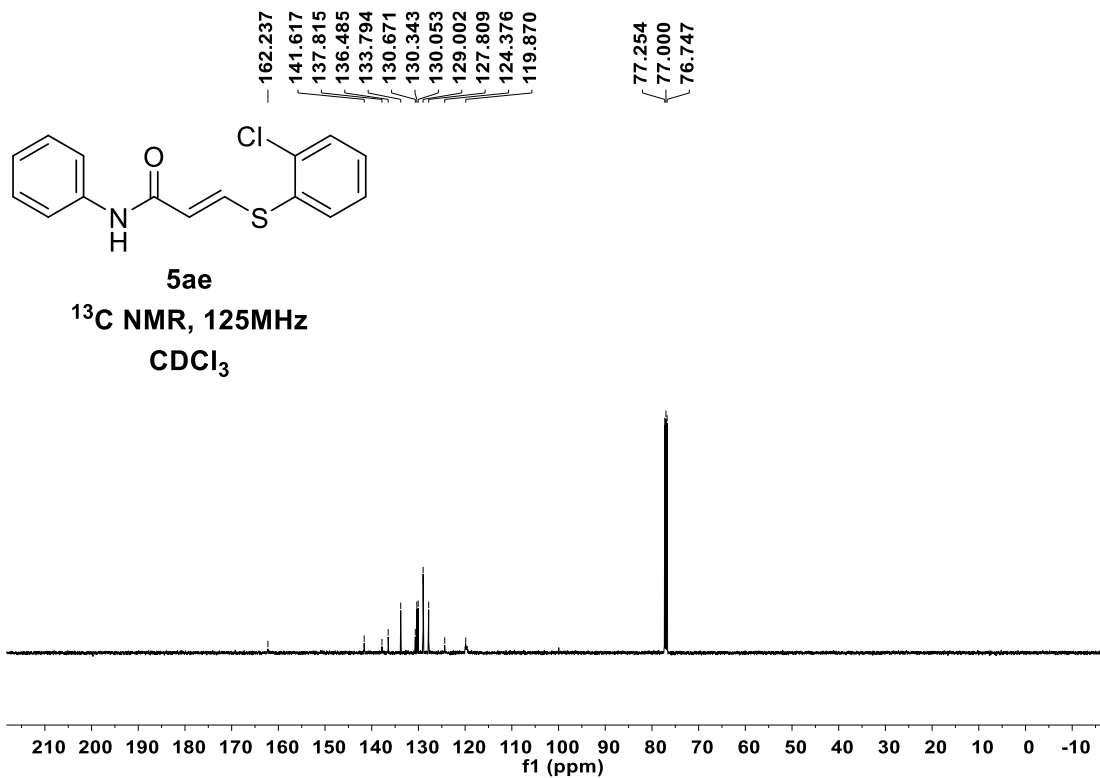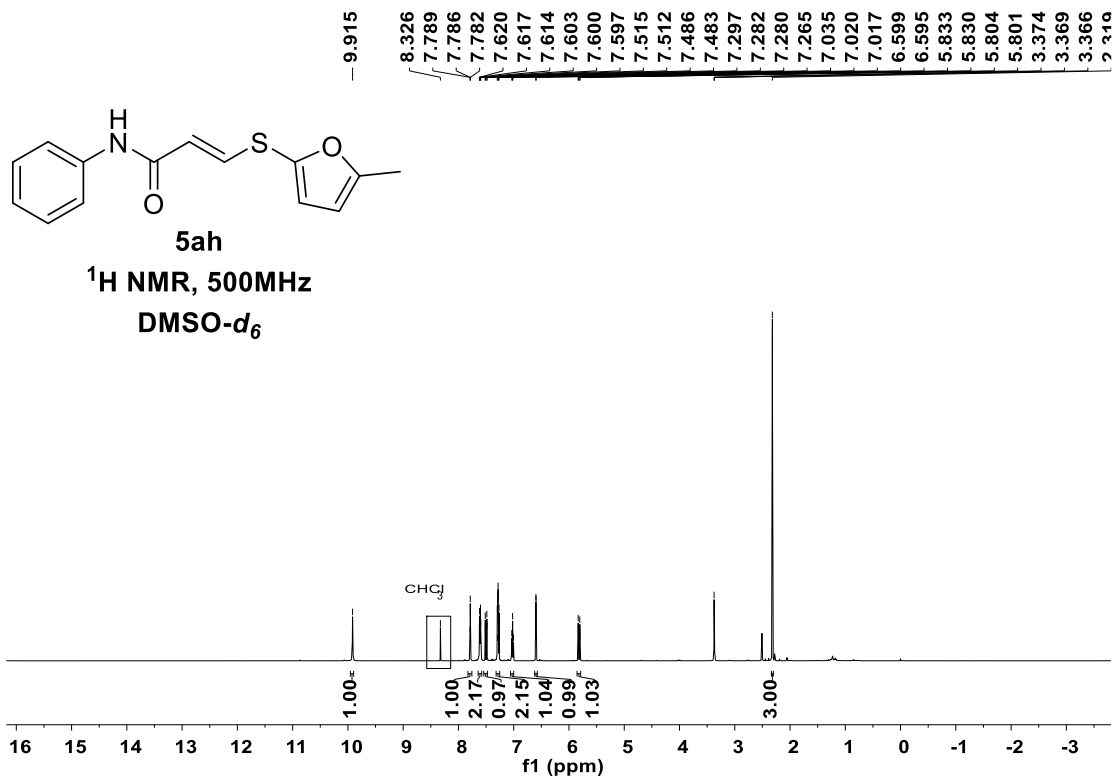

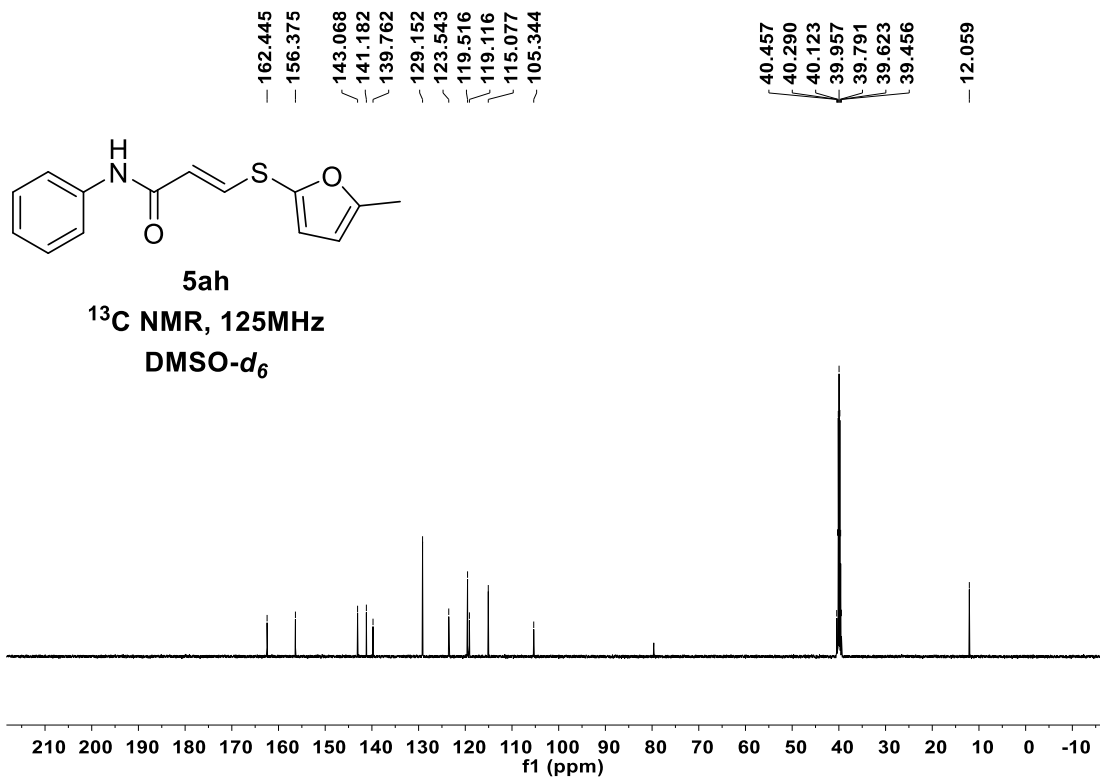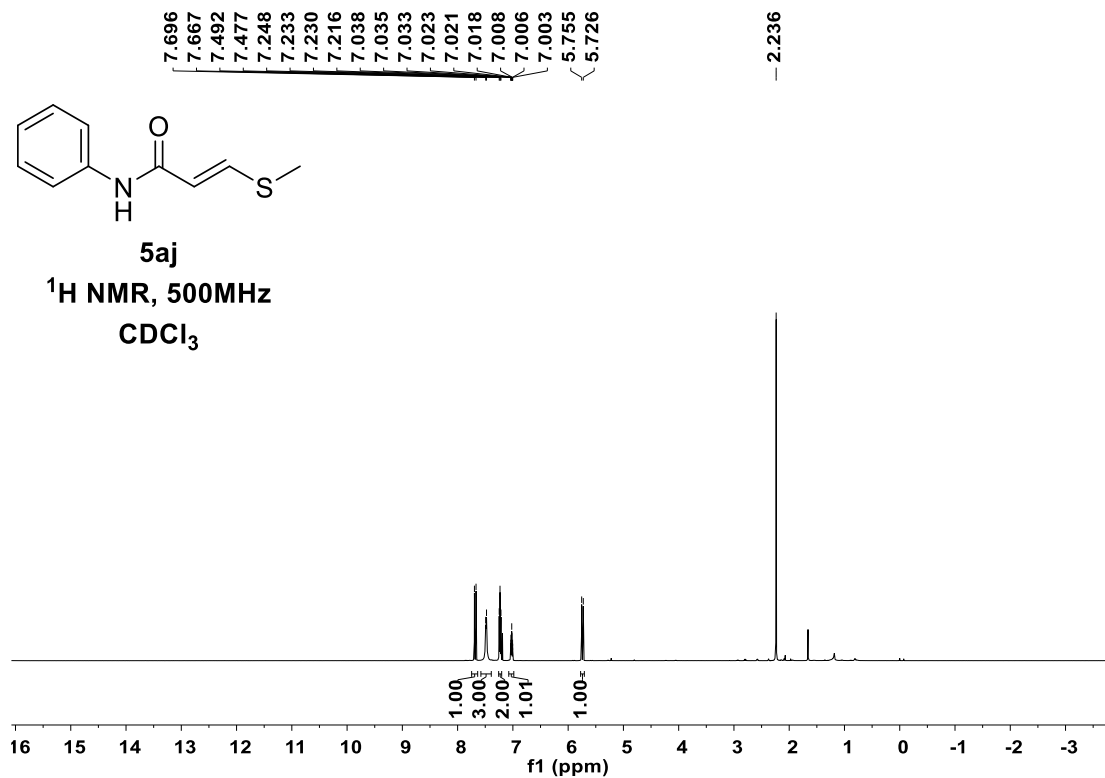



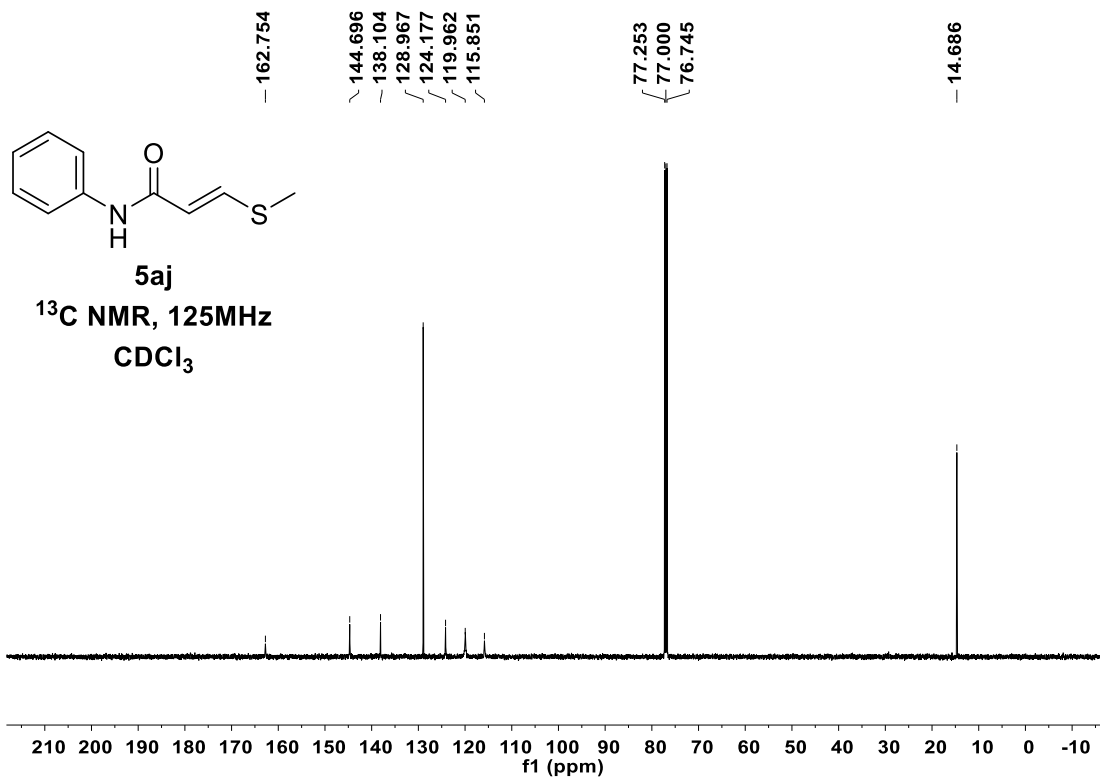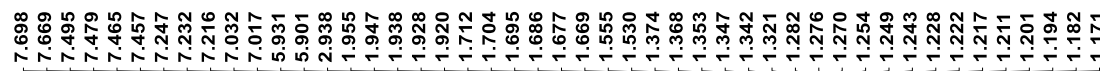

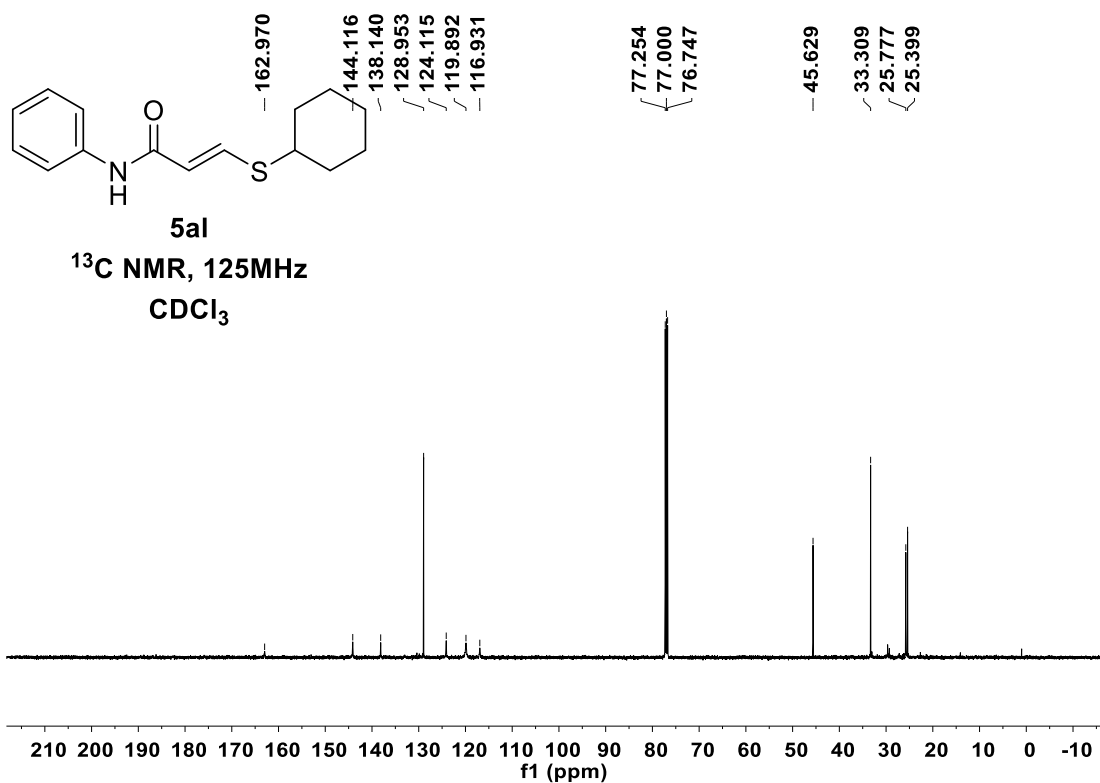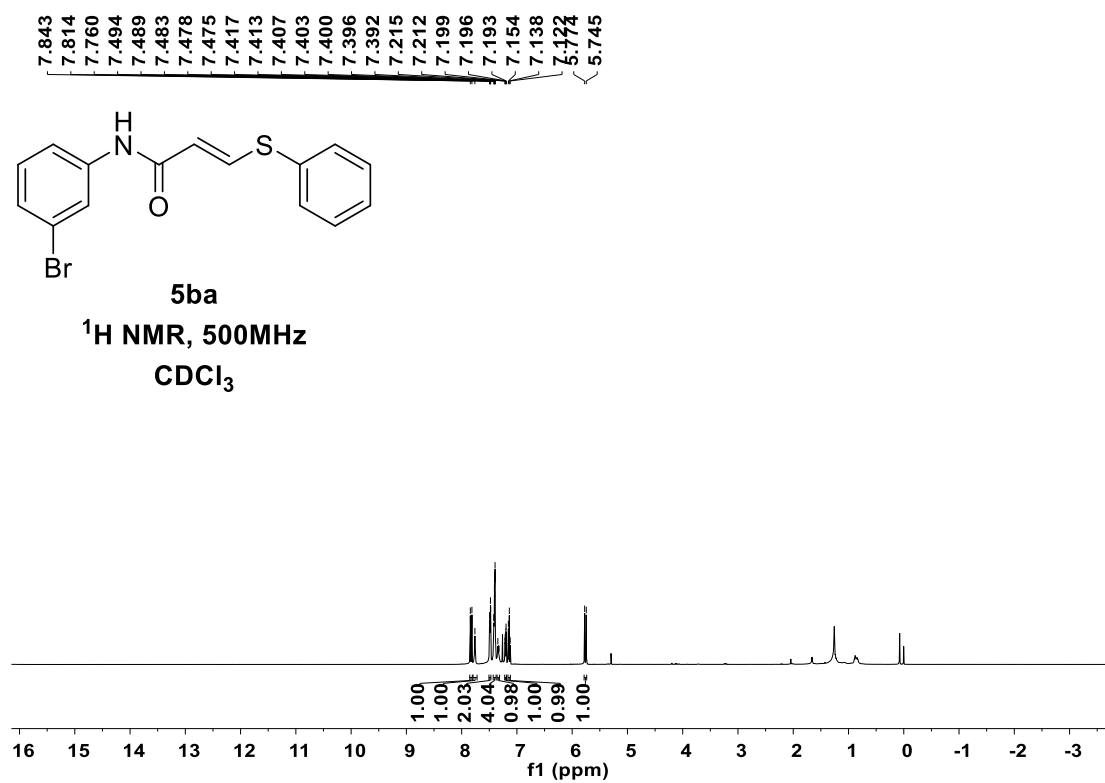

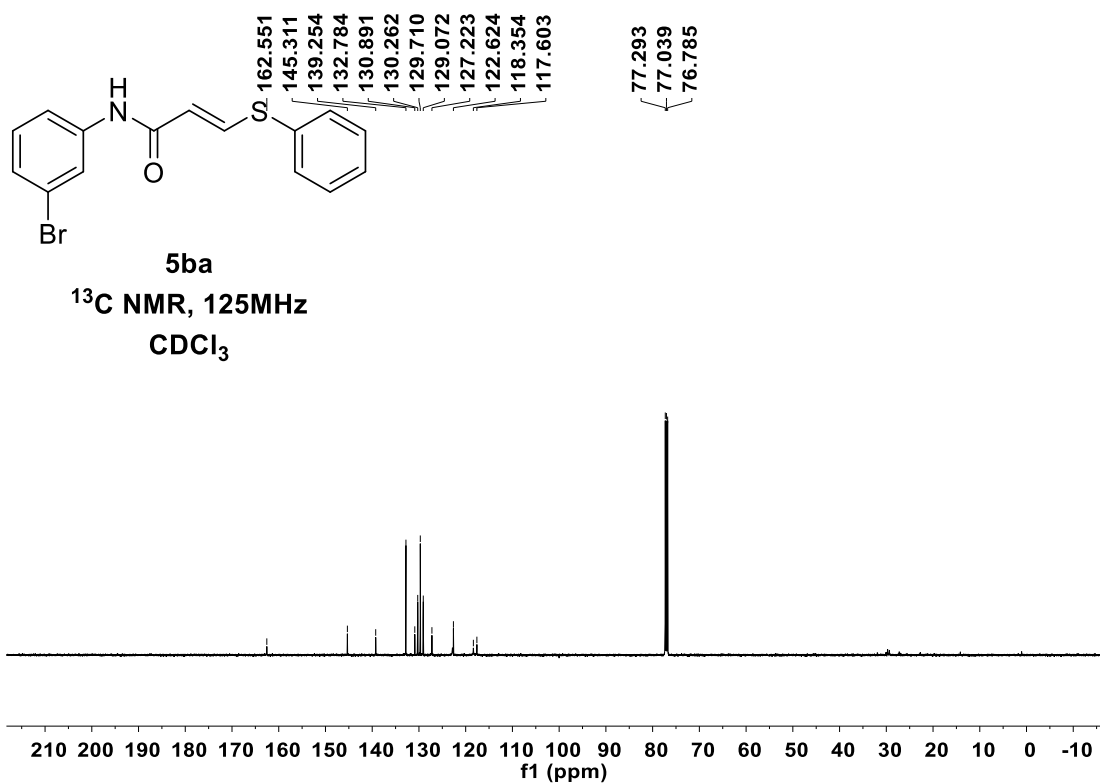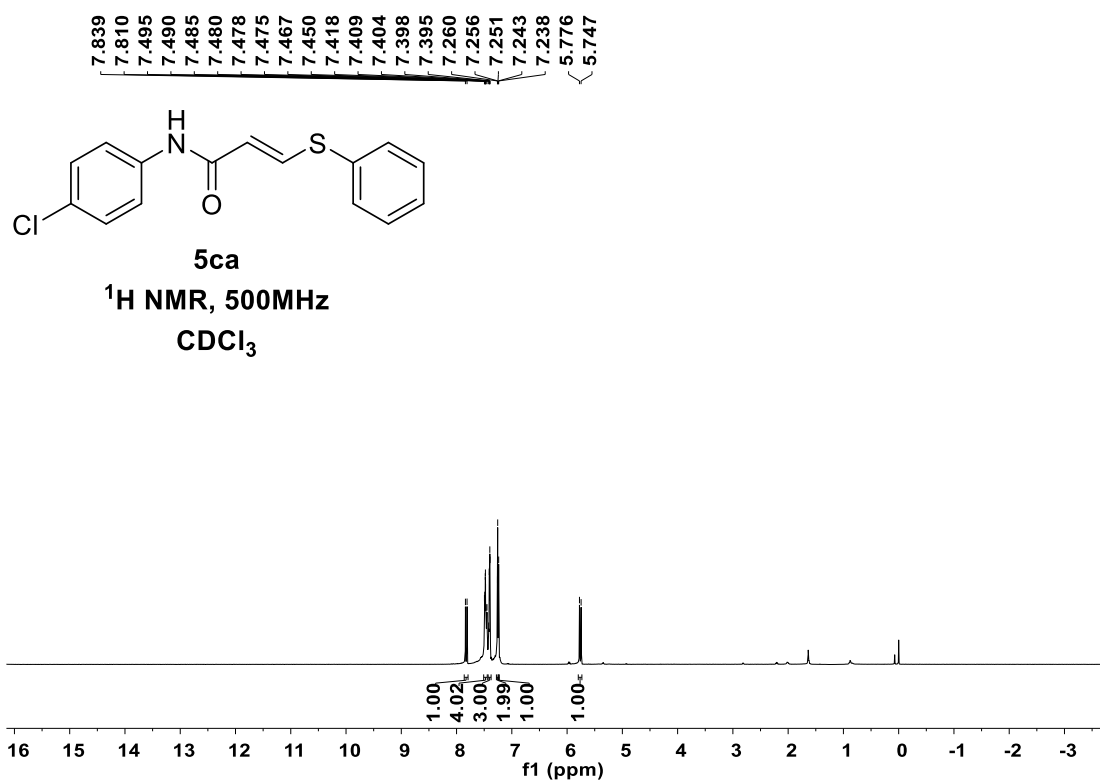

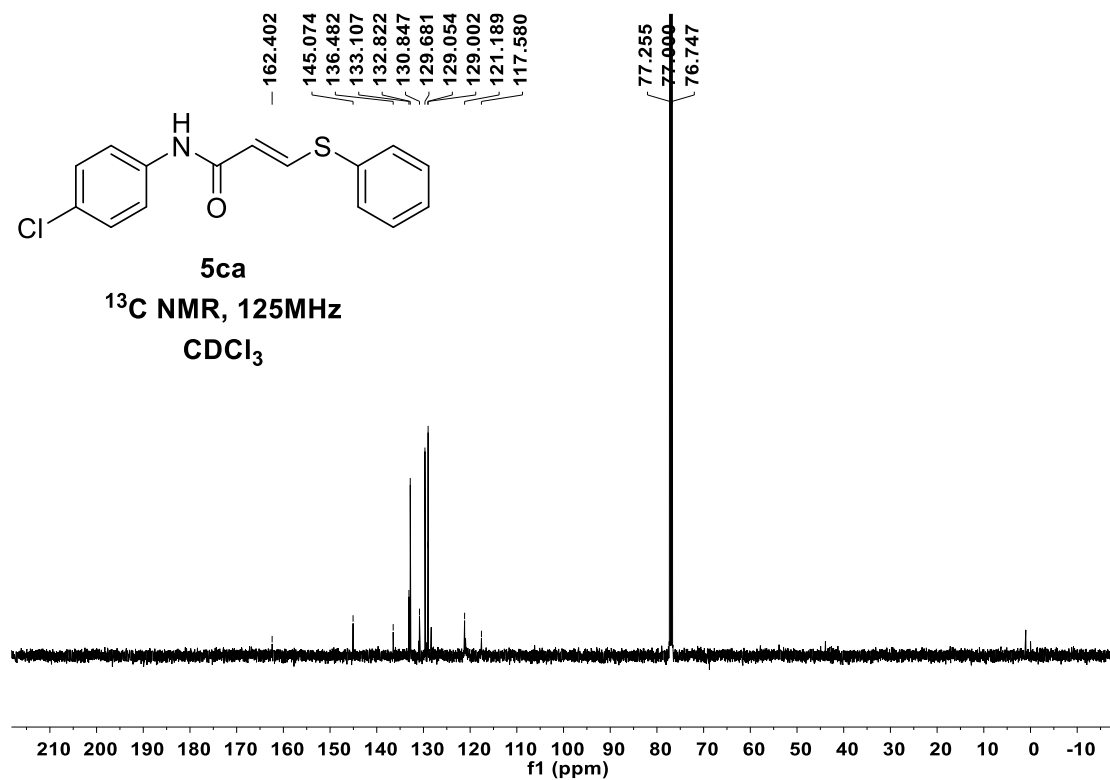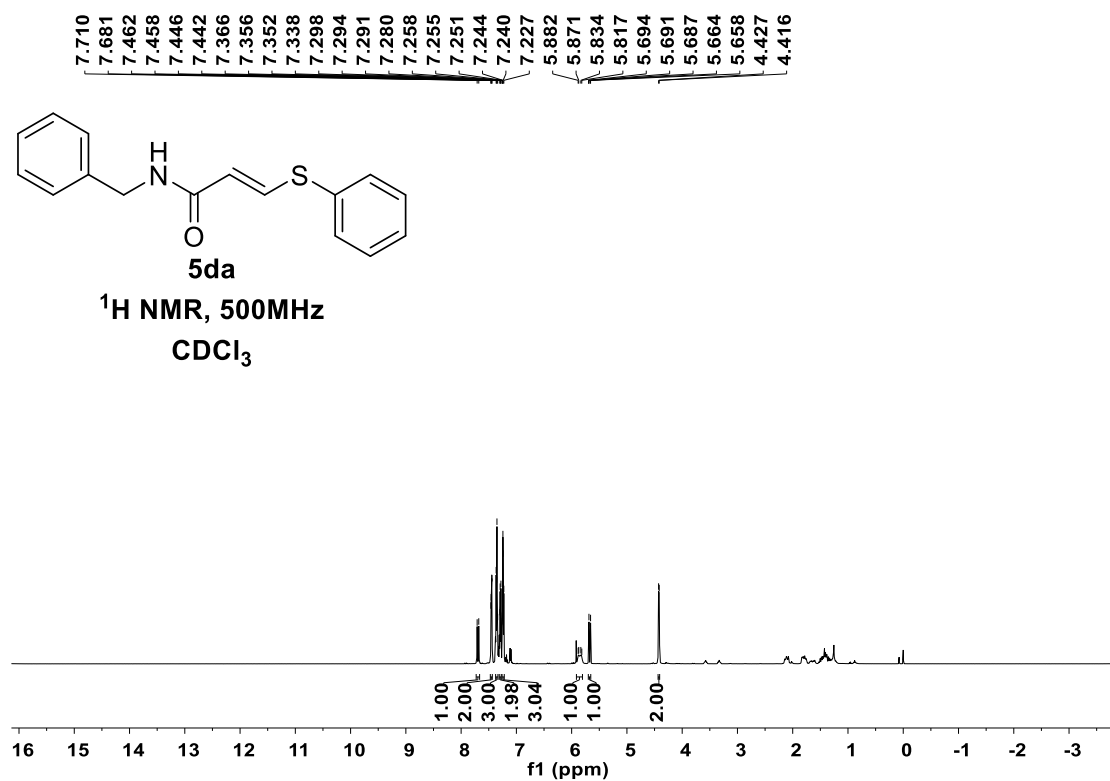

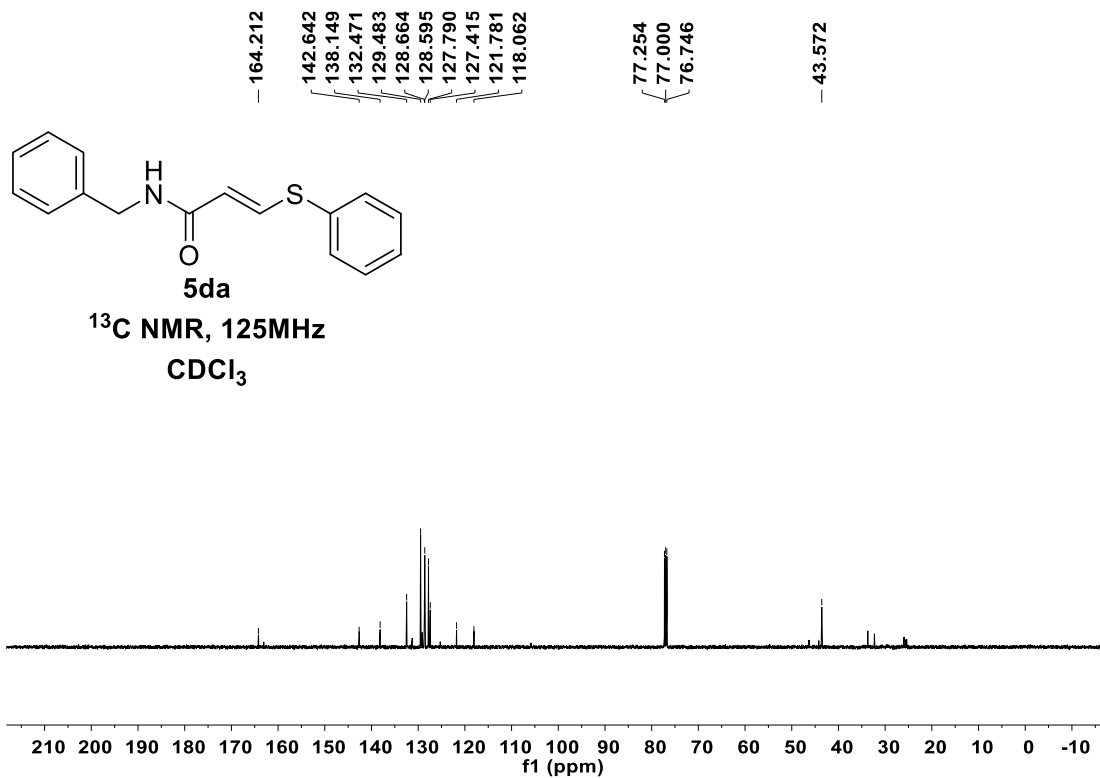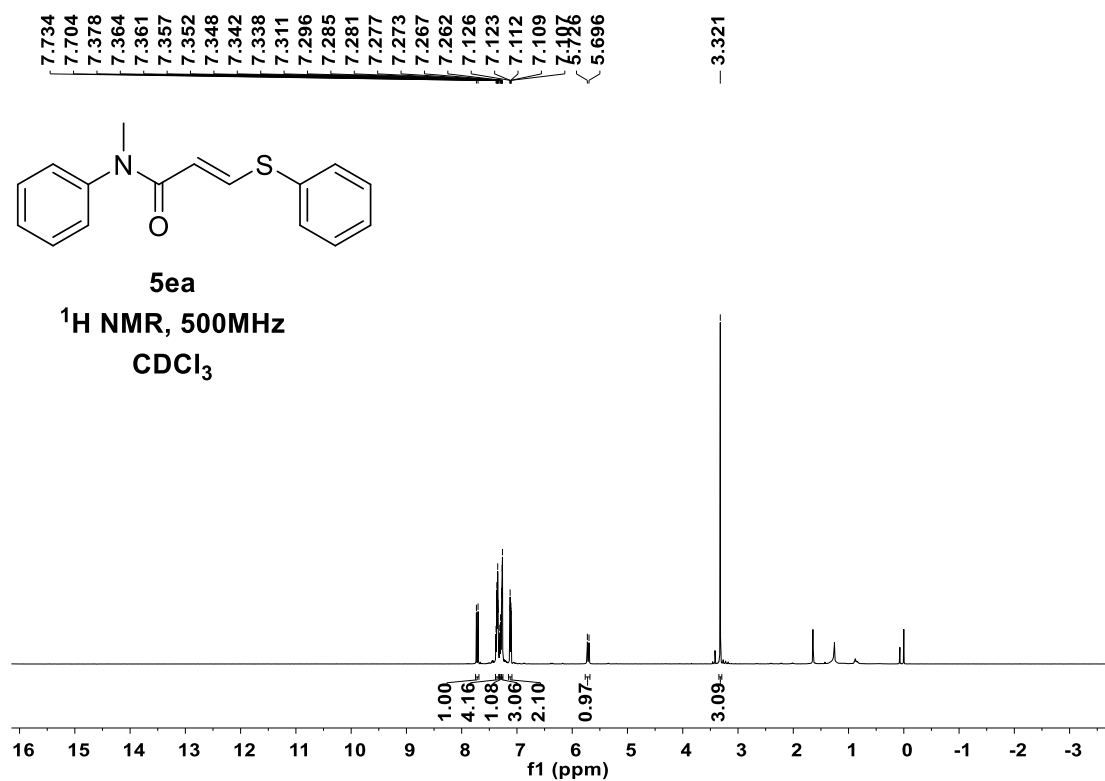

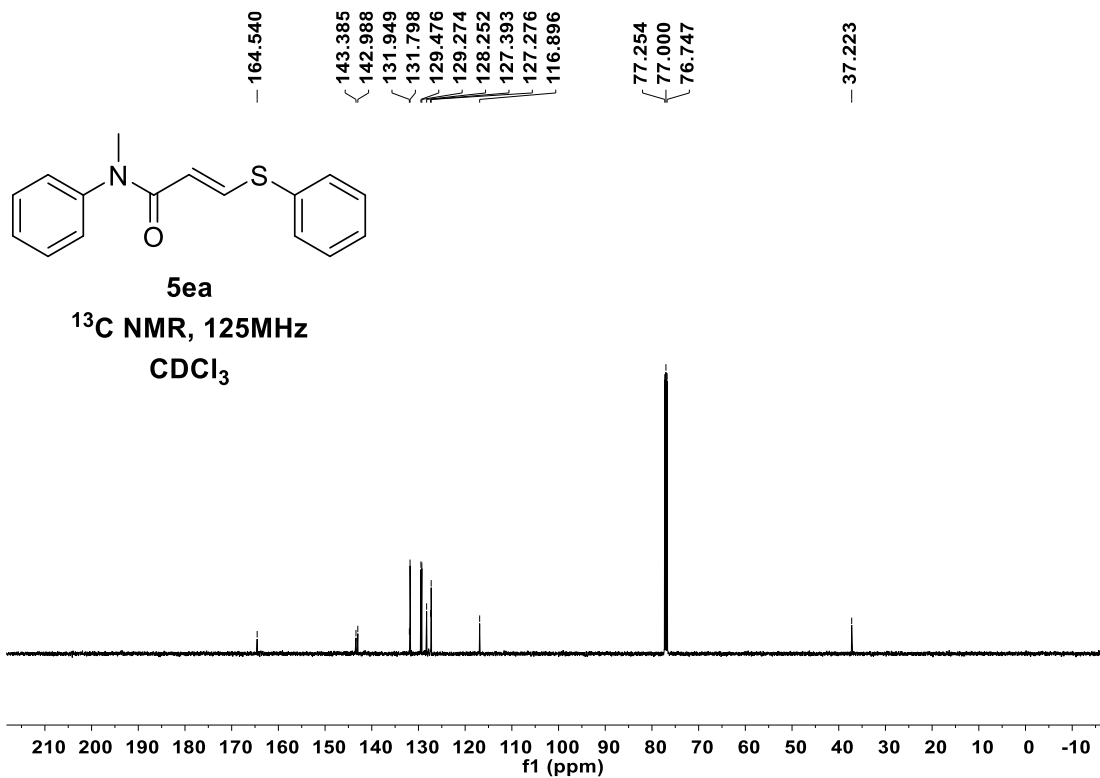

Supplement: d3cc06041a1.pdf [file d3cc06041a1.pdf]
